# Supplementary material for: Air quality improvement in a megacity: implications from 2015 Beijing Parade Blue pollution control actions
Source: Copernicus journal article supplement (doi:10.5194/acp-17-31-2017), 2017-01-02
Supplement: Supplementary file [file acp-17-31-2017-supplement.pdf]

Supplement of Atmos. Chem. Phys., 17, 31–46, 2017  
<http://www.atmos-chem-phys.net/17/31/2017/>  
doi:10.5194/acp-17-31-2017-supplement  
© Author(s) 2017. CC Attribution 3.0 License.

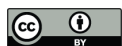

Atmospheric  
Chemistry  
and Physics  
Open Access  
EGU

*Supplement of*

## **Air quality improvement in a megacity: implications from 2015 Beijing Parade Blue pollution control actions**

**Wen Xu et al.**

*Correspondence to:* Xuejun Liu (liu310@cau.edu.cn)

The copyright of individual parts of the supplement might differ from the CC-BY 3.0 licence.

1 **Supporting Information (SI)**

2 **Figure captions**

3 **Figure S1.** Pictures showing the sites #15 (a) and #20 (b) on the 5<sup>th</sup> ring road, site #2  
4 on the 3<sup>rd</sup> ring road (c) and site #10 on the 4<sup>th</sup> ring road (d).

5 **Figure S2.** Correlations between daily average concentrations of PM<sub>2.5</sub> with those of  
6 CO (a), NO<sub>2</sub> (b), SO<sub>2</sub> (c), CO+NO<sub>2</sub>+SO<sub>2</sub> (d) and CO+NO<sub>2</sub> (e).

7 **Figure S3.** Map showing the distance between sampling site #22 and the Wanliu  
8 monitoring station in Beijing (<http://map.baidu.com/>).

9 **Figure S4.** Daily average sulfur oxidation ratio (SOR) and nitrogen oxidation ratio  
10 (NOR) during the pre-Parade Blue, Parade Blue and post-Parade Blue periods.

11 **Figure S5.** Correlations between NH<sub>4</sub><sup>+</sup> and SO<sub>4</sub><sup>2-</sup>, SO<sub>4</sub><sup>2-</sup> + NO<sub>3</sub><sup>-</sup> (unit: μeq m<sup>-3</sup>) during  
12 the pre-Parade Blue, Parade Blue and post-Parade Blue periods.

13 **Figure. S6.** 10 m mean wind field and (vector) and sea surface pressure (white)  
14 plotted on the precipitation field during the pre-Parade Blue period (left), Parade Blue  
15 period (right) and post-Parade Blue period (below).

16

17

18

19

20

21

22

23

24

25

26

27

28

29

30 **Figure S1**

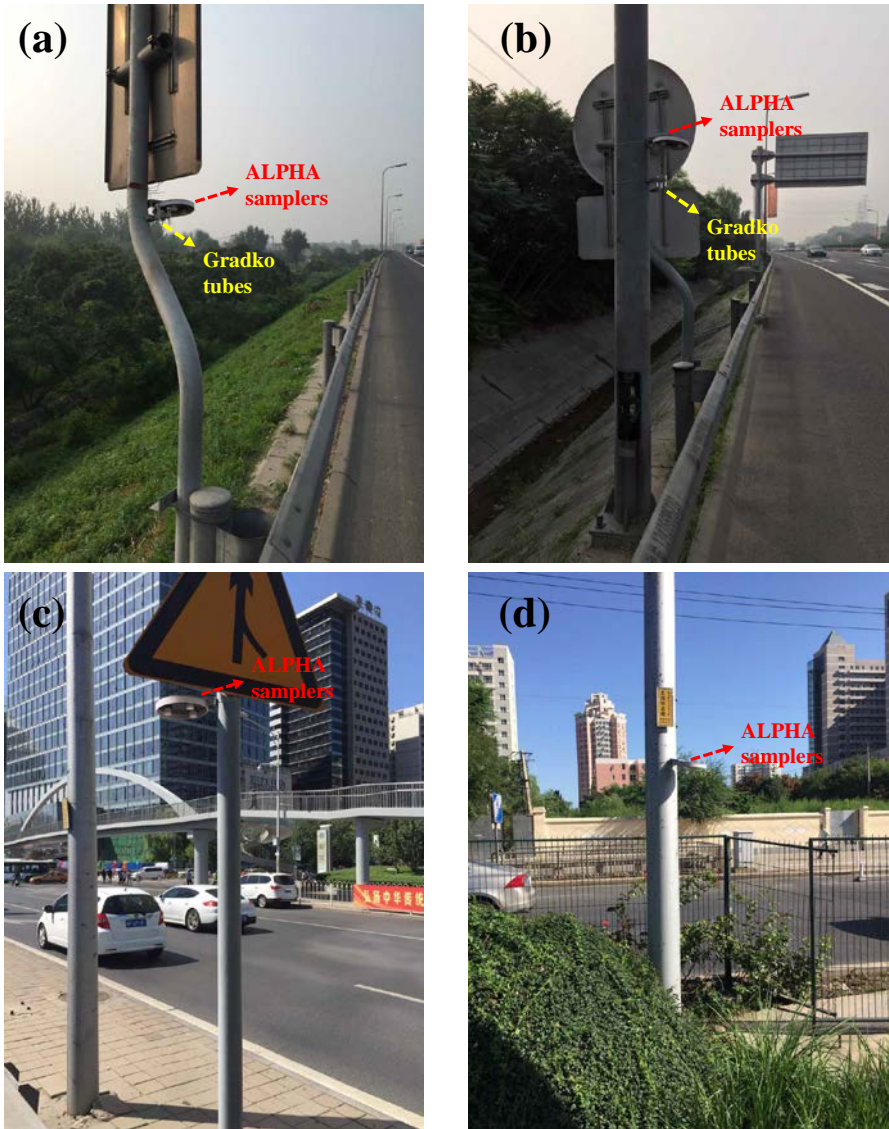

31

32

33

34

35

36

37

38

39

40

41

42

43

44 **Figure S2**

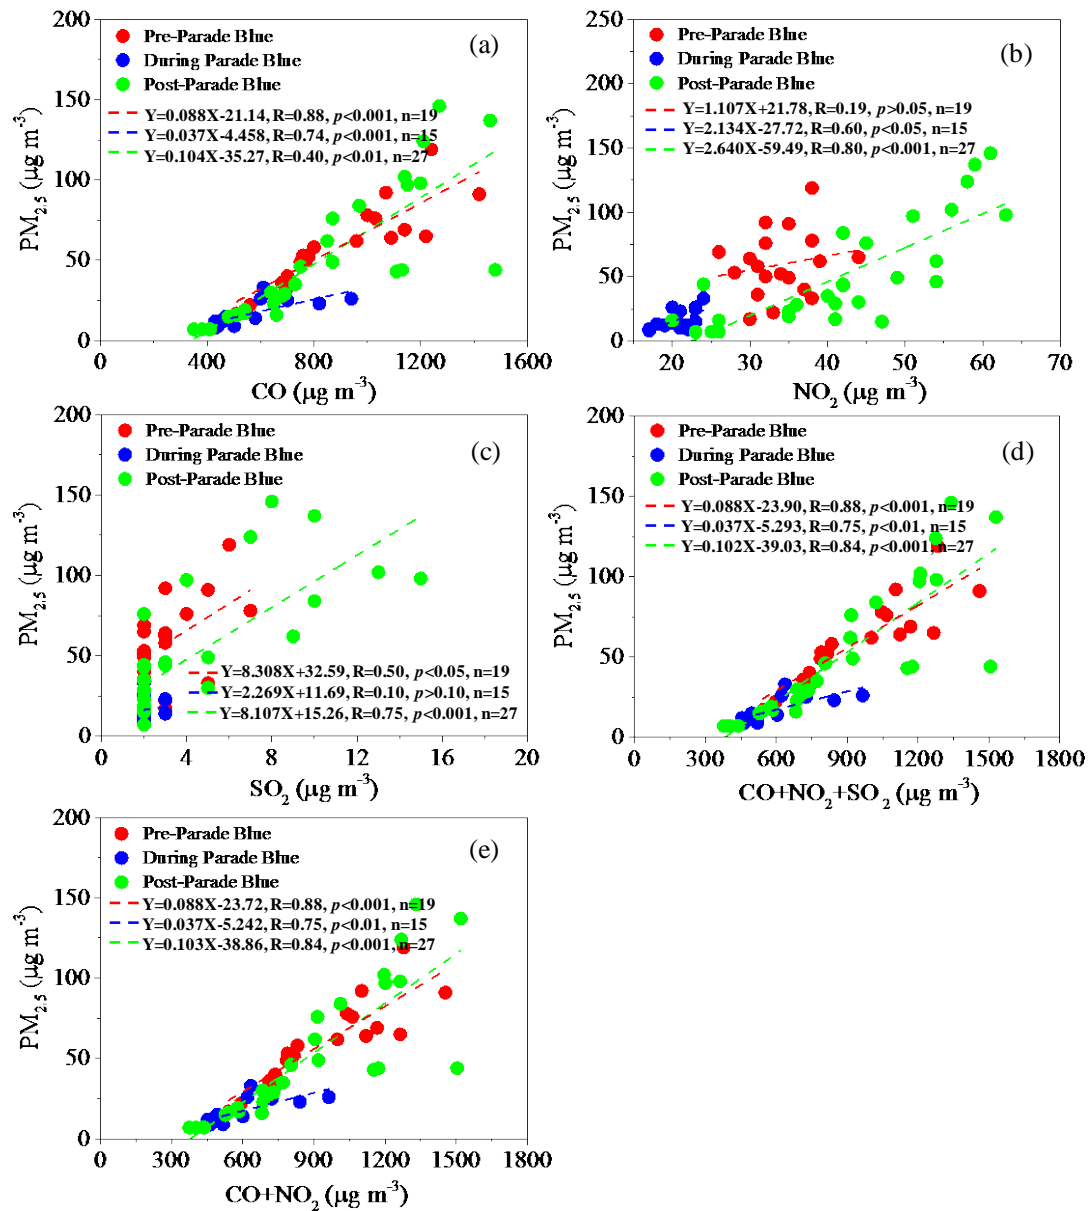

45

46

47

48

49

50

51

52

53

54

55

56 **Figure S3**

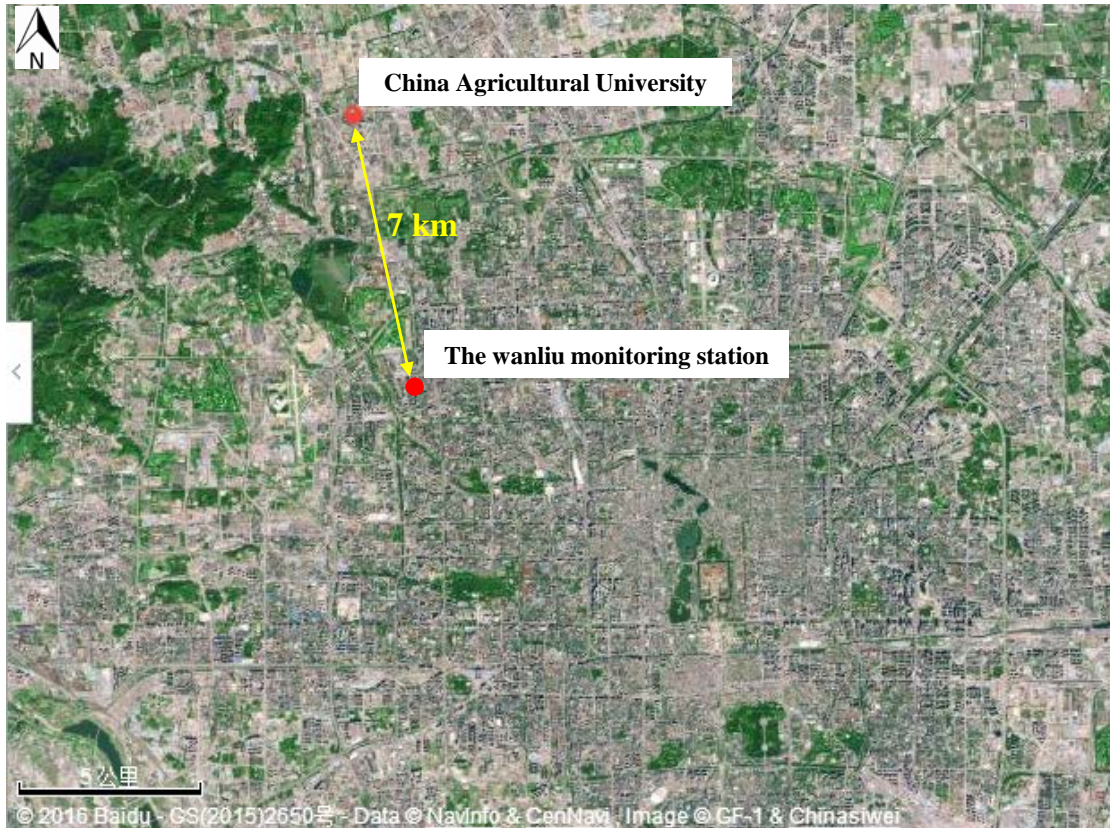

57

58

59

60

61

62

63

64

65

66

67

68

69

70

71

72

73

74

75 **Figure S4**

76

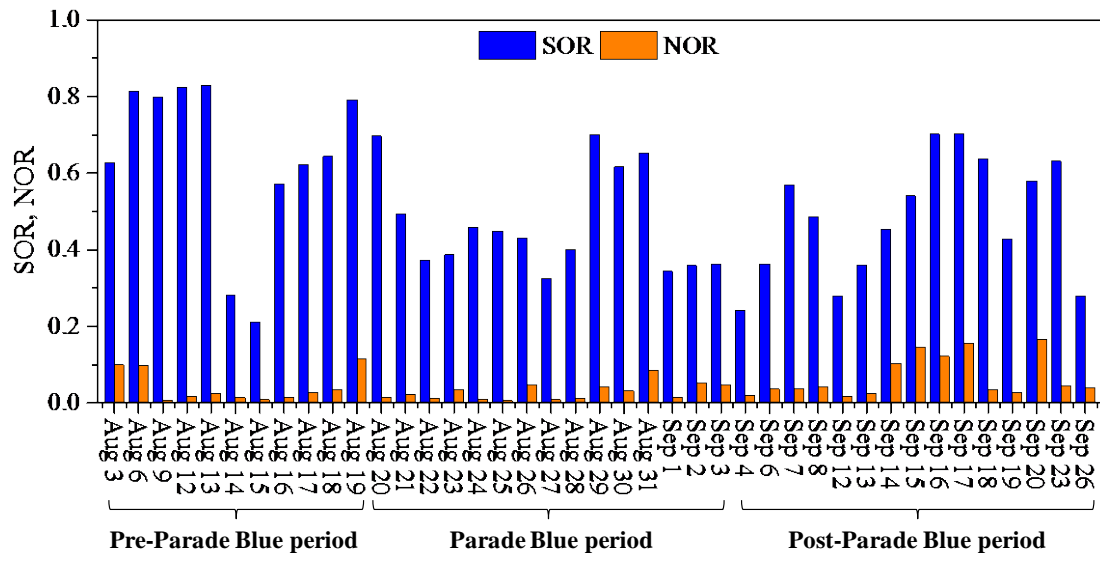

77

78

79

80

81

82

83

84

85

86

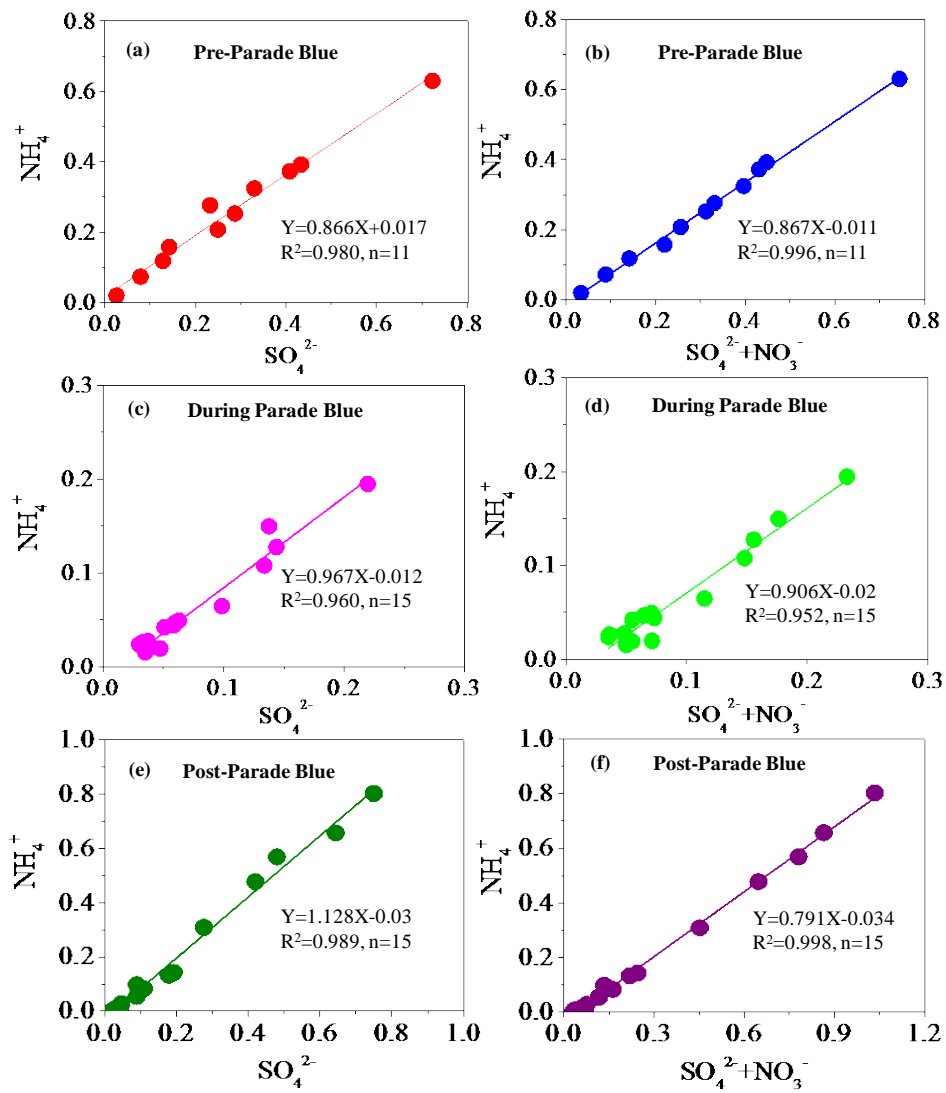



101

102 **Figure S6**

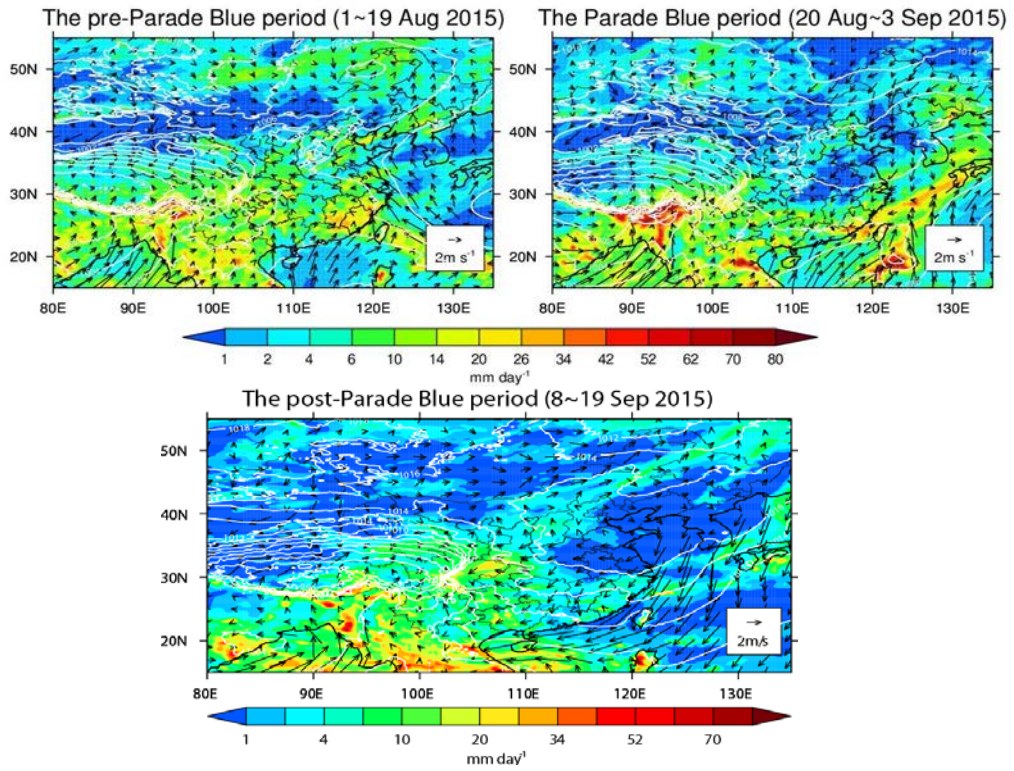

103



**Table S1.** Information on the thirty-one monitoring sites.

| Site code | Coordinate        | Sampling place                                           | Site type <sup>a</sup> | Measured pollutants | Sampling durations <sup>b</sup> for each pollutant |                 |                   | Numbers of samples <sup>c</sup> |                 |                   | Surrounding environment and possible emission sources |
|-----------|-------------------|----------------------------------------------------------|------------------------|---------------------|----------------------------------------------------|-----------------|-------------------|---------------------------------|-----------------|-------------------|-------------------------------------------------------|
|           |                   |                                                          |                        |                     | NH <sub>3</sub>                                    | NO <sub>2</sub> | PM <sub>2.5</sub> | NH <sub>3</sub>                 | NO <sub>2</sub> | PM <sub>2.5</sub> |                                                       |
| 1         | 116.37°E, 39.95°N | At Beijing Normal University                             | NRS                    | NH <sub>3</sub>     | II, III                                            | n.m.            | n.m.              | 2                               | n.d.            | n.d.              | Densely occupied residences, traffic roads            |
| 2         | 116.47°E, 39.91°N | On the 3 <sup>rd</sup> ring road                         | RS                     | NH <sub>3</sub>     | II, III                                            | n.m.            | n.m.              | 2                               | n.d.            | n.d.              | Traffic roads                                         |
| 3         | 116.39°E, 39.86°N | On the 3 <sup>rd</sup> ring road                         | RS                     | NH <sub>3</sub>     | II, III                                            | n.m.            | n.m.              | 2                               | n.d.            | n.d.              | Traffic roads                                         |
| 4         | 116.32°E, 39.92°N | On the 3 <sup>rd</sup> ring road                         | RS                     | NH <sub>3</sub>     | II, III                                            | n.m.            | n.m.              | 2                               | n.d.            | n.d.              | Traffic roads                                         |
| 5         | 116.38°E, 39.97°N | On the 3 <sup>rd</sup> ring road                         | RS                     | NH <sub>3</sub>     | II, III                                            | n.m.            | n.m.              | 2                               | n.d.            | n.d.              | Traffic roads                                         |
| 6         | 116.29°E, 39.95°N | At Beijing Academy of Agricultural and Forestry Sciences | NRS                    | NH <sub>3</sub>     | II, III                                            | n.m.            | n.m.              | 2                               | n.d.            | n.d.              | Occupied residences, traffic roads                    |
| 7         | 116.36°E, 39.99°N | On the 4 <sup>th</sup> ring road                         | RS                     | NH <sub>3</sub>     | II, III                                            | n.m.            | n.m.              | 2                               | n.d.            | n.d.              | Traffic roads                                         |
| 8         | 116.28°E, 39.91°N | On the 4 <sup>th</sup> ring road                         | RS                     | NH <sub>3</sub>     | II, III                                            | n.m.            | n.m.              | 2                               | n.d.            | n.d.              | Traffic roads                                         |
| 9         | 116.39°E, 39.84°N | On the 4 <sup>th</sup> ring road                         | RS                     | NH <sub>3</sub>     | II, III                                            | n.m.            | n.m.              | 2                               | n.d.            | n.d.              | Traffic roads                                         |
| 10        | 116.49°E, 39.92°N | On the 4 <sup>th</sup> ring road                         | RS                     | NH <sub>3</sub>     | II, III                                            | n.m.            | n.m.              | 2                               | n.d.            | n.d.              | Traffic roads                                         |
| 11        | 116.39°E, 40.01°N | Inside the Olympic Park                                  | NRS                    | NH <sub>3</sub>     | II, III                                            | n.m.            | n.m.              | 2                               | n.d.            | n.d.              | Occupied residences, traffic roads                    |
| 12        | 116.54°E, 39.92°N | Outside a sewage treatment plant                         | NRS                    | NH <sub>3</sub>     | II, III                                            | n.m.            | n.m.              | 2                               | n.d.            | n.d.              | Small villages, sewage treatment plant                |
| 13        | 116.29°E, 40.00°N | Inside Summer Palace                                     | NRS                    | NH <sub>3</sub>     | II, III                                            | n.m.            | n.m.              | 2                               | n.d.            | n.d.              | Occupied residences, traffic roads                    |

|    |                   |                                     |     |                                                       |            |            |           |   |      |      |                                                                                         |
|----|-------------------|-------------------------------------|-----|-------------------------------------------------------|------------|------------|-----------|---|------|------|-----------------------------------------------------------------------------------------|
| 14 | 116.22°E, 39.99°N | On the 5 <sup>th</sup> ring road    | RS  | NH <sub>3</sub> , NO <sub>2</sub>                     | I, II, III | I, II, III | n.m.      | 3 | 3    | n.d. | Traffic roads                                                                           |
| 15 | 116.22°E, 39.91°N | On the 5 <sup>th</sup> ring road    | RS  | NH <sub>3</sub> , NO <sub>2</sub>                     | I, II, III | I, II, III | n.m.      | 3 | 3    | n.d. | Traffic roads                                                                           |
| 16 | 116.27°E, 39.79°N | On the 5 <sup>th</sup> ring road    | RS  | NH <sub>3</sub> , NO <sub>2</sub>                     | I, II, III | I, II, III | n.m.      | 3 | 3    | n.d. | Traffic roads                                                                           |
| 17 | 116.40°E, 39.77°N | On the 5 <sup>th</sup> ring road    | RS  | NH <sub>3</sub> , NO <sub>2</sub>                     | I, II, III | I, II, III | n.m.      | 3 | 3    | n.d. | Traffic roads                                                                           |
| 18 | 116.49°E, 39.81°N | On the 5 <sup>th</sup> ring road    | RS  | NH <sub>3</sub> , NO <sub>2</sub>                     | I, II, III | I, II, III | n.m.      | 3 | 3    | n.d. | Traffic roads                                                                           |
| 19 | 116.56°E, 39.88°N | On the 5 <sup>th</sup> ring road    | RS  | NH <sub>3</sub> , NO <sub>2</sub>                     | I, II, III | I, II, III | n.m.      | 3 | 3    | n.d. | Traffic roads                                                                           |
| 20 | 116.52°E, 39.99°N | On the 5 <sup>th</sup> ring road    | RS  | NH <sub>3</sub> , NO <sub>2</sub>                     | I, II, III | I, II, III | n.m.      | 3 | 3    | n.d. | Traffic roads                                                                           |
| 21 | 116.39°E, 40.03°N | On the 5 <sup>th</sup> ring road    | RS  | NH <sub>3</sub> , NO <sub>2</sub>                     | I, II, III | I, II, III | n.m.      | 3 | 3    | n.d. | Traffic roads                                                                           |
| 22 | 116.29°E, 40.03°N | At China Agricultural University    | NRS | NH <sub>3</sub> , NO <sub>2</sub> , PM <sub>2.5</sub> | I, II, III | I, II, III | I, II, IV | 3 | 3    | 41   | Densely occupied residences, industry, small-scale urban agriculture, and traffic roads |
| 23 | 116.26°E, 40.04°N | On the Baiwang hill                 | NRS | NH <sub>3</sub> , NO <sub>2</sub>                     | I, II, III | I, II, III | n.m.      | 3 | 3    | n.d. | Small villages and roads                                                                |
| 24 | 116.23°E, 40.07°N | At a landfill site                  | NRS | NH <sub>3</sub>                                       | II, III    | n.m.       | n.m.      | 2 | n.d. | n.d. | Small villages, refuse landfill                                                         |
| 25 | 116.19°E, 40.14°N | In Shangzhuang Experimental Station | NRS | NH <sub>3</sub> , NO <sub>2</sub>                     | I, II, III | I, II, III | n.m.      | 3 | 3    | n.d. | Small villages, croplands                                                               |
| 26 | 116.14°E, 40.26°N | On an expressway                    | RS  | NH <sub>3</sub> , NO <sub>2</sub>                     | II, III    | II, III    | n.m.      | 2 | 2    | n.d. | Traffic roads                                                                           |

|    |                       |                                          |    |                                                       |            |            |           |   |   |      |                                                  |
|----|-----------------------|------------------------------------------|----|-------------------------------------------------------|------------|------------|-----------|---|---|------|--------------------------------------------------|
| 27 | 116.02°E, 40.36°N     | Inside Badaling Highway Tunnel           | RS | NH <sub>3</sub> , NO <sub>2</sub>                     | II, III    | II, III    | n.m.      | 2 | 2 | n.d. | Traffic roads                                    |
| 28 | 116.01°E, 40.36°N     | Near the exit of Badaling Highway Tunnel | RS | NH <sub>3</sub> , NO <sub>2</sub>                     | II, III    | II, III    | n.m.      | 2 | 2 | n.d. | Traffic roads                                    |
| 29 | 116.58°E, 36.84°N     | In Yucheng Experimental Station          | RS | NH <sub>3</sub> , NO <sub>2</sub> , PM <sub>2.5</sub> | I, II, III | I, II, III | I, II, IV | 3 | 3 | 21   | Small villages, croplands                        |
| 30 | 115.02°E, 36.87°N     | In Quzhou Experimental Station           | RS | NH <sub>3</sub> , NO <sub>2</sub> , PM <sub>2.5</sub> | I, II, III | I, II, III | I, II, IV | 3 | 3 | 19   | Small villages, croplands                        |
| 31 | 120.75 ° E, 37.93 ° N | On Changdao Island                       | BS | NH <sub>3</sub> , NO <sub>2</sub>                     | I, II, III | I, II, III | n.m.      | 3 | 3 | n.d. | Almost no agricultural and industrial activities |

105 <sup>a</sup> NRS, RS and BS denote non-road site, road site and background site, respectively.

106 <sup>b</sup> I, II, III, and IV denote the periods of 3-19 August 2015, 20 August-3 September 2015, 8-19 September 2015, and 4-30 September 2015,  
 107 respectively; n.m. means no measurements.

108 <sup>d</sup> Values for NH<sub>3</sub> and NO<sub>2</sub> samples multiply by 3 to obtain the total numbers of samples; n.d. means no data.

109

110

111

112

113

114

115

116 Table S2. Summary of daily average PM<sub>2.5</sub> concentrations ( $\mu\text{g m}^{-3}$ ) during the pre-Parade Blue, Parade Blue and post-Parade Blue periods in the  
 117 291 cities across China.

| City         | Province     | Region <sup>a</sup> | Pre-Parade Blue period <sup>b</sup> |    |     |     | Parade Blue period <sup>b</sup> |    |     |     | Post-Parade Blue period <sup>b</sup> |    |     |     |
|--------------|--------------|---------------------|-------------------------------------|----|-----|-----|---------------------------------|----|-----|-----|--------------------------------------|----|-----|-----|
|              |              |                     | Mean                                | SE | Min | Max | Mean                            | SE | Min | Max | Mean                                 | SE | Min | Max |
| Beijing      | Municipality | EC                  | 59                                  | 6  | 17  | 119 | 17                              | 2  | 8   | 33  | 52                                   | 8  | 7   | 146 |
| Tianjing     | Municipality | EC                  | 62                                  | 5  | 20  | 116 | 32                              | 4  | 15  | 77  | 47                                   | 5  | 9   | 116 |
| Baoding      | Hebei        | EC                  | 88                                  | 7  | 29  | 148 | 35                              | 4  | 16  | 75  | 66                                   | 8  | 15  | 159 |
| Cangzhou     | Hebei        | EC                  | 59                                  | 6  | 17  | 119 | 17                              | 2  | 8   | 33  | 39                                   | 5  | 9   | 88  |
| Chengde      | Hebei        | EC                  | 31                                  | 4  | 11  | 73  | 14                              | 0  | 11  | 17  | 28                                   | 4  | 9   | 95  |
| Handan       | Hebei        | EC                  | 81                                  | 7  | 35  | 147 | 52                              | 7  | 9   | 91  | 63                                   | 6  | 15  | 131 |
| Hengshui     | Hebei        | EC                  | 91                                  | 7  | 33  | 159 | 47                              | 5  | 25  | 92  | 76                                   | 8  | 24  | 167 |
| Langfang     | Hebei        | EC                  | 69                                  | 6  | 17  | 113 | 24                              | 4  | 5   | 78  | 54                                   | 7  | 4   | 132 |
| Qinhuangdao  | Hebei        | EC                  | 45                                  | 6  | 10  | 92  | 7                               | 1  | 4   | 23  | 15                                   | 2  | 4   | 46  |
| Shijiazhuang | Hebei        | EC                  | 78                                  | 7  | 20  | 128 | 35                              | 5  | 6   | 77  | 45                                   | 5  | 11  | 98  |
| Tangshan     | Hebei        | EC                  | 73                                  | 6  | 25  | 118 | 13                              | 2  | 4   | 29  | 43                                   | 5  | 8   | 91  |
| Xingtai      | Hebei        | EC                  | 83                                  | 7  | 30  | 144 | 45                              | 7  | 8   | 101 | 60                                   | 5  | 17  | 103 |
| Zhangjiakou  | Hebei        | EC                  | 29                                  | 3  | 17  | 66  | 18                              | 1  | 9   | 27  | 27                                   | 4  | 11  | 71  |
| Changzhi     | Shanxi       | EC                  | 59                                  | 5  | 22  | 96  | 39                              | 3  | 25  | 55  | 47                                   | 3  | 15  | 79  |
| Datong       | Shanxi       | EC                  | 26                                  | 2  | 13  | 59  | 16                              | 1  | 12  | 22  | 27                                   | 3  | 9   | 71  |
| Jincheng     | Shanxi       | EC                  | 41                                  | 3  | 11  | 69  | 37                              | 3  | 19  | 70  | 37                                   | 4  | 8   | 104 |
| Jinzhong     | Shanxi       | EC                  | 39                                  | 3  | 21  | 71  | 26                              | 3  | 11  | 51  | 43                                   | 4  | 8   | 88  |
| Linfen       | Shanxi       | EC                  | 32                                  | 2  | 19  | 44  | 27                              | 2  | 17  | 43  | 40                                   | 3  | 11  | 63  |
| Lvliang      | Shanxi       | EC                  | 46                                  | 4  | 17  | 88  | 29                              | 2  | 18  | 40  | 46                                   | 4  | 18  | 85  |
| Shuozhou     | Shanxi       | EC                  | 39                                  | 2  | 18  | 54  | 28                              | 1  | 22  | 36  | 39                                   | 4  | 17  | 89  |
| Taiyuan      | Shanxi       | EC                  | 44                                  | 3  | 26  | 73  | 23                              | 3  | 9   | 55  | 46                                   | 5  | 10  | 106 |

|             |                |    |    |   |    |     |    |   |    |     |    |   |    |     |
|-------------|----------------|----|----|---|----|-----|----|---|----|-----|----|---|----|-----|
| Xinzhou     | Shanxi         | EC | 39 | 3 | 23 | 61  | 20 | 2 | 12 | 36  | 44 | 5 | 12 | 107 |
| Yangquan    | Shanxi         | EC | 38 | 3 | 16 | 64  | 19 | 2 | 9  | 31  | 36 | 4 | 6  | 70  |
| Yuncheng    | Shanxi         | EC | 58 | 3 | 29 | 78  | 48 | 3 | 29 | 69  | 38 | 2 | 16 | 68  |
| Binzhou     | Shandong       | EC | 49 | 5 | 12 | 94  | 37 | 4 | 18 | 69  | 51 | 6 | 12 | 139 |
| Dezhou      | Shandong       | EC | 89 | 6 | 25 | 133 | 44 | 4 | 23 | 85  | 72 | 8 | 22 | 159 |
| Dongying    | Shandong       | EC | 65 | 7 | 21 | 123 | 43 | 4 | 21 | 80  | 51 | 6 | 13 | 117 |
| Jinan       | Shandong       | EC | 59 | 5 | 21 | 87  | 50 | 4 | 30 | 82  | 72 | 5 | 23 | 118 |
| Jining      | Shandong       | EC | 50 | 5 | 22 | 103 | 49 | 3 | 34 | 78  | 58 | 4 | 21 | 101 |
| Laiwu       | Shandong       | EC | 54 | 6 | 19 | 98  | 65 | 5 | 40 | 101 | 62 | 5 | 19 | 122 |
| Liaocheng   | Shandong       | EC | 67 | 6 | 24 | 105 | 49 | 5 | 17 | 80  | 73 | 6 | 27 | 122 |
| Linyi       | Shandong       | EC | 37 | 4 | 15 | 76  | 43 | 4 | 25 | 78  | 45 | 6 | 13 | 133 |
| Qingdao     | Shandong       | EC | 35 | 4 | 9  | 60  | 30 | 3 | 14 | 71  | 25 | 3 | 9  | 71  |
| Rizhao      | Shandong       | EC | 39 | 4 | 8  | 75  | 40 | 5 | 16 | 74  | 37 | 5 | 7  | 93  |
| Tai'an      | Shandong       | EC | 42 | 4 | 21 | 76  | 40 | 3 | 20 | 67  | 51 | 4 | 20 | 92  |
| Weihai      | Shandong       | EC | 38 | 4 | 19 | 74  | 22 | 2 | 7  | 31  | 20 | 2 | 7  | 47  |
| Weifang     | Shandong       | EC | 51 | 6 | 17 | 102 | 55 | 7 | 25 | 115 | 50 | 7 | 17 | 170 |
| Yantai      | Shandong       | EC | 39 | 5 | 14 | 87  | 23 | 2 | 9  | 36  | 23 | 2 | 9  | 63  |
| Zaozhuang   | Shandong       | EC | 45 | 5 | 16 | 83  | 51 | 3 | 40 | 74  | 60 | 6 | 9  | 144 |
| Zibo        | Shandong       | EC | 56 | 4 | 29 | 90  | 55 | 4 | 35 | 89  | 68 | 6 | 26 | 135 |
| Alxa League | Inner Mongolia | EC | 38 | 3 | 18 | 66  | 33 | 1 | 22 | 40  | 36 | 2 | 21 | 60  |
| Bayannur    | Inner Mongolia | EC | 33 | 3 | 15 | 56  | 32 | 1 | 21 | 41  | 39 | 3 | 22 | 71  |
| Baotou      | Inner Mongolia | EC | 35 | 3 | 11 | 56  | 22 | 1 | 13 | 30  | 33 | 3 | 8  | 74  |
| Chifeng     | Inner Mongolia | EC | 22 | 2 | 10 | 47  | 13 | 1 | 11 | 18  | 25 | 3 | 7  | 69  |
| Ordos       | Inner Mongolia | EC | 22 | 3 | 5  | 40  | 12 | 1 | 8  | 18  | 22 | 3 | 6  | 61  |
| Hohhot      | Inner Mongolia | EC | 23 | 2 | 8  | 43  | 14 | 1 | 10 | 23  | 27 | 3 | 5  | 64  |
| Hulun Buir  | Inner Mongolia | EC | 28 | 2 | 18 | 48  | 26 | 2 | 16 | 38  | 22 | 1 | 15 | 36  |

|                |                |     |    |   |    |     |    |   |    |    |    |   |    |     |
|----------------|----------------|-----|----|---|----|-----|----|---|----|----|----|---|----|-----|
| Tongliao       | Inner Mongolia | EC  | 46 | 6 | 17 | 99  | 25 | 3 | 17 | 55 | 27 | 3 | 13 | 74  |
| Wuhai          | Inner Mongolia | EC  | 42 | 4 | 18 | 85  | 30 | 2 | 18 | 44 | 51 | 5 | 18 | 109 |
| Hinggan League | Inner Mongolia | EC  | 27 | 2 | 15 | 37  | 21 | 1 | 15 | 28 | 18 | 1 | 8  | 33  |
| Anyang         | Henan          | EC  | 61 | 5 | 30 | 106 | 46 | 5 | 16 | 82 | 68 | 6 | 29 | 158 |
| Hebi           | Henan          | EC  | 50 | 4 | 26 | 76  | 31 | 4 | 10 | 61 | 44 | 4 | 20 | 92  |
| Jiaozuo        | Henan          | EC  | 40 | 3 | 13 | 61  | 41 | 4 | 12 | 63 | 37 | 3 | 15 | 70  |
| Kaifeng        | Henan          | EC  | 45 | 4 | 21 | 81  | 38 | 4 | 17 | 69 | 54 | 5 | 20 | 124 |
| Luoyang        | Henan          | EC  | 56 | 6 | 20 | 95  | 41 | 3 | 21 | 56 | 41 | 4 | 12 | 80  |
| Luohe          | Henan          | EC  | 48 | 5 | 21 | 87  | 52 | 3 | 31 | 71 | 81 | 7 | 32 | 194 |
| Nanyang        | Henan          | EC  | 49 | 4 | 22 | 84  | 56 | 4 | 31 | 85 | 55 | 4 | 33 | 97  |
| Pingdingshan   | Henan          | EC  | 53 | 6 | 19 | 91  | 50 | 3 | 33 | 73 | 68 | 5 | 29 | 142 |
| Sanmenxia      | Henan          | EC  | 58 | 5 | 17 | 94  | 39 | 3 | 20 | 56 | 36 | 3 | 8  | 66  |
| Shangqiu       | Henan          | EC  | 41 | 4 | 19 | 88  | 40 | 4 | 18 | 79 | 47 | 4 | 18 | 102 |
| Xinyang        | Henan          | EC  | 29 | 4 | 13 | 67  | 40 | 3 | 22 | 61 | 47 | 4 | 15 | 94  |
| Zhengzhou      | Henan          | EC  | 61 | 6 | 25 | 112 | 50 | 6 | 17 | 98 | 70 | 6 | 31 | 162 |
| Zhoukou        | Henan          | EC  | 36 | 3 | 22 | 60  | 42 | 3 | 21 | 58 | 68 | 6 | 26 | 146 |
| Zhumadian      | Henan          | EC  | 41 | 4 | 16 | 76  | 41 | 3 | 16 | 59 | 60 | 6 | 20 | 130 |
| Anshan         | Liaoning       | NEC | 42 | 5 | 14 | 72  | 43 | 2 | 30 | 59 | 41 | 4 | 17 | 95  |
| Benxi          | Liaoning       | NEC | 34 | 3 | 17 | 72  | 30 | 2 | 12 | 45 | 31 | 3 | 11 | 61  |
| Chaoyang       | Liaoning       | NEC | 30 | 4 | 13 | 65  | 14 | 1 | 9  | 25 | 30 | 5 | 9  | 105 |
| Dalian         | Liaoning       | NEC | 41 | 5 | 13 | 97  | 23 | 3 | 11 | 52 | 24 | 2 | 8  | 59  |
| Dandong        | Liaoning       | NEC | 24 | 4 | 1  | 51  | 20 | 2 | 8  | 28 | 26 | 2 | 8  | 53  |
| Fushun         | Liaoning       | NEC | 27 | 3 | 12 | 63  | 18 | 2 | 6  | 28 | 28 | 3 | 6  | 54  |
| Fuxin          | Liaoning       | NEC | 44 | 6 | 11 | 97  | 18 | 2 | 9  | 34 | 32 | 3 | 10 | 83  |
| Huludao        | Liaoning       | NEC | 66 | 9 | 20 | 137 | 24 | 2 | 15 | 48 | 34 | 4 | 9  | 92  |
| Jinzhou        | Liaoning       | NEC | 58 | 8 | 23 | 125 | 19 | 2 | 10 | 44 | 34 | 4 | 10 | 85  |



|              |              |     |    |   |    |     |    |   |    |    |    |   |    |    |
|--------------|--------------|-----|----|---|----|-----|----|---|----|----|----|---|----|----|
| Liaoyang     | Liaoning     | NEC | 36 | 4 | 11 | 69  | 31 | 2 | 18 | 41 | 34 | 3 | 11 | 80 |
| Panjin       | Liaoning     | NEC | 41 | 6 | 13 | 93  | 18 | 2 | 10 | 43 | 26 | 3 | 7  | 59 |
| Shenyang     | Liaoning     | NEC | 36 | 4 | 16 | 66  | 23 | 2 | 11 | 35 | 36 | 4 | 10 | 77 |
| Tieling      | Liaoning     | NEC | 28 | 3 | 13 | 53  | 17 | 2 | 7  | 31 | 28 | 3 | 11 | 71 |
| Wafangdian   | Liaoning     | NEC | 48 | 6 | 19 | 103 | 27 | 1 | 21 | 38 | 38 | 3 | 13 | 84 |
| Yingkou      | Liaoning     | NEC | 25 | 3 | 11 | 45  | 23 | 3 | 9  | 51 | 22 | 3 | 5  | 66 |
| Baicheng     | Jilin        | NEC | 47 | 2 | 36 | 63  | 42 | 1 | 32 | 51 | 36 | 2 | 22 | 61 |
| Baishan      | Jilin        | NEC | 29 | 3 | 15 | 52  | 25 | 2 | 17 | 38 | 30 | 2 | 17 | 43 |
| Changchun    | Jilin        | NEC | 29 | 4 | 16 | 73  | 23 | 2 | 8  | 39 | 27 | 2 | 12 | 63 |
| Jilin        | Jilin        | NEC | 19 | 2 | 10 | 39  | 18 | 2 | 8  | 30 | 24 | 2 | 13 | 54 |
| Liaoyuan     | Jilin        | NEC | 36 | 5 | 13 | 76  | 36 | 6 | 14 | 81 | 36 | 3 | 17 | 79 |
| Siping       | Jilin        | NEC | 35 | 5 | 15 | 89  | 23 | 2 | 12 | 38 | 33 | 3 | 15 | 80 |
| Songyuan     | Jilin        | NEC | 20 | 1 | 10 | 36  | 13 | 1 | 5  | 23 | 19 | 2 | 8  | 41 |
| Daqing       | Heilongjiang | NEC | 30 | 2 | 17 | 51  | 21 | 1 | 15 | 33 | 22 | 2 | 13 | 42 |
| Daxinganling | Heilongjiang | NEC | 13 | 2 | 5  | 40  | 10 | 1 | 7  | 14 | 13 | 1 | 4  | 29 |
| Harbin       | Heilongjiang | NEC | 25 | 2 | 15 | 38  | 18 | 2 | 11 | 35 | 21 | 2 | 10 | 42 |
| Hegang       | Heilongjiang | NEC | 47 | 2 | 33 | 70  | 28 | 4 | 6  | 61 | 11 | 1 | 5  | 27 |
| Heihe        | Heilongjiang | NEC | 33 | 1 | 26 | 44  | 27 | 1 | 18 | 34 | 10 | 1 | 4  | 33 |
| Jixi         | Heilongjiang | NEC | 19 | 1 | 14 | 25  | 16 | 1 | 11 | 27 | 19 | 1 | 9  | 32 |
| Jiamusi      | Heilongjiang | NEC | 15 | 1 | 6  | 24  | 13 | 1 | 7  | 29 | 11 | 1 | 5  | 17 |
| Mudanjiang   | Heilongjiang | NEC | 20 | 1 | 16 | 27  | 22 | 1 | 14 | 33 | 23 | 1 | 16 | 38 |
| Qitaihe      | Heilongjiang | NEC | 22 | 1 | 17 | 32  | 21 | 1 | 14 | 33 | 25 | 1 | 13 | 39 |
| Qiqihar      | Heilongjiang | NEC | 19 | 2 | 7  | 31  | 13 | 1 | 6  | 22 | 16 | 1 | 6  | 31 |
| Shuangyashan | Heilongjiang | NEC | 23 | 1 | 17 | 28  | 26 | 1 | 19 | 34 | 20 | 1 | 10 | 31 |
| Suihua       | Heilongjiang | NEC | 15 | 1 | 9  | 26  | 11 | 1 | 8  | 15 | 16 | 1 | 10 | 29 |
| Ankang       | Shaanxi      | NEC | 21 | 2 | 7  | 43  | 27 | 2 | 13 | 44 | 37 | 3 | 13 | 63 |

|            |         |     |    |   |    |     |    |   |    |    |    |   |    |     |
|------------|---------|-----|----|---|----|-----|----|---|----|----|----|---|----|-----|
| Baoji      | Shaanxi | NEC | 38 | 5 | 11 | 78  | 34 | 4 | 11 | 68 | 35 | 4 | 8  | 71  |
| Hanzhong   | Shaanxi | NEC | 27 | 3 | 10 | 60  | 32 | 2 | 18 | 40 | 32 | 2 | 9  | 58  |
| Shangluo   | Shaanxi | NEC | 28 | 3 | 9  | 65  | 27 | 2 | 14 | 42 | 35 | 3 | 12 | 65  |
| Tongchuan  | Shaanxi | NEC | 36 | 4 | 12 | 71  | 32 | 2 | 14 | 45 | 37 | 3 | 11 | 60  |
| Weinan     | Shaanxi | NEC | 36 | 3 | 8  | 58  | 34 | 3 | 17 | 52 | 55 | 5 | 10 | 119 |
| Xi'an      | Shaanxi | NEC | 45 | 4 | 13 | 73  | 40 | 3 | 20 | 66 | 38 | 3 | 11 | 77  |
| Xianyang   | Shaanxi | NEC | 38 | 4 | 10 | 60  | 35 | 3 | 19 | 55 | 43 | 4 | 14 | 94  |
| Yan'an     | Shaanxi | NEC | 33 | 3 | 14 | 59  | 24 | 2 | 14 | 44 | 36 | 4 | 12 | 70  |
| Yulin      | Shaanxi | NEC | 30 | 3 | 12 | 53  | 20 | 2 | 9  | 33 | 31 | 3 | 5  | 75  |
| Baiying    | Gansu   | NEC | 26 | 3 | 9  | 65  | 27 | 1 | 21 | 33 | 26 | 2 | 9  | 47  |
| Dingxi     | Gansu   | NEC | 21 | 1 | 9  | 29  | 28 | 1 | 19 | 36 | 22 | 1 | 14 | 32  |
| Gannan     | Gansu   | NEC | 17 | 1 | 9  | 33  | 26 | 3 | 15 | 53 | 21 | 2 | 9  | 42  |
| Jiayuguan  | Gansu   | NEC | 23 | 5 | 10 | 86  | 26 | 3 | 12 | 58 | 17 | 2 | 7  | 48  |
| Jiuquan    | Gansu   | NEC | 36 | 6 | 19 | 121 | 35 | 3 | 18 | 61 | 26 | 1 | 17 | 51  |
| Lanzhou    | Gansu   | NEC | 36 | 2 | 19 | 62  | 32 | 1 | 24 | 38 | 35 | 2 | 18 | 57  |
| Linxia     | Gansu   | NEC | 18 | 1 | 7  | 28  | 21 | 2 | 12 | 35 | 23 | 1 | 13 | 31  |
| Pingliang  | Gansu   | NEC | 30 | 3 | 10 | 68  | 20 | 2 | 12 | 29 | 23 | 2 | 10 | 55  |
| Qingyang   | Gansu   | NEC | 22 | 3 | 7  | 57  | 20 | 2 | 11 | 31 | 20 | 2 | 5  | 39  |
| Tianshui   | Gansu   | NEC | 18 | 3 | 6  | 67  | 14 | 2 | 6  | 30 | 11 | 1 | 4  | 22  |
| Wuwei      | Gansu   | NEC | 27 | 4 | 14 | 77  | 27 | 2 | 11 | 44 | 19 | 1 | 8  | 32  |
| Zhangye    | Gansu   | NEC | 21 | 2 | 9  | 54  | 17 | 2 | 5  | 30 | 17 | 1 | 10 | 44  |
| Guyuan     | Ningxia | NEC | 25 | 3 | 9  | 53  | 22 | 1 | 14 | 32 | 20 | 2 | 9  | 39  |
| Shizuishan | Ningxia | NEC | 30 | 3 | 13 | 51  | 23 | 1 | 12 | 31 | 32 | 3 | 7  | 71  |
| Wuzhong    | Ningxia | NEC | 26 | 3 | 13 | 46  | 28 | 2 | 17 | 35 | 28 | 2 | 4  | 55  |
| Yinchuan   | Ningxia | NEC | 41 | 3 | 21 | 68  | 34 | 3 | 18 | 50 | 32 | 2 | 11 | 54  |
| Zhongwei   | Ningxia | NEC | 27 | 3 | 13 | 74  | 26 | 2 | 17 | 36 | 29 | 3 | 8  | 60  |

|           |          |     |     |    |    |     |    |    |    |     |    |   |    |     |
|-----------|----------|-----|-----|----|----|-----|----|----|----|-----|----|---|----|-----|
| Aksu      | Sinkiang | NEC | 99  | 16 | 22 | 281 | 52 | 6  | 28 | 95  | 43 | 6 | 18 | 169 |
| Hami      | Sinkiang | NEC | 29  | 9  | 11 | 191 | 22 | 2  | 11 | 40  | 18 | 1 | 9  | 36  |
| Hotan     | Sinkiang | NEC | 130 | 29 | 26 | 646 | 82 | 12 | 21 | 180 | 61 | 8 | 19 | 215 |
| Kashgar   | Sinkiang | NEC | 103 | 20 | 25 | 329 | 45 | 10 | 10 | 141 | 59 | 8 | 12 | 156 |
| Karamay   | Sinkiang | NEC | 20  | 1  | 15 | 35  | 16 | 1  | 12 | 20  | 16 | 1 | 10 | 26  |
| Kizilsu   | Sinkiang | NEC | 59  | 13 | 7  | 209 | 20 | 5  | 0  | 65  | 27 | 5 | 6  | 97  |
| Shihezi   | Sinkiang | NEC | 32  | 6  | 9  | 106 | 21 | 2  | 11 | 35  | 28 | 6 | 8  | 155 |
| Urumchi   | Sinkiang | NEC | 32  | 3  | 10 | 58  | 30 | 3  | 15 | 56  | 27 | 3 | 9  | 75  |
| Wujiaqu   | Sinkiang | NEC | 32  | 3  | 12 | 57  | 30 | 3  | 13 | 52  | 32 | 4 | 5  | 90  |
| Yili      | Sinkiang | NEC | 26  | 2  | 11 | 35  | 26 | 2  | 10 | 37  | 29 | 3 | 10 | 58  |
| Ezhou     | Hubei    | NEC | 33  | 4  | 8  | 67  | 51 | 3  | 22 | 71  | 49 | 2 | 18 | 72  |
| Huanggang | Hubei    | NEC | 33  | 3  | 9  | 64  | 46 | 3  | 21 | 60  | 42 | 2 | 14 | 61  |
| Jingmen   | Hubei    | NEC | 32  | 4  | 13 | 77  | 57 | 5  | 23 | 84  | 66 | 4 | 21 | 120 |
| Shiyan    | Hubei    | NEC | 30  | 3  | 9  | 61  | 42 | 4  | 23 | 64  | 51 | 4 | 13 | 101 |
| Wuhan     | Hubei    | NEC | 32  | 3  | 13 | 62  | 53 | 4  | 24 | 76  | 47 | 2 | 19 | 64  |
| Xianning  | Hubei    | NEC | 31  | 3  | 10 | 62  | 57 | 3  | 25 | 69  | 44 | 2 | 18 | 61  |
| Xiangyang | Hubei    | NEC | 33  | 4  | 10 | 74  | 45 | 4  | 24 | 74  | 55 | 4 | 19 | 94  |
| Xiaogan   | Hubei    | NEC | 36  | 3  | 19 | 61  | 57 | 3  | 31 | 76  | 53 | 3 | 30 | 85  |
| Yichang   | Hubei    | NEC | 29  | 4  | 10 | 74  | 48 | 4  | 26 | 84  | 48 | 4 | 10 | 79  |
| Anqing    | Anhui    | NEC | 38  | 3  | 14 | 58  | 35 | 3  | 14 | 58  | 39 | 2 | 11 | 57  |
| Bengbu    | Anhui    | NEC | 41  | 4  | 12 | 71  | 55 | 4  | 18 | 76  | 52 | 4 | 13 | 103 |
| Bozhou    | Anhui    | NEC | 34  | 3  | 19 | 63  | 63 | 5  | 28 | 103 | 61 | 4 | 16 | 114 |
| Chuzhou   | Anhui    | NEC | 42  | 4  | 14 | 77  | 52 | 5  | 22 | 80  | 48 | 3 | 27 | 87  |
| Fuyang    | Anhui    | NEC | 31  | 3  | 13 | 61  | 47 | 3  | 25 | 76  | 37 | 3 | 10 | 71  |
| Hefei     | Anhui    | NEC | 35  | 4  | 8  | 60  | 43 | 4  | 13 | 65  | 40 | 3 | 15 | 63  |
| Huaibei   | Anhui    | NEC | 37  | 4  | 14 | 86  | 41 | 2  | 22 | 51  | 45 | 4 | 16 | 85  |

|             |              |     |    |   |    |     |    |   |    |     |    |   |    |     |
|-------------|--------------|-----|----|---|----|-----|----|---|----|-----|----|---|----|-----|
| Huainan     | Anhui        | NEC | 23 | 3 | 6  | 53  | 41 | 4 | 9  | 62  | 40 | 4 | 7  | 89  |
| Huangshan   | Anhui        | NEC | 22 | 2 | 6  | 37  | 35 | 5 | 10 | 62  | 28 | 2 | 10 | 45  |
| Lu'an       | Anhui        | NEC | 37 | 3 | 12 | 67  | 50 | 2 | 34 | 64  | 40 | 2 | 11 | 55  |
| Ma'anshan   | Anhui        | NEC | 38 | 3 | 16 | 58  | 50 | 5 | 21 | 85  | 40 | 2 | 24 | 69  |
| Suzhou      | Anhui        | NEC | 56 | 7 | 22 | 111 | 58 | 4 | 34 | 79  | 58 | 6 | 16 | 151 |
| Tongling    | Anhui        | NEC | 42 | 4 | 14 | 80  | 54 | 5 | 24 | 85  | 34 | 2 | 19 | 51  |
| Wuhu        | Anhui        | NEC | 30 | 3 | 10 | 52  | 44 | 4 | 17 | 70  | 41 | 3 | 21 | 68  |
| Changzhou   | Jiangsu      | NEC | 31 | 3 | 11 | 67  | 40 | 5 | 8  | 61  | 29 | 2 | 16 | 63  |
| Huaian      | Jiangsu      | NEC | 32 | 3 | 10 | 59  | 45 | 4 | 12 | 74  | 29 | 2 | 10 | 60  |
| Lianyungang | Jiangsu      | NEC | 33 | 4 | 9  | 64  | 42 | 5 | 13 | 90  | 31 | 4 | 6  | 85  |
| Nanjing     | Jiangsu      | NEC | 29 | 3 | 7  | 47  | 39 | 4 | 13 | 63  | 28 | 2 | 14 | 63  |
| Nantong     | Jiangsu      | NEC | 34 | 4 | 10 | 62  | 42 | 6 | 10 | 96  | 33 | 3 | 15 | 74  |
| Suzhou      | Jiangsu      | NEC | 33 | 3 | 9  | 54  | 54 | 7 | 15 | 96  | 36 | 3 | 13 | 78  |
| Suqian      | Jiangsu      | NEC | 37 | 3 | 12 | 67  | 45 | 3 | 18 | 71  | 37 | 4 | 8  | 103 |
| Taizhou     | Jiangsu      | NEC | 36 | 4 | 10 | 68  | 38 | 4 | 13 | 62  | 34 | 3 | 16 | 64  |
| Wuxi        | Jiangsu      | NEC | 35 | 3 | 12 | 59  | 52 | 6 | 15 | 90  | 38 | 2 | 18 | 77  |
| Xuzhou      | Jiangsu      | NEC | 31 | 3 | 10 | 56  | 38 | 2 | 26 | 52  | 36 | 4 | 14 | 84  |
| Yanchen     | Jiangsu      | NEC | 30 | 4 | 8  | 67  | 29 | 3 | 8  | 49  | 23 | 2 | 10 | 58  |
| Yangzhou    | Jiangsu      | NEC | 31 | 3 | 9  | 57  | 38 | 3 | 17 | 55  | 30 | 3 | 11 | 67  |
| Zhenjiang   | Jiangsu      | NEC | 38 | 4 | 10 | 65  | 46 | 5 | 15 | 70  | 37 | 3 | 17 | 80  |
| Shanghai    | Municipality | NEC | 31 | 3 | 9  | 54  | 56 | 8 | 11 | 122 | 30 | 2 | 10 | 71  |
| Hangzhou    | Zhejiang     | NEC | 32 | 3 | 9  | 63  | 43 | 5 | 12 | 74  | 39 | 3 | 12 | 69  |
| Huzhou      | Zhejiang     | NEC | 31 | 2 | 17 | 54  | 49 | 5 | 20 | 77  | 34 | 2 | 17 | 78  |
| Jiaxing     | Zhejiang     | NEC | 32 | 3 | 10 | 47  | 52 | 6 | 16 | 99  | 37 | 3 | 13 | 85  |
| Jinhua      | Zhejiang     | NEC | 33 | 3 | 13 | 57  | 53 | 6 | 19 | 100 | 47 | 4 | 16 | 93  |
| Lishui      | Zhejiang     | NEC | 23 | 2 | 6  | 33  | 30 | 3 | 14 | 45  | 32 | 4 | 5  | 77  |

|             |          |     |    |   |    |    |    |   |    |     |    |   |    |     |
|-------------|----------|-----|----|---|----|----|----|---|----|-----|----|---|----|-----|
| Ningbo      | Zhejiang | NEC | 23 | 2 | 9  | 37 | 36 | 5 | 10 | 73  | 31 | 2 | 14 | 62  |
| Quzhou      | Zhejiang | NEC | 33 | 3 | 13 | 57 | 52 | 6 | 19 | 81  | 37 | 3 | 15 | 66  |
| Shaoxing    | Zhejiang | NEC | 33 | 3 | 12 | 63 | 57 | 7 | 21 | 113 | 43 | 3 | 11 | 70  |
| Taizhou     | Zhejiang | NEC | 25 | 2 | 10 | 40 | 29 | 4 | 8  | 61  | 30 | 2 | 16 | 67  |
| Wenjiang    | Zhejiang | NEC | 30 | 2 | 15 | 42 | 30 | 3 | 12 | 47  | 31 | 2 | 15 | 52  |
| Zhoushan    | Zhejiang | NEC | 17 | 1 | 8  | 30 | 23 | 3 | 7  | 47  | 19 | 2 | 11 | 48  |
| Fuzhou      | Jiangxi  | NEC | 28 | 2 | 15 | 50 | 44 | 4 | 16 | 74  | 41 | 2 | 15 | 60  |
| Ganzhou     | Jiangxi  | NEC | 38 | 3 | 20 | 63 | 44 | 4 | 24 | 73  | 44 | 2 | 28 | 67  |
| Ji'an       | Jiangxi  | NEC | 32 | 3 | 15 | 56 | 41 | 4 | 19 | 65  | 43 | 2 | 18 | 61  |
| Jingdezhen  | Jiangxi  | NEC | 31 | 2 | 14 | 47 | 45 | 4 | 17 | 66  | 32 | 2 | 13 | 54  |
| Jiujiang    | Jiangxi  | NEC | 31 | 3 | 9  | 49 | 48 | 4 | 24 | 69  | 35 | 2 | 10 | 51  |
| Nanchang    | Jiangxi  | NEC | 23 | 2 | 8  | 36 | 40 | 4 | 10 | 68  | 29 | 2 | 7  | 55  |
| Pingxiang   | Jiangxi  | NEC | 23 | 2 | 13 | 40 | 49 | 5 | 15 | 78  | 44 | 3 | 18 | 62  |
| Shangrao    | Jiangxi  | NEC | 41 | 3 | 19 | 61 | 38 | 4 | 20 | 71  | 32 | 2 | 17 | 65  |
| Xinyu       | Jiangxi  | NEC | 25 | 2 | 10 | 36 | 38 | 4 | 15 | 59  | 34 | 2 | 11 | 47  |
| Yichun      | Jiangxi  | NEC | 31 | 1 | 25 | 49 | 48 | 2 | 28 | 62  | 43 | 2 | 27 | 53  |
| Yingtian    | Jiangxi  | NEC | 21 | 2 | 6  | 42 | 39 | 4 | 20 | 66  | 39 | 3 | 11 | 62  |
| Changsha    | Hunan    | NEC | 27 | 2 | 14 | 49 | 59 | 4 | 21 | 86  | 48 | 3 | 15 | 89  |
| Changde     | Hunan    | NEC | 22 | 2 | 6  | 43 | 31 | 2 | 11 | 43  | 32 | 2 | 9  | 56  |
| Chenzhou    | Hunan    | NEC | 27 | 2 | 12 | 48 | 45 | 8 | 12 | 126 | 47 | 4 | 15 | 84  |
| Huaihua     | Hunan    | NEC | 21 | 1 | 13 | 33 | 49 | 4 | 17 | 76  | 45 | 4 | 14 | 101 |
| Loudi       | Hunan    | NEC | 28 | 2 | 15 | 40 | 54 | 3 | 21 | 71  | 44 | 3 | 15 | 90  |
| Xiangtan    | Hunan    | NEC | 27 | 2 | 15 | 46 | 58 | 4 | 22 | 79  | 49 | 3 | 15 | 92  |
| Yiyang      | Hunan    | NEC | 28 | 2 | 17 | 51 | 49 | 3 | 19 | 68  | 45 | 2 | 18 | 65  |
| Yongzhou    | Hunan    | NEC | 37 | 2 | 25 | 55 | 44 | 3 | 22 | 63  | 54 | 5 | 24 | 133 |
| Zhangjiajie | Hunan    | NEC | 23 | 3 | 9  | 56 | 45 | 4 | 17 | 71  | 43 | 3 | 8  | 67  |

|           |           |     |    |   |    |    |    |   |    |    |    |   |    |    |
|-----------|-----------|-----|----|---|----|----|----|---|----|----|----|---|----|----|
| Zhuzhou   | Hunan     | NEC | 22 | 1 | 11 | 34 | 50 | 4 | 21 | 85 | 40 | 2 | 13 | 58 |
| Dongguan  | Guangdong | NEC | 26 | 2 | 11 | 45 | 35 | 3 | 16 | 57 | 39 | 2 | 19 | 68 |
| Foshan    | Guangdong | NEC | 34 | 3 | 20 | 59 | 44 | 4 | 18 | 75 | 38 | 2 | 17 | 55 |
| Guangzhou | Guangdong | NEC | 34 | 2 | 17 | 47 | 39 | 3 | 19 | 63 | 41 | 2 | 23 | 63 |
| Heyuan    | Guangdong | NEC | 25 | 2 | 10 | 37 | 31 | 4 | 12 | 54 | 38 | 2 | 14 | 59 |
| Huizhou   | Guangdong | NEC | 22 | 2 | 10 | 39 | 25 | 4 | 7  | 44 | 24 | 2 | 6  | 48 |
| Jiangmen  | Guangdong | NEC | 19 | 2 | 10 | 39 | 36 | 5 | 12 | 67 | 33 | 2 | 15 | 55 |
| Maoming   | Guangdong | NEC | 19 | 3 | 5  | 56 | 28 | 6 | 4  | 65 | 25 | 3 | 9  | 52 |
| Meizhou   | Guangdong | NEC | 23 | 2 | 9  | 43 | 26 | 3 | 9  | 48 | 35 | 2 | 14 | 62 |
| Qingyuan  | Guangdong | NEC | 32 | 3 | 17 | 62 | 32 | 4 | 14 | 59 | 30 | 3 | 11 | 91 |
| Shantou   | Guangdong | NEC | 24 | 2 | 12 | 38 | 25 | 3 | 13 | 43 | 29 | 2 | 16 | 50 |
| Shaoguan  | Guangdong | NEC | 30 | 2 | 15 | 56 | 32 | 4 | 13 | 59 | 40 | 3 | 10 | 73 |
| Shenzhen  | Guangdong | NEC | 20 | 2 | 8  | 48 | 27 | 4 | 11 | 47 | 30 | 2 | 14 | 54 |
| Zhujiang  | Guangdong | NEC | 15 | 2 | 6  | 42 | 31 | 6 | 7  | 69 | 25 | 3 | 10 | 61 |
| Zhaoqing  | Guangdong | NEC | 30 | 2 | 15 | 53 | 40 | 4 | 17 | 73 | 40 | 3 | 16 | 68 |
| Zhongshan | Guangdong | NEC | 19 | 3 | 7  | 56 | 28 | 5 | 7  | 59 | 31 | 3 | 11 | 62 |
| Zhuhai    | Guangdong | NEC | 17 | 3 | 6  | 55 | 26 | 5 | 7  | 57 | 26 | 2 | 9  | 52 |
| Fuzhou    | Fujian    | NEC | 22 | 2 | 6  | 38 | 17 | 2 | 7  | 27 | 21 | 1 | 9  | 39 |
| Longyan   | Fujian    | NEC | 17 | 2 | 5  | 36 | 19 | 2 | 10 | 37 | 27 | 2 | 11 | 47 |
| Nanping   | Fujian    | NEC | 18 | 2 | 3  | 37 | 18 | 3 | 9  | 37 | 23 | 2 | 9  | 41 |
| Ningde    | Fujian    | NEC | 21 | 2 | 7  | 35 | 17 | 2 | 7  | 30 | 21 | 1 | 8  | 36 |
| Putian    | Fujian    | NEC | 23 | 2 | 10 | 44 | 19 | 2 | 9  | 30 | 25 | 1 | 11 | 39 |
| Quanzhou  | Fujian    | NEC | 20 | 2 | 7  | 33 | 16 | 1 | 9  | 26 | 23 | 1 | 10 | 39 |
| Sanming   | Fujian    | NEC | 21 | 2 | 4  | 38 | 22 | 3 | 11 | 44 | 25 | 2 | 7  | 41 |
| Xiamen    | Fujian    | NEC | 21 | 2 | 10 | 36 | 19 | 1 | 12 | 30 | 27 | 1 | 11 | 40 |
| Zhangzhou | Fujian    | NEC | 20 | 2 | 8  | 44 | 20 | 1 | 14 | 29 | 26 | 1 | 9  | 45 |



|           |              |     |    |   |    |    |    |   |    |     |    |   |    |     |
|-----------|--------------|-----|----|---|----|----|----|---|----|-----|----|---|----|-----|
| Haikou    | Hainan       | NEC | 12 | 1 | 7  | 25 | 20 | 3 | 7  | 48  | 16 | 2 | 4  | 41  |
| Sanya     | Hainan       | NEC | 10 | 0 | 6  | 13 | 11 | 1 | 6  | 19  | 12 | 1 | 4  | 21  |
| Chongqing | Municipality | NEC | 34 | 3 | 11 | 64 | 53 | 3 | 24 | 71  | 30 | 3 | 10 | 61  |
| Bazhong   | Sichuan      | NEC | 17 | 1 | 8  | 25 | 23 | 2 | 14 | 36  | 20 | 2 | 6  | 34  |
| Chengdu   | Sichuan      | NEC | 33 | 4 | 9  | 75 | 54 | 4 | 30 | 78  | 31 | 3 | 9  | 88  |
| Dazhou    | Sichuan      | NEC | 32 | 2 | 13 | 50 | 62 | 4 | 33 | 85  | 43 | 3 | 16 | 66  |
| Deyang    | Sichuan      | NEC | 31 | 3 | 12 | 58 | 53 | 5 | 28 | 94  | 27 | 2 | 9  | 65  |
| Guangyuan | Sichuan      | NEC | 13 | 2 | 4  | 52 | 13 | 1 | 8  | 18  | 9  | 1 | 4  | 16  |
| Leshan    | Sichuan      | NEC | 29 | 4 | 7  | 82 | 55 | 6 | 23 | 105 | 32 | 3 | 12 | 96  |
| Luzhou    | Sichuan      | NEC | 36 | 5 | 6  | 84 | 57 | 8 | 13 | 111 | 27 | 2 | 9  | 52  |
| Meishan   | Sichuan      | NEC | 32 | 4 | 8  | 63 | 51 | 6 | 25 | 100 | 28 | 4 | 8  | 117 |
| Mianyang  | Sichuan      | NEC | 25 | 2 | 8  | 40 | 41 | 3 | 19 | 70  | 21 | 2 | 3  | 49  |
| Nanchong  | Sichuan      | NEC | 36 | 3 | 15 | 59 | 50 | 3 | 28 | 65  | 38 | 3 | 18 | 77  |
| Panzhihua | Sichuan      | NEC | 22 | 1 | 12 | 32 | 28 | 2 | 17 | 40  | 24 | 1 | 9  | 35  |
| Suining   | Sichuan      | NEC | 29 | 3 | 8  | 51 | 47 | 3 | 18 | 71  | 30 | 3 | 10 | 71  |
| Ya'an     | Sichuan      | NEC | 15 | 2 | 6  | 36 | 16 | 1 | 10 | 25  | 19 | 2 | 7  | 49  |
| Ziyang    | Sichuan      | NEC | 18 | 1 | 12 | 31 | 25 | 2 | 15 | 42  | 16 | 1 | 11 | 34  |
| Zigong    | Sichuan      | NEC | 37 | 4 | 17 | 80 | 57 | 6 | 29 | 88  | 38 | 3 | 15 | 86  |
| Baoshan   | Yunnan       | NEC | 20 | 1 | 13 | 34 | 18 | 1 | 14 | 23  | 17 | 1 | 11 | 22  |
| Chuxiong  | Yunnan       | NEC | 14 | 1 | 5  | 26 | 24 | 3 | 6  | 45  | 12 | 1 | 4  | 24  |
| Dali      | Yunnan       | NEC | 13 | 2 | 4  | 31 | 13 | 1 | 9  | 24  | 11 | 0 | 8  | 15  |
| Dehong    | Yunnan       | NEC | 21 | 1 | 13 | 33 | 19 | 1 | 12 | 32  | 21 | 1 | 12 | 32  |
| Honghe    | Yunnan       | NEC | 19 | 4 | 5  | 78 | 34 | 4 | 14 | 68  | 21 | 2 | 10 | 46  |
| Kunming   | Yunnan       | NEC | 18 | 2 | 9  | 38 | 27 | 3 | 12 | 43  | 20 | 1 | 9  | 37  |
| Lijiang   | Yunnan       | NEC | 15 | 0 | 14 | 22 | 16 | 0 | 14 | 19  | 17 | 1 | 14 | 31  |
| Lincang   | Yunnan       | NEC | 15 | 1 | 8  | 26 | 17 | 1 | 14 | 24  | 19 | 1 | 13 | 31  |

|               |         |     |    |   |    |    |    |   |    |    |    |   |    |    |
|---------------|---------|-----|----|---|----|----|----|---|----|----|----|---|----|----|
| Nujiang       | Yunnan  | NEC | 12 | 0 | 8  | 15 | 13 | 0 | 11 | 16 | 13 | 0 | 8  | 16 |
| Qujing        | Yunnan  | NEC | 23 | 2 | 8  | 44 | 34 | 3 | 16 | 51 | 23 | 1 | 6  | 35 |
| Wenshan       | Yunnan  | NEC | 27 | 2 | 17 | 48 | 40 | 2 | 28 | 53 | 26 | 1 | 16 | 40 |
| Xishuangbanna | Yunnan  | NEC | 7  | 1 | 2  | 13 | 16 | 1 | 5  | 23 | 16 | 1 | 6  | 28 |
| Tuxi          | Yunnan  | NEC | 13 | 1 | 5  | 25 | 26 | 3 | 8  | 40 | 17 | 1 | 7  | 31 |
| Zhaotong      | Yunnan  | NEC | 31 | 3 | 15 | 56 | 37 | 4 | 10 | 68 | 14 | 1 | 7  | 35 |
| Anshun        | Guizhou | NEC | 19 | 1 | 14 | 33 | 34 | 3 | 17 | 57 | 21 | 1 | 14 | 40 |
| Bijie         | Guizhou | NEC | 18 | 2 | 6  | 32 | 29 | 3 | 4  | 48 | 16 | 2 | 5  | 38 |
| Guiyang       | Guizhou | NEC | 19 | 2 | 7  | 42 | 41 | 3 | 10 | 60 | 25 | 2 | 9  | 55 |
| Liupanshui    | Guizhou | NEC | 26 | 3 | 11 | 52 | 42 | 5 | 11 | 67 | 21 | 2 | 8  | 38 |
| Tongren       | Guizhou | NEC | 15 | 0 | 13 | 16 | 19 | 1 | 14 | 29 | 22 | 2 | 13 | 47 |
| Zunyi         | Guizhou | NEC | 19 | 2 | 7  | 37 | 35 | 3 | 15 | 58 | 28 | 2 | 9  | 58 |
| Baise         | Guangxi | NEC | 28 | 3 | 7  | 63 | 37 | 4 | 6  | 59 | 31 | 3 | 11 | 55 |
| Beihai        | Guangxi | NEC | 16 | 2 | 6  | 42 | 24 | 5 | 5  | 59 | 22 | 2 | 9  | 53 |
| Chongzuo      | Guangxi | NEC | 20 | 2 | 5  | 38 | 29 | 5 | 7  | 63 | 24 | 2 | 8  | 52 |
| Fangchenggang | Guangxi | NEC | 18 | 2 | 7  | 46 | 26 | 6 | 7  | 66 | 23 | 2 | 11 | 50 |
| Guigang       | Guangxi | NEC | 37 | 3 | 17 | 73 | 39 | 7 | 11 | 85 | 31 | 2 | 14 | 52 |
| Guilin        | Guangxi | NEC | 25 | 2 | 14 | 41 | 43 | 5 | 10 | 66 | 52 | 4 | 19 | 87 |
| Hechi         | Guangxi | NEC | 28 | 3 | 16 | 55 | 42 | 5 | 11 | 70 | 35 | 4 | 6  | 86 |
| Hezhou        | Guangxi | NEC | 31 | 2 | 20 | 44 | 37 | 6 | 10 | 72 | 31 | 2 | 9  | 46 |
| Laibin        | Guangxi | NEC | 34 | 3 | 15 | 70 | 39 | 6 | 11 | 80 | 35 | 3 | 8  | 68 |
| Liuzhou       | Guangxi | NEC | 34 | 3 | 16 | 68 | 45 | 7 | 14 | 83 | 42 | 4 | 17 | 77 |
| Nanning       | Guangxi | NEC | 27 | 4 | 8  | 62 | 37 | 7 | 7  | 70 | 29 | 3 | 8  | 61 |
| Qinzhou       | Guangxi | NEC | 22 | 3 | 10 | 47 | 29 | 6 | 7  | 69 | 26 | 3 | 11 | 55 |
| Wuzhou        | Guangxi | NEC | 32 | 3 | 19 | 56 | 36 | 5 | 13 | 60 | 34 | 2 | 14 | 55 |
| Yulin         | Guangxi | NEC | 30 | 3 | 11 | 53 | 32 | 5 | 13 | 65 | 29 | 2 | 14 | 50 |

|          |         |     |    |   |    |    |    |   |    |    |    |   |    |    |
|----------|---------|-----|----|---|----|----|----|---|----|----|----|---|----|----|
| Golog    | Qinghai | NEC | 34 | 2 | 22 | 47 | 49 | 3 | 40 | 80 | 23 | 3 | 3  | 53 |
| Haidong  | Qinghai | NEC | 41 | 2 | 28 | 56 | 42 | 4 | 29 | 72 | 35 | 1 | 24 | 44 |
| Xining   | Qinghai | NEC | 33 | 2 | 15 | 62 | 33 | 2 | 25 | 48 | 32 | 2 | 12 | 64 |
| Ali      | Tibet   | NEC | 14 | 2 | 7  | 33 | 11 | 1 | 5  | 21 | 14 | 1 | 7  | 21 |
| Qamdo    | Tibet   | NEC | 17 | 1 | 9  | 35 | 14 | 1 | 8  | 18 | 15 | 1 | 5  | 26 |
| Lhasa    | Tibet   | NEC | 18 | 1 | 10 | 36 | 19 | 2 | 12 | 39 | 17 | 1 | 11 | 28 |
| Nyingchi | Tibet   | NEC | 8  | 0 | 5  | 12 | 6  | 0 | 5  | 8  | 6  | 0 | 4  | 13 |
| Naqu     | Tibet   | NEC | 35 | 4 | 16 | 77 | 40 | 4 | 26 | 68 | 47 | 2 | 27 | 65 |
| Shigatse | Tibet   | NEC | 16 | 2 | 5  | 37 | 13 | 1 | 7  | 26 | 14 | 1 | 5  | 28 |
| Lhoka    | Tibet   | NEC | 9  | 1 | 3  | 14 | 5  | 0 | 4  | 7  | 8  | 0 | 3  | 14 |

118 <sup>a</sup> EC and NEC denote emission control and non-emission control regions, respectively, of which the latter means regions without implementation  
119 of emission control measures.

120 <sup>b</sup> The pre-Parade Blue, Parade Blue, and post-Parade Blue periods indicate the periods of 1-19 August, 20 August-3 September, and 4-30  
121 September 2015, respectively.

122

123

124

125

126

127

128

129

130 **Table S3.** Summary of daily average PM<sub>10</sub> concentrations ( $\mu\text{g m}^{-3}$ ) during the pre-Parade Blue, Parade Blue and post-Parade Blue periods in the  
 131 291 cities across China

| City         | Province     | Region <sup>a</sup> | Pre-Parade Blue period <sup>b</sup> |    |     |     | Parade Blue period <sup>b</sup> |    |     |     | Post-Parade Blue period <sup>b</sup> |    |     |     |
|--------------|--------------|---------------------|-------------------------------------|----|-----|-----|---------------------------------|----|-----|-----|--------------------------------------|----|-----|-----|
|              |              |                     | Mean                                | SE | Min | Max | Mean                            | SE | Min | Max | Mean                                 | SE | Min | Max |
| Beijing      | Municipality | EC                  | 87                                  | 8  | 44  | 176 | 29                              | 3  | 13  | 51  | 65                                   | 9  | 11  | 163 |
| Tianjing     | Municipality | EC                  | 111                                 | 8  | 57  | 200 | 58                              | 7  | 23  | 125 | 78                                   | 7  | 23  | 148 |
| Baoding      | Hebei        | EC                  | 152                                 | 10 | 61  | 241 | 70                              | 8  | 33  | 142 | 115                                  | 12 | 36  | 250 |
| Cangzhou     | Hebei        | EC                  | 87                                  | 8  | 44  | 176 | 29                              | 3  | 13  | 51  | 70                                   | 8  | 17  | 152 |
| Chengde      | Hebei        | EC                  | 72                                  | 5  | 43  | 121 | 32                              | 2  | 23  | 46  | 58                                   | 7  | 20  | 154 |
| Handan       | Hebei        | EC                  | 157                                 | 11 | 84  | 245 | 104                             | 14 | 23  | 194 | 124                                  | 10 | 26  | 224 |
| Hengshui     | Hebei        | EC                  | 121                                 | 9  | 51  | 221 | 69                              | 9  | 12  | 141 | 132                                  | 13 | 32  | 273 |
| Langfang     | Hebei        | EC                  | 131                                 | 9  | 47  | 200 | 56                              | 8  | 21  | 147 | 106                                  | 12 | 23  | 229 |
| Qinhuangdao  | Hebei        | EC                  | 90                                  | 8  | 30  | 175 | 25                              | 3  | 13  | 54  | 52                                   | 6  | 20  | 119 |
| Shijiazhuang | Hebei        | EC                  | 136                                 | 11 | 41  | 212 | 70                              | 8  | 16  | 127 | 91                                   | 8  | 29  | 181 |
| Tangshan     | Hebei        | EC                  | 124                                 | 9  | 52  | 187 | 35                              | 4  | 14  | 68  | 87                                   | 8  | 27  | 163 |
| Xingtai      | Hebei        | EC                  | 127                                 | 9  | 65  | 208 | 81                              | 11 | 20  | 162 | 120                                  | 10 | 42  | 219 |
| Zhangjiakou  | Hebei        | EC                  | 70                                  | 14 | 37  | 320 | 40                              | 3  | 16  | 54  | 59                                   | 7  | 22  | 134 |
| Changzhi     | Shanxi       | EC                  | 89                                  | 7  | 34  | 148 | 63                              | 4  | 41  | 86  | 75                                   | 5  | 32  | 133 |
| Datong       | Shanxi       | EC                  | 70                                  | 11 | 36  | 250 | 44                              | 3  | 24  | 66  | 54                                   | 5  | 20  | 117 |
| Jincheng     | Shanxi       | EC                  | 92                                  | 7  | 28  | 139 | 73                              | 7  | 39  | 140 | 75                                   | 6  | 24  | 179 |
| Jinzhong     | Shanxi       | EC                  | 64                                  | 5  | 32  | 117 | 52                              | 4  | 29  | 86  | 66                                   | 6  | 19  | 126 |
| Linfen       | Shanxi       | EC                  | 58                                  | 4  | 39  | 118 | 45                              | 4  | 25  | 70  | 60                                   | 4  | 23  | 94  |
| Lvliang      | Shanxi       | EC                  | 66                                  | 4  | 31  | 101 | 46                              | 2  | 34  | 62  | 62                                   | 4  | 33  | 105 |
| Shuozhou     | Shanxi       | EC                  | 91                                  | 7  | 47  | 169 | 64                              | 4  | 39  | 96  | 60                                   | 6  | 24  | 128 |
| Taiyuan      | Shanxi       | EC                  | 92                                  | 7  | 45  | 169 | 58                              | 5  | 25  | 97  | 87                                   | 9  | 23  | 186 |

|             |                |    |     |    |    |     |     |    |    |     |     |    |    |     |
|-------------|----------------|----|-----|----|----|-----|-----|----|----|-----|-----|----|----|-----|
| Xinzhou     | Shanxi         | EC | 67  | 4  | 45 | 118 | 42  | 2  | 30 | 51  | 64  | 6  | 24 | 130 |
| Yangquan    | Shanxi         | EC | 74  | 5  | 36 | 120 | 49  | 4  | 25 | 68  | 69  | 6  | 18 | 128 |
| Yuncheng    | Shanxi         | EC | 92  | 11 | 38 | 242 | 74  | 6  | 43 | 113 | 55  | 3  | 26 | 102 |
| Binzhou     | Shandong       | EC | 86  | 7  | 27 | 144 | 59  | 6  | 32 | 118 | 89  | 9  | 25 | 215 |
| Dezhou      | Shandong       | EC | 137 | 9  | 41 | 204 | 71  | 8  | 25 | 140 | 113 | 11 | 32 | 238 |
| Dongying    | Shandong       | EC | 109 | 11 | 35 | 196 | 79  | 7  | 44 | 130 | 98  | 9  | 38 | 210 |
| Jinan       | Shandong       | EC | 101 | 7  | 37 | 137 | 85  | 7  | 50 | 135 | 135 | 9  | 53 | 217 |
| Jining      | Shandong       | EC | 80  | 8  | 42 | 154 | 85  | 6  | 52 | 131 | 100 | 6  | 52 | 185 |
| Laiwu       | Shandong       | EC | 91  | 9  | 40 | 153 | 96  | 7  | 57 | 156 | 103 | 8  | 41 | 200 |
| Liaocheng   | Shandong       | EC | 135 | 12 | 47 | 223 | 101 | 11 | 32 | 169 | 132 | 9  | 45 | 216 |
| Linyi       | Shandong       | EC | 91  | 10 | 36 | 173 | 91  | 8  | 55 | 174 | 101 | 11 | 29 | 262 |
| Qingdao     | Shandong       | EC | 75  | 5  | 37 | 115 | 68  | 6  | 40 | 135 | 63  | 4  | 35 | 141 |
| Rizhao      | Shandong       | EC | 69  | 6  | 24 | 123 | 70  | 7  | 29 | 128 | 71  | 7  | 24 | 158 |
| Tai'an      | Shandong       | EC | 85  | 9  | 39 | 163 | 85  | 7  | 46 | 140 | 103 | 8  | 44 | 196 |
| Weihai      | Shandong       | EC | 69  | 6  | 39 | 123 | 41  | 3  | 21 | 59  | 41  | 3  | 21 | 73  |
| Weifang     | Shandong       | EC | 101 | 9  | 47 | 177 | 99  | 12 | 44 | 198 | 100 | 9  | 39 | 253 |
| Yantai      | Shandong       | EC | 75  | 7  | 36 | 141 | 50  | 4  | 23 | 75  | 53  | 4  | 29 | 120 |
| Zaozhuang   | Shandong       | EC | 92  | 8  | 46 | 148 | 98  | 5  | 69 | 135 | 117 | 9  | 28 | 245 |
| Zibo        | Shandong       | EC | 109 | 7  | 56 | 159 | 106 | 9  | 63 | 164 | 129 | 10 | 49 | 241 |
| Alxa League | Inner Mongolia | EC | 96  | 9  | 56 | 195 | 67  | 4  | 33 | 93  | 57  | 7  | 10 | 160 |
| Bayannur    | Inner Mongolia | EC | 82  | 8  | 43 | 193 | 67  | 3  | 54 | 94  | 72  | 5  | 37 | 155 |
| Baotou      | Inner Mongolia | EC | 86  | 8  | 35 | 165 | 62  | 3  | 39 | 90  | 71  | 7  | 20 | 145 |
| Chifeng     | Inner Mongolia | EC | 59  | 7  | 34 | 156 | 35  | 2  | 24 | 49  | 56  | 5  | 17 | 122 |
| Ordos       | Inner Mongolia | EC | 54  | 7  | 20 | 148 | 36  | 2  | 28 | 51  | 46  | 4  | 18 | 97  |
| Hohhot      | Inner Mongolia | EC | 87  | 8  | 46 | 207 | 54  | 4  | 33 | 80  | 73  | 8  | 16 | 154 |
| Hulun Buir  | Inner Mongolia | EC | 53  | 7  | 16 | 127 | 65  | 5  | 36 | 99  | 54  | 5  | 19 | 115 |

|                |                |     |     |    |    |     |     |    |    |     |     |    |    |     |
|----------------|----------------|-----|-----|----|----|-----|-----|----|----|-----|-----|----|----|-----|
| Tongliao       | Inner Mongolia | EC  | 95  | 8  | 56 | 165 | 62  | 4  | 46 | 99  | 65  | 6  | 31 | 154 |
| Wuhai          | Inner Mongolia | EC  | 104 | 12 | 43 | 280 | 67  | 5  | 33 | 104 | 97  | 8  | 38 | 216 |
| Hinggan League | Inner Mongolia | EC  | 61  | 3  | 41 | 82  | 43  | 2  | 34 | 53  | 45  | 3  | 21 | 89  |
| Anyang         | Henan          | EC  | 100 | 7  | 49 | 169 | 82  | 9  | 39 | 151 | 118 | 9  | 45 | 256 |
| Hebi           | Henan          | EC  | 99  | 6  | 59 | 144 | 66  | 8  | 27 | 132 | 98  | 8  | 34 | 193 |
| Jiaozuo        | Henan          | EC  | 84  | 6  | 40 | 137 | 71  | 8  | 18 | 123 | 66  | 5  | 33 | 123 |
| Kaifeng        | Henan          | EC  | 76  | 5  | 46 | 131 | 68  | 7  | 35 | 130 | 101 | 7  | 33 | 186 |
| Luoyang        | Henan          | EC  | 96  | 11 | 34 | 223 | 72  | 5  | 31 | 101 | 75  | 5  | 36 | 134 |
| Luohe          | Henan          | EC  | 80  | 6  | 42 | 117 | 99  | 7  | 57 | 141 | 139 | 8  | 73 | 271 |
| Nanyang        | Henan          | EC  | 93  | 6  | 48 | 140 | 109 | 7  | 67 | 148 | 104 | 7  | 57 | 176 |
| Pingdingshan   | Henan          | EC  | 91  | 8  | 42 | 148 | 91  | 6  | 61 | 133 | 114 | 8  | 52 | 217 |
| Sanmenxia      | Henan          | EC  | 100 | 12 | 29 | 255 | 72  | 5  | 42 | 112 | 71  | 5  | 24 | 112 |
| Shangqiu       | Henan          | EC  | 65  | 6  | 30 | 141 | 65  | 6  | 31 | 112 | 83  | 7  | 40 | 158 |
| Xinyang        | Henan          | EC  | 56  | 5  | 30 | 104 | 78  | 4  | 45 | 103 | 86  | 6  | 30 | 135 |
| Zhengzhou      | Henan          | EC  | 107 | 9  | 44 | 187 | 97  | 12 | 37 | 193 | 135 | 10 | 50 | 255 |
| Zhoukou        | Henan          | EC  | 57  | 4  | 29 | 92  | 68  | 5  | 36 | 94  | 103 | 7  | 48 | 193 |
| Zhumadian      | Henan          | EC  | 78  | 6  | 47 | 125 | 88  | 8  | 32 | 128 | 100 | 8  | 32 | 196 |
| Anshan         | Liaoning       | NEC | 61  | 5  | 24 | 101 | 70  | 4  | 52 | 101 | 76  | 5  | 38 | 139 |
| Benxi          | Liaoning       | NEC | 57  | 5  | 29 | 108 | 57  | 3  | 29 | 80  | 67  | 4  | 27 | 112 |
| Chaoyang       | Liaoning       | NEC | 61  | 6  | 34 | 139 | 41  | 2  | 30 | 56  | 64  | 5  | 24 | 146 |
| Dalian         | Liaoning       | NEC | 67  | 8  | 25 | 141 | 46  | 4  | 22 | 81  | 49  | 4  | 22 | 97  |
| Dandong        | Liaoning       | NEC | 28  | 7  | 0  | 90  | 36  | 2  | 19 | 49  | 50  | 3  | 19 | 84  |
| Fushun         | Liaoning       | NEC | 47  | 4  | 25 | 90  | 36  | 3  | 19 | 53  | 60  | 5  | 19 | 98  |
| Fuxin          | Liaoning       | NEC | 72  | 8  | 27 | 143 | 30  | 2  | 17 | 49  | 54  | 4  | 22 | 117 |
| Huludao        | Liaoning       | NEC | 94  | 12 | 31 | 191 | 45  | 3  | 33 | 75  | 62  | 5  | 22 | 128 |
| Jinzhou        | Liaoning       | NEC | 83  | 10 | 38 | 174 | 37  | 3  | 29 | 67  | 60  | 4  | 28 | 114 |



|              |              |     |    |   |    |     |    |   |    |     |    |   |    |     |
|--------------|--------------|-----|----|---|----|-----|----|---|----|-----|----|---|----|-----|
| Liaoyang     | Liaoning     | NEC | 60 | 5 | 21 | 103 | 64 | 3 | 44 | 82  | 78 | 6 | 32 | 140 |
| Panjin       | Liaoning     | NEC | 63 | 8 | 23 | 141 | 33 | 3 | 25 | 69  | 44 | 3 | 22 | 78  |
| Shenyang     | Liaoning     | NEC | 62 | 5 | 30 | 99  | 46 | 3 | 30 | 69  | 69 | 5 | 27 | 130 |
| Tieling      | Liaoning     | NEC | 48 | 4 | 26 | 83  | 34 | 2 | 15 | 45  | 66 | 5 | 28 | 119 |
| Wafangdian   | Liaoning     | NEC | 57 | 6 | 21 | 93  | 45 | 3 | 25 | 69  | 55 | 4 | 18 | 92  |
| Yingkou      | Liaoning     | NEC | 54 | 5 | 23 | 109 | 44 | 7 | 14 | 122 | 39 | 5 | 8  | 106 |
| Baicheng     | Jilin        | NEC | 63 | 3 | 42 | 83  | 51 | 2 | 39 | 61  | 57 | 3 | 33 | 103 |
| Baishan      | Jilin        | NEC | 50 | 3 | 26 | 82  | 39 | 2 | 22 | 52  | 59 | 3 | 36 | 92  |
| Changchun    | Jilin        | NEC | 52 | 4 | 26 | 103 | 42 | 4 | 15 | 64  | 64 | 4 | 28 | 118 |
| Jilin        | Jilin        | NEC | 38 | 3 | 23 | 59  | 38 | 3 | 14 | 54  | 55 | 2 | 31 | 89  |
| Liaoyuan     | Jilin        | NEC | 46 | 6 | 21 | 91  | 48 | 8 | 18 | 103 | 53 | 3 | 30 | 96  |
| Siping       | Jilin        | NEC | 59 | 5 | 27 | 118 | 40 | 3 | 18 | 54  | 63 | 4 | 26 | 119 |
| Songyuan     | Jilin        | NEC | 34 | 2 | 20 | 55  | 23 | 2 | 8  | 37  | 40 | 3 | 14 | 71  |
| Daqing       | Heilongjiang | NEC | 47 | 2 | 33 | 75  | 38 | 2 | 26 | 48  | 40 | 3 | 22 | 74  |
| Daxinganling | Heilongjiang | NEC | 48 | 3 | 31 | 88  | 43 | 2 | 35 | 53  | 44 | 3 | 25 | 84  |
| Harbin       | Heilongjiang | NEC | 45 | 2 | 26 | 59  | 32 | 2 | 15 | 47  | 51 | 3 | 26 | 92  |
| Hegang       | Heilongjiang | NEC | 80 | 4 | 48 | 123 | 48 | 5 | 21 | 100 | 26 | 3 | 7  | 57  |
| Heihe        | Heilongjiang | NEC | 56 | 3 | 32 | 81  | 41 | 2 | 30 | 56  | 24 | 3 | 7  | 56  |
| Jixi         | Heilongjiang | NEC | 35 | 2 | 24 | 46  | 30 | 3 | 15 | 54  | 50 | 3 | 21 | 87  |
| Jiamusi      | Heilongjiang | NEC | 29 | 2 | 16 | 43  | 26 | 2 | 14 | 44  | 19 | 1 | 7  | 32  |
| Mudanjiang   | Heilongjiang | NEC | 38 | 1 | 27 | 53  | 45 | 2 | 31 | 59  | 55 | 3 | 34 | 92  |
| Qitaihe      | Heilongjiang | NEC | 36 | 2 | 21 | 56  | 32 | 3 | 14 | 51  | 52 | 3 | 32 | 99  |
| Qiqihar      | Heilongjiang | NEC | 47 | 3 | 30 | 68  | 42 | 2 | 31 | 56  | 45 | 3 | 24 | 91  |
| Shuangyashan | Heilongjiang | NEC | 44 | 2 | 35 | 57  | 45 | 3 | 27 | 63  | 39 | 2 | 24 | 64  |
| Suihua       | Heilongjiang | NEC | 23 | 2 | 14 | 40  | 21 | 1 | 15 | 32  | 30 | 2 | 13 | 57  |
| Ankang       | Shaanxi      | NEC | 34 | 3 | 11 | 60  | 43 | 2 | 26 | 59  | 53 | 3 | 20 | 92  |

|            |         |     |     |    |    |     |    |    |    |     |    |    |    |     |
|------------|---------|-----|-----|----|----|-----|----|----|----|-----|----|----|----|-----|
| Baoji      | Shaanxi | NEC | 87  | 14 | 31 | 286 | 73 | 5  | 42 | 113 | 69 | 5  | 18 | 122 |
| Hanzhong   | Shaanxi | NEC | 42  | 5  | 19 | 126 | 50 | 2  | 33 | 58  | 45 | 3  | 12 | 75  |
| Shangluo   | Shaanxi | NEC | 53  | 10 | 18 | 213 | 45 | 3  | 28 | 57  | 53 | 4  | 25 | 88  |
| Tongchuan  | Shaanxi | NEC | 75  | 9  | 35 | 178 | 64 | 2  | 46 | 82  | 71 | 5  | 26 | 107 |
| Weinan     | Shaanxi | NEC | 79  | 11 | 16 | 219 | 74 | 4  | 46 | 102 | 94 | 7  | 37 | 178 |
| Xi'an      | Shaanxi | NEC | 106 | 15 | 30 | 285 | 94 | 5  | 61 | 136 | 80 | 5  | 24 | 123 |
| Xianyang   | Shaanxi | NEC | 79  | 10 | 22 | 189 | 78 | 4  | 43 | 104 | 78 | 5  | 26 | 129 |
| Yan'an     | Shaanxi | NEC | 76  | 8  | 39 | 194 | 67 | 3  | 53 | 95  | 73 | 5  | 21 | 119 |
| Yulin      | Shaanxi | NEC | 70  | 8  | 26 | 160 | 59 | 5  | 39 | 97  | 63 | 5  | 19 | 133 |
| Baiying    | Gansu   | NEC | 71  | 11 | 19 | 247 | 71 | 4  | 37 | 100 | 73 | 8  | 18 | 192 |
| Dingxi     | Gansu   | NEC | 49  | 4  | 19 | 74  | 59 | 4  | 39 | 91  | 42 | 2  | 23 | 67  |
| Gannan     | Gansu   | NEC | 42  | 4  | 19 | 80  | 68 | 7  | 43 | 140 | 38 | 3  | 15 | 63  |
| Jiayuguan  | Gansu   | NEC | 85  | 22 | 31 | 421 | 82 | 11 | 38 | 212 | 87 | 21 | 15 | 535 |
| Jiuquan    | Gansu   | NEC | 126 | 39 | 45 | 662 | 96 | 8  | 49 | 180 | 82 | 15 | 27 | 458 |
| Lanzhou    | Gansu   | NEC | 90  | 10 | 36 | 237 | 81 | 6  | 45 | 117 | 80 | 6  | 24 | 163 |
| Linxia     | Gansu   | NEC | 46  | 3  | 20 | 82  | 44 | 2  | 34 | 57  | 40 | 2  | 26 | 57  |
| Pingliang  | Gansu   | NEC | 59  | 6  | 22 | 135 | 41 | 2  | 27 | 51  | 46 | 4  | 19 | 102 |
| Qingyang   | Gansu   | NEC | 54  | 10 | 14 | 186 | 40 | 2  | 27 | 54  | 36 | 3  | 12 | 63  |
| Tianshui   | Gansu   | NEC | 43  | 9  | 14 | 200 | 28 | 2  | 16 | 41  | 22 | 1  | 9  | 43  |
| Wuwei      | Gansu   | NEC | 80  | 13 | 39 | 284 | 74 | 7  | 34 | 129 | 51 | 4  | 15 | 115 |
| Zhangye    | Gansu   | NEC | 50  | 11 | 20 | 199 | 34 | 4  | 9  | 58  | 40 | 7  | 17 | 212 |
| Guyuan     | Ningxia | NEC | 75  | 11 | 27 | 232 | 55 | 3  | 28 | 71  | 54 | 6  | 14 | 157 |
| Shizuishan | Ningxia | NEC | 86  | 12 | 40 | 258 | 64 | 5  | 39 | 90  | 81 | 9  | 31 | 252 |
| Wuzhong    | Ningxia | NEC | 75  | 9  | 35 | 157 | 78 | 4  | 51 | 99  | 68 | 5  | 26 | 156 |
| Yinchuan   | Ningxia | NEC | 96  | 8  | 58 | 187 | 74 | 5  | 44 | 104 | 69 | 4  | 30 | 107 |
| Zhongwei   | Ningxia | NEC | 65  | 8  | 30 | 168 | 63 | 4  | 29 | 79  | 58 | 7  | 12 | 201 |

|           |          |     |     |     |    |      |     |    |    |     |     |    |    |     |
|-----------|----------|-----|-----|-----|----|------|-----|----|----|-----|-----|----|----|-----|
| Aksu      | Sinkiang | NEC | 255 | 46  | 46 | 804  | 118 | 18 | 48 | 231 | 118 | 17 | 31 | 466 |
| Hami      | Sinkiang | NEC | 79  | 8   | 39 | 197  | 114 | 16 | 72 | 317 | 81  | 7  | 34 | 176 |
| Hotan     | Sinkiang | NEC | 485 | 117 | 77 | 2562 | 296 | 42 | 67 | 628 | 176 | 25 | 52 | 627 |
| Kashgar   | Sinkiang | NEC | 295 | 63  | 97 | 1039 | 151 | 32 | 43 | 413 | 194 | 25 | 57 | 534 |
| Karamay   | Sinkiang | NEC | 53  | 5   | 21 | 139  | 58  | 8  | 31 | 147 | 43  | 4  | 23 | 134 |
| Kizilsu   | Sinkiang | NEC | 213 | 46  | 21 | 757  | 97  | 24 | 23 | 291 | 135 | 21 | 25 | 438 |
| Shihezi   | Sinkiang | NEC | 79  | 19  | 18 | 369  | 59  | 8  | 24 | 134 | 55  | 6  | 11 | 139 |
| Urumchi   | Sinkiang | NEC | 95  | 9   | 30 | 209  | 102 | 15 | 38 | 208 | 81  | 8  | 18 | 183 |
| Wujiaqu   | Sinkiang | NEC | 86  | 11  | 26 | 225  | 95  | 18 | 21 | 229 | 68  | 9  | 9  | 200 |
| Yili      | Sinkiang | NEC | 64  | 4   | 27 | 97   | 66  | 9  | 17 | 127 | 62  | 7  | 16 | 167 |
| Ezhou     | Hubei    | NEC | 61  | 5   | 16 | 98   | 79  | 5  | 36 | 110 | 78  | 3  | 32 | 106 |
| Huanggang | Hubei    | NEC | 48  | 4   | 18 | 87   | 63  | 3  | 29 | 83  | 64  | 3  | 32 | 98  |
| Jingmen   | Hubei    | NEC | 58  | 6   | 20 | 135  | 90  | 6  | 44 | 122 | 98  | 6  | 41 | 165 |
| Shiyan    | Hubei    | NEC | 48  | 4   | 21 | 85   | 63  | 5  | 38 | 92  | 77  | 6  | 25 | 148 |
| Wuhan     | Hubei    | NEC | 66  | 6   | 13 | 116  | 103 | 8  | 42 | 158 | 85  | 5  | 27 | 143 |
| Xianning  | Hubei    | NEC | 55  | 4   | 28 | 93   | 83  | 4  | 41 | 96  | 67  | 3  | 34 | 87  |
| Xiangyang | Hubei    | NEC | 59  | 5   | 26 | 112  | 80  | 5  | 51 | 115 | 91  | 6  | 32 | 142 |
| Xiaogan   | Hubei    | NEC | 55  | 4   | 30 | 84   | 79  | 5  | 45 | 108 | 81  | 4  | 47 | 138 |
| Yichang   | Hubei    | NEC | 58  | 6   | 21 | 117  | 85  | 5  | 55 | 131 | 77  | 5  | 24 | 131 |
| Anqing    | Anhui    | NEC | 58  | 4   | 25 | 80   | 53  | 4  | 24 | 77  | 49  | 2  | 21 | 70  |
| Bengbu    | Anhui    | NEC | 64  | 5   | 19 | 102  | 85  | 6  | 32 | 136 | 77  | 5  | 23 | 141 |
| Bozhou    | Anhui    | NEC | 60  | 4   | 37 | 98   | 85  | 6  | 48 | 114 | 92  | 5  | 29 | 164 |
| Chuzhou   | Anhui    | NEC | 69  | 6   | 20 | 112  | 81  | 7  | 34 | 125 | 77  | 5  | 50 | 145 |
| Fuyang    | Anhui    | NEC | 59  | 4   | 28 | 94   | 77  | 5  | 45 | 133 | 61  | 3  | 21 | 98  |
| Hefei     | Anhui    | NEC | 67  | 5   | 14 | 99   | 79  | 6  | 26 | 120 | 69  | 4  | 25 | 102 |
| Huaibei   | Anhui    | NEC | 66  | 7   | 27 | 129  | 63  | 4  | 42 | 84  | 85  | 7  | 23 | 168 |

|             |              |     |    |   |    |     |     |    |    |     |    |   |    |     |
|-------------|--------------|-----|----|---|----|-----|-----|----|----|-----|----|---|----|-----|
| Huainan     | Anhui        | NEC | 53 | 4 | 32 | 85  | 78  | 6  | 35 | 118 | 75 | 4 | 35 | 130 |
| Huangshan   | Anhui        | NEC | 30 | 2 | 14 | 43  | 46  | 5  | 19 | 83  | 40 | 2 | 21 | 62  |
| Lu'an       | Anhui        | NEC | 58 | 4 | 20 | 96  | 79  | 4  | 48 | 103 | 70 | 3 | 23 | 98  |
| Ma'anshan   | Anhui        | NEC | 60 | 4 | 20 | 84  | 79  | 7  | 34 | 120 | 64 | 3 | 38 | 115 |
| Suzhou      | Anhui        | NEC | 72 | 8 | 29 | 142 | 85  | 6  | 45 | 119 | 87 | 7 | 26 | 203 |
| Tongling    | Anhui        | NEC | 83 | 6 | 38 | 142 | 102 | 9  | 49 | 150 | 69 | 3 | 39 | 96  |
| Wuhu        | Anhui        | NEC | 54 | 3 | 26 | 78  | 74  | 5  | 35 | 107 | 68 | 4 | 40 | 107 |
| Changzhou   | Jiangsu      | NEC | 66 | 7 | 24 | 126 | 79  | 9  | 14 | 121 | 67 | 5 | 37 | 127 |
| Huaian      | Jiangsu      | NEC | 57 | 5 | 18 | 100 | 72  | 6  | 20 | 120 | 56 | 4 | 17 | 103 |
| Lianyungang | Jiangsu      | NEC | 55 | 5 | 23 | 92  | 69  | 7  | 24 | 139 | 56 | 5 | 17 | 121 |
| Nanjing     | Jiangsu      | NEC | 61 | 5 | 12 | 89  | 69  | 7  | 27 | 105 | 60 | 4 | 30 | 112 |
| Nantong     | Jiangsu      | NEC | 56 | 5 | 21 | 91  | 59  | 8  | 15 | 136 | 51 | 4 | 27 | 99  |
| Suzhou      | Jiangsu      | NEC | 60 | 5 | 26 | 92  | 76  | 8  | 23 | 125 | 57 | 4 | 23 | 107 |
| Suqian      | Jiangsu      | NEC | 56 | 5 | 24 | 94  | 67  | 4  | 28 | 104 | 64 | 6 | 17 | 165 |
| Taizhou     | Jiangsu      | NEC | 74 | 7 | 24 | 128 | 75  | 7  | 28 | 123 | 67 | 3 | 43 | 109 |
| Wuxi        | Jiangsu      | NEC | 61 | 5 | 27 | 96  | 79  | 8  | 25 | 130 | 63 | 4 | 30 | 114 |
| Xuzhou      | Jiangsu      | NEC | 62 | 5 | 25 | 109 | 78  | 4  | 53 | 104 | 77 | 6 | 27 | 155 |
| Yanchen     | Jiangsu      | NEC | 56 | 6 | 19 | 104 | 51  | 4  | 16 | 81  | 48 | 3 | 27 | 87  |
| Yangzhou    | Jiangsu      | NEC | 64 | 6 | 20 | 112 | 63  | 5  | 30 | 82  | 57 | 4 | 31 | 106 |
| Zhenjiang   | Jiangsu      | NEC | 50 | 5 | 12 | 92  | 57  | 6  | 14 | 86  | 50 | 4 | 24 | 112 |
| Shanghai    | Municipality | NEC | 52 | 4 | 27 | 92  | 72  | 10 | 17 | 149 | 43 | 3 | 23 | 84  |
| Hangzhou    | Zhejiang     | NEC | 53 | 5 | 24 | 96  | 64  | 7  | 20 | 107 | 61 | 4 | 18 | 106 |
| Huzhou      | Zhejiang     | NEC | 48 | 4 | 21 | 80  | 64  | 7  | 19 | 99  | 50 | 3 | 25 | 109 |
| Jiaxing     | Zhejiang     | NEC | 51 | 4 | 29 | 74  | 72  | 8  | 25 | 134 | 55 | 3 | 24 | 117 |
| Jinhua      | Zhejiang     | NEC | 49 | 3 | 18 | 78  | 69  | 8  | 18 | 118 | 61 | 4 | 22 | 114 |
| Lishui      | Zhejiang     | NEC | 39 | 3 | 12 | 59  | 47  | 3  | 26 | 66  | 49 | 4 | 12 | 97  |

|             |          |     |    |   |    |     |    |   |    |     |    |   |    |     |
|-------------|----------|-----|----|---|----|-----|----|---|----|-----|----|---|----|-----|
| Ningbo      | Zhejiang | NEC | 38 | 2 | 24 | 65  | 51 | 6 | 17 | 101 | 49 | 3 | 20 | 83  |
| Quzhou      | Zhejiang | NEC | 49 | 3 | 18 | 78  | 70 | 8 | 18 | 110 | 54 | 4 | 23 | 96  |
| Shaoxing    | Zhejiang | NEC | 48 | 4 | 23 | 89  | 76 | 9 | 24 | 138 | 63 | 4 | 18 | 100 |
| Taizhou     | Zhejiang | NEC | 41 | 2 | 31 | 57  | 45 | 5 | 20 | 81  | 48 | 2 | 30 | 85  |
| Wenjiang    | Zhejiang | NEC | 48 | 3 | 29 | 73  | 48 | 4 | 24 | 71  | 51 | 2 | 29 | 78  |
| Zhoushan    | Zhejiang | NEC | 28 | 1 | 22 | 44  | 34 | 5 | 11 | 72  | 31 | 2 | 17 | 65  |
| Fuzhou      | Jiangxi  | NEC | 46 | 4 | 26 | 79  | 67 | 6 | 30 | 106 | 61 | 4 | 21 | 99  |
| Ganzhou     | Jiangxi  | NEC | 60 | 5 | 33 | 102 | 61 | 5 | 32 | 99  | 61 | 3 | 33 | 93  |
| Ji'an       | Jiangxi  | NEC | 51 | 4 | 23 | 89  | 57 | 6 | 24 | 100 | 55 | 3 | 23 | 75  |
| Jingdezhen  | Jiangxi  | NEC | 53 | 5 | 20 | 85  | 71 | 6 | 31 | 99  | 51 | 3 | 19 | 81  |
| Jiujiang    | Jiangxi  | NEC | 53 | 4 | 17 | 81  | 74 | 6 | 38 | 103 | 55 | 3 | 13 | 80  |
| Nanchang    | Jiangxi  | NEC | 66 | 7 | 19 | 118 | 80 | 8 | 31 | 149 | 57 | 3 | 12 | 88  |
| Pingxiang   | Jiangxi  | NEC | 47 | 3 | 29 | 79  | 83 | 7 | 33 | 124 | 73 | 4 | 30 | 104 |
| Shangrao    | Jiangxi  | NEC | 54 | 4 | 23 | 77  | 62 | 6 | 30 | 108 | 55 | 3 | 30 | 95  |
| Xinyu       | Jiangxi  | NEC | 53 | 3 | 26 | 79  | 70 | 5 | 35 | 99  | 63 | 2 | 32 | 81  |
| Yichun      | Jiangxi  | NEC | 44 | 2 | 33 | 70  | 68 | 4 | 43 | 93  | 65 | 3 | 34 | 85  |
| Yingtian    | Jiangxi  | NEC | 39 | 4 | 13 | 64  | 61 | 5 | 35 | 88  | 57 | 3 | 21 | 85  |
| Changsha    | Hunan    | NEC | 47 | 3 | 15 | 72  | 85 | 6 | 31 | 124 | 72 | 5 | 25 | 124 |
| Changde     | Hunan    | NEC | 41 | 3 | 17 | 62  | 59 | 4 | 25 | 80  | 65 | 4 | 28 | 104 |
| Chenzhou    | Hunan    | NEC | 53 | 4 | 30 | 81  | 71 | 9 | 28 | 157 | 80 | 5 | 39 | 140 |
| Huaihua     | Hunan    | NEC | 49 | 3 | 33 | 71  | 91 | 6 | 36 | 125 | 84 | 6 | 30 | 149 |
| Loudi       | Hunan    | NEC | 52 | 3 | 28 | 88  | 87 | 6 | 41 | 117 | 73 | 5 | 26 | 139 |
| Xiangtan    | Hunan    | NEC | 48 | 3 | 25 | 76  | 90 | 6 | 37 | 123 | 79 | 5 | 32 | 150 |
| Yiyang      | Hunan    | NEC | 48 | 3 | 29 | 70  | 79 | 4 | 40 | 104 | 80 | 5 | 38 | 168 |
| Yongzhou    | Hunan    | NEC | 57 | 3 | 40 | 88  | 69 | 5 | 37 | 100 | 81 | 6 | 39 | 183 |
| Zhangjiajie | Hunan    | NEC | 44 | 3 | 18 | 80  | 71 | 5 | 35 | 102 | 71 | 5 | 15 | 109 |

|           |           |     |    |   |    |    |    |   |    |     |    |   |    |     |
|-----------|-----------|-----|----|---|----|----|----|---|----|-----|----|---|----|-----|
| Zhuzhou   | Hunan     | NEC | 42 | 3 | 23 | 70 | 81 | 7 | 38 | 134 | 69 | 4 | 28 | 104 |
| Dongguan  | Guangdong | NEC | 39 | 2 | 21 | 63 | 50 | 4 | 27 | 78  | 55 | 3 | 31 | 93  |
| Foshan    | Guangdong | NEC | 52 | 3 | 35 | 83 | 63 | 6 | 27 | 105 | 55 | 3 | 27 | 81  |
| Guangzhou | Guangdong | NEC | 55 | 2 | 34 | 75 | 57 | 5 | 31 | 93  | 65 | 3 | 37 | 100 |
| Heyuan    | Guangdong | NEC | 37 | 2 | 20 | 55 | 45 | 5 | 22 | 79  | 55 | 3 | 24 | 89  |
| Huizhou   | Guangdong | NEC | 44 | 3 | 24 | 72 | 45 | 5 | 19 | 76  | 43 | 4 | 20 | 82  |
| Jiangmen  | Guangdong | NEC | 33 | 3 | 16 | 58 | 52 | 7 | 18 | 94  | 49 | 3 | 27 | 80  |
| Maoming   | Guangdong | NEC | 34 | 4 | 13 | 81 | 46 | 8 | 9  | 94  | 43 | 4 | 20 | 83  |
| Meizhou   | Guangdong | NEC | 38 | 3 | 18 | 61 | 39 | 5 | 16 | 71  | 50 | 3 | 24 | 86  |
| Qingyuan  | Guangdong | NEC | 51 | 3 | 29 | 80 | 44 | 6 | 19 | 84  | 49 | 4 | 16 | 115 |
| Shantou   | Guangdong | NEC | 42 | 3 | 20 | 66 | 42 | 5 | 25 | 74  | 48 | 2 | 30 | 77  |
| Shaoguan  | Guangdong | NEC | 47 | 3 | 29 | 82 | 46 | 6 | 20 | 79  | 59 | 4 | 17 | 108 |
| Shenzhen  | Guangdong | NEC | 37 | 4 | 20 | 78 | 44 | 6 | 20 | 77  | 47 | 3 | 28 | 79  |
| Zhujiang  | Guangdong | NEC | 33 | 3 | 13 | 64 | 50 | 8 | 16 | 99  | 40 | 3 | 21 | 85  |
| Zhaoqing  | Guangdong | NEC | 47 | 3 | 27 | 77 | 54 | 6 | 27 | 104 | 55 | 4 | 17 | 96  |
| Zhongshan | Guangdong | NEC | 31 | 4 | 15 | 76 | 39 | 6 | 11 | 80  | 43 | 3 | 21 | 81  |
| Zhuhai    | Guangdong | NEC | 38 | 5 | 21 | 95 | 47 | 8 | 17 | 101 | 53 | 4 | 21 | 108 |
| Fuzhou    | Fujian    | NEC | 44 | 4 | 11 | 86 | 38 | 3 | 19 | 55  | 42 | 2 | 17 | 65  |
| Longyan   | Fujian    | NEC | 33 | 3 | 10 | 65 | 34 | 4 | 17 | 58  | 46 | 3 | 19 | 78  |
| Nanping   | Fujian    | NEC | 25 | 2 | 7  | 48 | 26 | 3 | 13 | 51  | 31 | 2 | 16 | 51  |
| Ningde    | Fujian    | NEC | 35 | 3 | 10 | 59 | 31 | 2 | 20 | 43  | 34 | 2 | 14 | 51  |
| Putian    | Fujian    | NEC | 38 | 3 | 18 | 58 | 31 | 2 | 19 | 41  | 40 | 2 | 21 | 56  |
| Quanzhou  | Fujian    | NEC | 45 | 5 | 10 | 98 | 30 | 4 | 18 | 59  | 46 | 3 | 22 | 92  |
| Sanming   | Fujian    | NEC | 44 | 4 | 11 | 74 | 41 | 5 | 18 | 78  | 48 | 4 | 11 | 81  |
| Xiamen    | Fujian    | NEC | 37 | 3 | 21 | 65 | 32 | 2 | 21 | 51  | 45 | 2 | 20 | 62  |
| Zhangzhou | Fujian    | NEC | 43 | 3 | 24 | 80 | 42 | 2 | 33 | 59  | 52 | 2 | 24 | 84  |

|           |              |     |    |   |    |     |    |   |    |     |    |   |    |     |
|-----------|--------------|-----|----|---|----|-----|----|---|----|-----|----|---|----|-----|
| Haikou    | Hainan       | NEC | 28 | 2 | 19 | 46  | 34 | 4 | 20 | 68  | 30 | 2 | 12 | 65  |
| Sanya     | Hainan       | NEC | 21 | 1 | 16 | 30  | 24 | 2 | 15 | 33  | 23 | 1 | 10 | 35  |
| Chongqing | Municipality | NEC | 58 | 5 | 21 | 104 | 82 | 5 | 42 | 106 | 49 | 4 | 19 | 86  |
| Bazhong   | Sichuan      | NEC | 27 | 2 | 11 | 41  | 35 | 2 | 25 | 46  | 30 | 2 | 12 | 54  |
| Chengdu   | Sichuan      | NEC | 62 | 7 | 15 | 134 | 88 | 8 | 42 | 139 | 53 | 5 | 16 | 158 |
| Dazhou    | Sichuan      | NEC | 49 | 3 | 12 | 73  | 86 | 5 | 53 | 121 | 62 | 4 | 26 | 96  |
| Deyang    | Sichuan      | NEC | 56 | 4 | 22 | 87  | 89 | 9 | 43 | 169 | 49 | 4 | 19 | 96  |
| Guangyuan | Sichuan      | NEC | 35 | 4 | 16 | 101 | 38 | 2 | 29 | 50  | 31 | 2 | 15 | 50  |
| Leshan    | Sichuan      | NEC | 44 | 6 | 14 | 126 | 78 | 9 | 27 | 150 | 47 | 4 | 23 | 126 |
| Luzhou    | Sichuan      | NEC | 49 | 7 | 14 | 113 | 80 | 9 | 32 | 145 | 43 | 3 | 14 | 71  |
| Meishan   | Sichuan      | NEC | 54 | 5 | 14 | 84  | 79 | 8 | 38 | 136 | 45 | 5 | 15 | 159 |
| Mianyang  | Sichuan      | NEC | 40 | 3 | 12 | 62  | 63 | 5 | 26 | 98  | 35 | 3 | 7  | 83  |
| Nanchong  | Sichuan      | NEC | 54 | 5 | 20 | 93  | 71 | 4 | 41 | 97  | 51 | 4 | 25 | 113 |
| Panzhihua | Sichuan      | NEC | 44 | 3 | 22 | 69  | 53 | 4 | 34 | 81  | 53 | 2 | 22 | 71  |
| Suining   | Sichuan      | NEC | 53 | 5 | 21 | 92  | 72 | 4 | 39 | 105 | 50 | 4 | 25 | 110 |
| Ya'an     | Sichuan      | NEC | 30 | 3 | 12 | 57  | 35 | 2 | 24 | 58  | 29 | 2 | 14 | 69  |
| Ziyang    | Sichuan      | NEC | 41 | 3 | 24 | 62  | 60 | 5 | 38 | 91  | 37 | 2 | 23 | 87  |
| Zigong    | Sichuan      | NEC | 59 | 6 | 30 | 115 | 85 | 8 | 44 | 128 | 60 | 4 | 33 | 120 |
| Baoshan   | Yunnan       | NEC | 37 | 2 | 27 | 51  | 37 | 1 | 29 | 46  | 32 | 2 | 7  | 50  |
| Chuxiong  | Yunnan       | NEC | 26 | 2 | 14 | 41  | 41 | 6 | 11 | 75  | 23 | 2 | 11 | 38  |
| Dali      | Yunnan       | NEC | 15 | 1 | 4  | 27  | 18 | 2 | 8  | 37  | 17 | 1 | 10 | 25  |
| Dehong    | Yunnan       | NEC | 34 | 2 | 19 | 51  | 30 | 2 | 23 | 46  | 37 | 2 | 20 | 55  |
| Honghe    | Yunnan       | NEC | 38 | 5 | 17 | 108 | 59 | 7 | 26 | 99  | 32 | 2 | 16 | 59  |
| Kunming   | Yunnan       | NEC | 34 | 3 | 17 | 65  | 48 | 5 | 22 | 76  | 41 | 2 | 23 | 64  |
| Lijiang   | Yunnan       | NEC | 30 | 1 | 24 | 37  | 33 | 1 | 29 | 43  | 35 | 1 | 28 | 41  |
| Lincang   | Yunnan       | NEC | 27 | 1 | 19 | 40  | 27 | 1 | 22 | 38  | 28 | 1 | 23 | 60  |

|               |         |     |    |   |    |     |    |    |    |     |    |   |    |     |
|---------------|---------|-----|----|---|----|-----|----|----|----|-----|----|---|----|-----|
| Nujiang       | Yunnan  | NEC | 24 | 1 | 16 | 35  | 27 | 1  | 21 | 38  | 26 | 1 | 20 | 34  |
| Qujing        | Yunnan  | NEC | 30 | 2 | 14 | 49  | 44 | 4  | 21 | 67  | 33 | 2 | 15 | 47  |
| Wenshan       | Yunnan  | NEC | 26 | 3 | 7  | 68  | 45 | 3  | 24 | 64  | 26 | 2 | 12 | 40  |
| Xishuangbanna | Yunnan  | NEC | 22 | 1 | 10 | 31  | 29 | 2  | 15 | 40  | 40 | 2 | 20 | 57  |
| Tuxi          | Yunnan  | NEC | 25 | 2 | 9  | 40  | 45 | 4  | 16 | 69  | 30 | 2 | 14 | 57  |
| Zhaotong      | Yunnan  | NEC | 47 | 4 | 23 | 88  | 59 | 6  | 21 | 92  | 33 | 2 | 16 | 57  |
| Anshun        | Guizhou | NEC | 36 | 3 | 24 | 63  | 69 | 8  | 28 | 124 | 38 | 3 | 24 | 76  |
| Bijie         | Guizhou | NEC | 28 | 3 | 8  | 47  | 43 | 4  | 6  | 74  | 24 | 2 | 9  | 52  |
| Guiyang       | Guizhou | NEC | 34 | 4 | 16 | 79  | 63 | 6  | 13 | 97  | 39 | 3 | 17 | 78  |
| Liupanshui    | Guizhou | NEC | 51 | 5 | 24 | 94  | 74 | 7  | 25 | 120 | 39 | 2 | 15 | 59  |
| Tongren       | Guizhou | NEC | 27 | 1 | 25 | 35  | 41 | 2  | 28 | 54  | 40 | 3 | 23 | 75  |
| Zunyi         | Guizhou | NEC | 50 | 3 | 28 | 74  | 74 | 6  | 35 | 113 | 55 | 4 | 29 | 99  |
| Baise         | Guangxi | NEC | 46 | 4 | 17 | 85  | 51 | 5  | 12 | 83  | 53 | 3 | 29 | 90  |
| Beihai        | Guangxi | NEC | 34 | 3 | 16 | 63  | 41 | 8  | 12 | 87  | 36 | 3 | 18 | 79  |
| Chongzuo      | Guangxi | NEC | 42 | 4 | 11 | 73  | 53 | 7  | 13 | 96  | 47 | 4 | 23 | 88  |
| Fangchenggang | Guangxi | NEC | 34 | 3 | 15 | 63  | 44 | 8  | 12 | 100 | 40 | 3 | 22 | 81  |
| Guigang       | Guangxi | NEC | 61 | 4 | 32 | 105 | 60 | 10 | 19 | 122 | 48 | 3 | 17 | 85  |
| Guilin        | Guangxi | NEC | 43 | 3 | 26 | 63  | 58 | 6  | 17 | 86  | 68 | 4 | 33 | 112 |
| Hechi         | Guangxi | NEC | 47 | 4 | 30 | 79  | 61 | 6  | 16 | 98  | 55 | 5 | 17 | 139 |
| Hezhou        | Guangxi | NEC | 50 | 3 | 30 | 73  | 51 | 7  | 17 | 85  | 46 | 4 | 7  | 79  |
| Laibin        | Guangxi | NEC | 59 | 4 | 29 | 99  | 67 | 9  | 23 | 116 | 58 | 4 | 16 | 102 |
| Liuzhou       | Guangxi | NEC | 56 | 4 | 31 | 110 | 70 | 9  | 24 | 112 | 66 | 5 | 28 | 116 |
| Nanning       | Guangxi | NEC | 58 | 8 | 19 | 135 | 69 | 12 | 13 | 151 | 53 | 5 | 18 | 125 |
| Qinzhou       | Guangxi | NEC | 44 | 4 | 20 | 78  | 49 | 9  | 13 | 111 | 44 | 4 | 24 | 91  |
| Wuzhou        | Guangxi | NEC | 55 | 4 | 31 | 90  | 49 | 7  | 19 | 83  | 51 | 3 | 20 | 78  |
| Yulin         | Guangxi | NEC | 45 | 4 | 23 | 78  | 45 | 7  | 17 | 91  | 41 | 3 | 12 | 78  |



|          |         |     |    |    |    |     |     |    |    |     |     |   |    |     |
|----------|---------|-----|----|----|----|-----|-----|----|----|-----|-----|---|----|-----|
| Golog    | Qinghai | NEC | 77 | 7  | 34 | 133 | 86  | 8  | 53 | 122 | 53  | 5 | 16 | 120 |
| Haidong  | Qinghai | NEC | 37 | 4  | 0  | 75  | 49  | 7  | 20 | 126 | 33  | 2 | 8  | 50  |
| Xining   | Qinghai | NEC | 84 | 14 | 36 | 326 | 72  | 4  | 40 | 97  | 67  | 5 | 22 | 114 |
| Ali      | Tibet   | NEC | 25 | 4  | 4  | 60  | 18  | 3  | 8  | 37  | 16  | 1 | 1  | 32  |
| Qamdo    | Tibet   | NEC | 37 | 4  | 12 | 98  | 38  | 4  | 18 | 81  | 37  | 3 | 0  | 67  |
| Lhasa    | Tibet   | NEC | 44 | 4  | 24 | 99  | 44  | 3  | 25 | 72  | 46  | 3 | 27 | 77  |
| Nyingchi | Tibet   | NEC | 15 | 1  | 6  | 30  | 12  | 1  | 7  | 22  | 14  | 1 | 8  | 25  |
| Naqu     | Tibet   | NEC | 84 | 11 | 19 | 166 | 110 | 16 | 48 | 241 | 105 | 5 | 68 | 159 |
| Shigatse | Tibet   | NEC | 24 | 2  | 11 | 53  | 23  | 2  | 13 | 41  | 21  | 1 | 8  | 46  |
| Lhoka    | Tibet   | NEC | 29 | 3  | 7  | 53  | 22  | 2  | 9  | 43  | 26  | 2 | 12 | 52  |

132 <sup>a</sup> EC and NEC denote emission control and non-emission control regions, respectively, of which the latter means regions without implementation  
133 of emission control measures.

134 <sup>b</sup> The pre-Parade Blue, Parade Blue, and post-Parade Blue periods indicate the periods of 1-19 August, 20 August-3 September, and 4-30  
135 September 2015, respectively.

136

137

138

139

140

141

142

143

144 **Table S4.** Summary of daily average NO<sub>2</sub> concentrations (µg m<sup>-3</sup>) during the pre-Parade Blue, Parade Blue and post-Parade Blue periods in the  
 145 291 cities across China

| City         | Province     | Region <sup>a</sup> | Pre-Parade Blue period <sup>b</sup> |    |     |     | Parade Blue period <sup>b</sup> |    |     |     | Post-Parade Blue period <sup>b</sup> |    |     |     |
|--------------|--------------|---------------------|-------------------------------------|----|-----|-----|---------------------------------|----|-----|-----|--------------------------------------|----|-----|-----|
|              |              |                     | Mean                                | SE | Min | Max | Mean                            | SE | Min | Max | Mean                                 | SE | Min | Max |
| Beijing      | Municipality | EC                  | 34                                  | 1  | 26  | 44  | 21                              | 1  | 17  | 24  | 42                                   | 2  | 20  | 63  |
| Tianjing     | Municipality | EC                  | 26                                  | 2  | 14  | 45  | 21                              | 2  | 12  | 33  | 25                                   | 2  | 11  | 41  |
| Baoding      | Hebei        | EC                  | 34                                  | 2  | 23  | 51  | 25                              | 2  | 15  | 40  | 44                                   | 3  | 16  | 73  |
| Cangzhou     | Hebei        | EC                  | 34                                  | 1  | 26  | 44  | 21                              | 1  | 17  | 24  | 41                                   | 3  | 21  | 87  |
| Chengde      | Hebei        | EC                  | 27                                  | 1  | 21  | 35  | 21                              | 1  | 14  | 26  | 28                                   | 1  | 16  | 41  |
| Handan       | Hebei        | EC                  | 38                                  | 3  | 22  | 70  | 36                              | 3  | 20  | 54  | 45                                   | 3  | 15  | 76  |
| Hengshui     | Hebei        | EC                  | 29                                  | 2  | 18  | 59  | 27                              | 1  | 18  | 33  | 44                                   | 3  | 20  | 77  |
| Langfang     | Hebei        | EC                  | 42                                  | 1  | 30  | 55  | 36                              | 2  | 21  | 55  | 54                                   | 3  | 26  | 89  |
| Qinhuangdao  | Hebei        | EC                  | 41                                  | 2  | 17  | 53  | 35                              | 3  | 18  | 52  | 35                                   | 2  | 19  | 58  |
| Shijiazhuang | Hebei        | EC                  | 29                                  | 2  | 15  | 56  | 22                              | 3  | 7   | 37  | 48                                   | 4  | 9   | 79  |
| Tangshan     | Hebei        | EC                  | 44                                  | 2  | 32  | 76  | 45                              | 4  | 10  | 74  | 58                                   | 3  | 23  | 96  |
| Xingtai      | Hebei        | EC                  | 50                                  | 2  | 34  | 63  | 38                              | 4  | 14  | 74  | 54                                   | 3  | 22  | 81  |
| Zhangjiakou  | Hebei        | EC                  | 17                                  | 1  | 11  | 24  | 24                              | 2  | 14  | 32  | 25                                   | 1  | 16  | 34  |
| Changzhi     | Shanxi       | EC                  | 25                                  | 2  | 10  | 41  | 31                              | 1  | 22  | 41  | 27                                   | 2  | 12  | 55  |
| Datong       | Shanxi       | EC                  | 19                                  | 1  | 9   | 30  | 16                              | 1  | 11  | 23  | 23                                   | 2  | 8   | 41  |
| Jincheng     | Shanxi       | EC                  | 29                                  | 2  | 10  | 46  | 29                              | 2  | 15  | 38  | 30                                   | 2  | 11  | 43  |
| Jinzhong     | Shanxi       | EC                  | 22                                  | 1  | 15  | 31  | 20                              | 1  | 12  | 29  | 24                                   | 1  | 11  | 36  |
| Linfen       | Shanxi       | EC                  | 20                                  | 1  | 14  | 25  | 19                              | 1  | 12  | 32  | 23                                   | 1  | 12  | 35  |
| Lvliang      | Shanxi       | EC                  | 22                                  | 1  | 14  | 34  | 18                              | 1  | 13  | 23  | 30                                   | 2  | 16  | 56  |
| Shuozhou     | Shanxi       | EC                  | 31                                  | 2  | 13  | 45  | 31                              | 1  | 20  | 39  | 31                                   | 2  | 15  | 65  |
| Taiyuan      | Shanxi       | EC                  | 30                                  | 1  | 22  | 41  | 28                              | 2  | 20  | 41  | 34                                   | 2  | 17  | 51  |

|             |                |    |    |   |    |    |    |   |    |    |    |   |    |    |
|-------------|----------------|----|----|---|----|----|----|---|----|----|----|---|----|----|
| Xinzhou     | Shanxi         | EC | 33 | 2 | 16 | 48 | 29 | 2 | 16 | 37 | 34 | 2 | 14 | 51 |
| Yangquan    | Shanxi         | EC | 24 | 1 | 12 | 32 | 23 | 2 | 11 | 32 | 31 | 1 | 17 | 45 |
| Yuncheng    | Shanxi         | EC | 13 | 2 | 4  | 30 | 20 | 2 | 10 | 33 | 21 | 2 | 8  | 46 |
| Binzhou     | Shandong       | EC | 27 | 2 | 16 | 49 | 28 | 3 | 15 | 55 | 35 | 2 | 14 | 59 |
| Dezhou      | Shandong       | EC | 29 | 2 | 19 | 46 | 30 | 2 | 16 | 42 | 40 | 3 | 17 | 66 |
| Dongying    | Shandong       | EC | 27 | 2 | 9  | 43 | 22 | 3 | 8  | 40 | 34 | 3 | 7  | 65 |
| Jinan       | Shandong       | EC | 35 | 2 | 20 | 49 | 41 | 2 | 26 | 54 | 54 | 3 | 34 | 85 |
| Jining      | Shandong       | EC | 31 | 2 | 13 | 50 | 37 | 3 | 24 | 67 | 43 | 2 | 25 | 83 |
| Laiwu       | Shandong       | EC | 29 | 2 | 12 | 47 | 38 | 2 | 23 | 54 | 46 | 2 | 24 | 68 |
| Liaocheng   | Shandong       | EC | 29 | 2 | 18 | 43 | 27 | 3 | 10 | 44 | 40 | 2 | 20 | 69 |
| Linyi       | Shandong       | EC | 33 | 2 | 16 | 54 | 39 | 3 | 27 | 62 | 41 | 3 | 18 | 80 |
| Qingdao     | Shandong       | EC | 19 | 1 | 11 | 35 | 28 | 1 | 16 | 36 | 29 | 2 | 12 | 50 |
| Rizhao      | Shandong       | EC | 20 | 2 | 5  | 39 | 28 | 3 | 16 | 44 | 33 | 3 | 7  | 65 |
| Tai'an      | Shandong       | EC | 30 | 2 | 17 | 47 | 38 | 2 | 22 | 50 | 38 | 2 | 22 | 62 |
| Weihai      | Shandong       | EC | 15 | 1 | 6  | 28 | 14 | 1 | 7  | 22 | 18 | 1 | 5  | 33 |
| Weifang     | Shandong       | EC | 25 | 2 | 14 | 41 | 33 | 2 | 22 | 48 | 33 | 2 | 14 | 68 |
| Yantai      | Shandong       | EC | 23 | 1 | 12 | 33 | 27 | 2 | 17 | 42 | 31 | 2 | 12 | 48 |
| Zaozhuang   | Shandong       | EC | 26 | 2 | 15 | 42 | 29 | 1 | 19 | 38 | 31 | 2 | 14 | 62 |
| Zibo        | Shandong       | EC | 52 | 2 | 31 | 68 | 55 | 3 | 38 | 70 | 60 | 3 | 38 | 97 |
| Alxa League | Inner Mongolia | EC | 7  | 0 | 5  | 10 | 8  | 1 | 4  | 11 | 17 | 1 | 9  | 27 |
| Bayannur    | Inner Mongolia | EC | 19 | 1 | 14 | 24 | 22 | 2 | 13 | 39 | 21 | 1 | 13 | 34 |
| Baotou      | Inner Mongolia | EC | 34 | 2 | 20 | 49 | 33 | 2 | 18 | 43 | 37 | 2 | 14 | 63 |
| Chifeng     | Inner Mongolia | EC | 16 | 1 | 10 | 27 | 17 | 0 | 14 | 20 | 17 | 1 | 10 | 24 |
| Ordos       | Inner Mongolia | EC | 19 | 1 | 9  | 30 | 18 | 1 | 12 | 26 | 18 | 1 | 9  | 36 |
| Hohhot      | Inner Mongolia | EC | 32 | 1 | 21 | 43 | 32 | 2 | 18 | 42 | 34 | 3 | 13 | 62 |
| Hulun Buir  | Inner Mongolia | EC | 20 | 2 | 7  | 37 | 19 | 1 | 11 | 27 | 17 | 1 | 7  | 29 |

|                |                |     |    |   |    |     |    |   |    |    |    |   |    |    |
|----------------|----------------|-----|----|---|----|-----|----|---|----|----|----|---|----|----|
| Tongliao       | Inner Mongolia | EC  | 16 | 1 | 10 | 25  | 13 | 1 | 8  | 20 | 20 | 1 | 7  | 29 |
| Wuhai          | Inner Mongolia | EC  | 17 | 1 | 11 | 24  | 17 | 1 | 11 | 24 | 25 | 2 | 9  | 54 |
| Hinggan League | Inner Mongolia | EC  | 14 | 1 | 6  | 22  | 10 | 1 | 7  | 16 | 14 | 1 | 9  | 24 |
| Anyang         | Henan          | EC  | 30 | 2 | 18 | 47  | 32 | 2 | 20 | 42 | 46 | 2 | 19 | 77 |
| Hebi           | Henan          | EC  | 27 | 3 | 9  | 48  | 24 | 2 | 16 | 39 | 48 | 3 | 16 | 72 |
| Jiaozuo        | Henan          | EC  | 29 | 2 | 21 | 47  | 30 | 2 | 17 | 40 | 36 | 2 | 16 | 55 |
| Kaifeng        | Henan          | EC  | 25 | 2 | 15 | 49  | 24 | 2 | 14 | 36 | 36 | 2 | 19 | 59 |
| Luoyang        | Henan          | EC  | 23 | 1 | 15 | 41  | 25 | 2 | 13 | 33 | 35 | 2 | 16 | 54 |
| Luohe          | Henan          | EC  | 18 | 2 | 9  | 33  | 23 | 2 | 12 | 35 | 31 | 2 | 13 | 48 |
| Nanyang        | Henan          | EC  | 16 | 1 | 8  | 25  | 21 | 1 | 14 | 28 | 22 | 2 | 8  | 41 |
| Pingdingshan   | Henan          | EC  | 27 | 2 | 14 | 41  | 33 | 2 | 23 | 43 | 38 | 2 | 22 | 56 |
| Sanmenxia      | Henan          | EC  | 23 | 2 | 15 | 43  | 23 | 3 | 14 | 49 | 28 | 1 | 16 | 42 |
| Shangqiu       | Henan          | EC  | 16 | 1 | 8  | 31  | 21 | 2 | 11 | 39 | 28 | 2 | 14 | 65 |
| Xinyang        | Henan          | EC  | 19 | 1 | 12 | 30  | 28 | 1 | 22 | 32 | 29 | 1 | 15 | 42 |
| Zhengzhou      | Henan          | EC  | 39 | 3 | 23 | 73  | 45 | 3 | 24 | 69 | 56 | 3 | 26 | 86 |
| Zhoukou        | Henan          | EC  | 11 | 1 | 7  | 17  | 13 | 1 | 8  | 19 | 18 | 1 | 9  | 36 |
| Zhumadian      | Henan          | EC  | 22 | 2 | 8  | 34  | 24 | 1 | 16 | 32 | 25 | 1 | 13 | 46 |
| Anshan         | Liaoning       | NEC | 18 | 2 | 11 | 33  | 27 | 1 | 16 | 31 | 31 | 2 | 11 | 54 |
| Benxi          | Liaoning       | NEC | 19 | 1 | 11 | 30  | 25 | 1 | 14 | 34 | 36 | 2 | 17 | 60 |
| Chaoyang       | Liaoning       | NEC | 12 | 1 | 7  | 16  | 13 | 1 | 8  | 17 | 14 | 1 | 8  | 24 |
| Dalian         | Liaoning       | NEC | 20 | 1 | 14 | 25  | 23 | 1 | 17 | 31 | 30 | 1 | 15 | 40 |
| Dandong        | Liaoning       | NEC | 29 | 8 | 1  | 108 | 15 | 1 | 7  | 20 | 20 | 1 | 12 | 42 |
| Fushun         | Liaoning       | NEC | 15 | 1 | 10 | 22  | 18 | 1 | 8  | 24 | 30 | 2 | 12 | 50 |
| Fuxin          | Liaoning       | NEC | 28 | 1 | 18 | 38  | 25 | 1 | 15 | 35 | 31 | 1 | 15 | 42 |
| Huludao        | Liaoning       | NEC | 23 | 2 | 11 | 44  | 28 | 2 | 15 | 41 | 33 | 2 | 14 | 49 |
| Jinzhou        | Liaoning       | NEC | 26 | 1 | 18 | 36  | 28 | 1 | 21 | 36 | 34 | 1 | 20 | 44 |

|              |              |     |    |   |    |    |    |   |    |    |    |   |    |    |
|--------------|--------------|-----|----|---|----|----|----|---|----|----|----|---|----|----|
| Liaoyang     | Liaoning     | NEC | 15 | 1 | 6  | 31 | 26 | 1 | 15 | 32 | 30 | 2 | 6  | 57 |
| Panjin       | Liaoning     | NEC | 13 | 2 | 4  | 32 | 24 | 1 | 17 | 32 | 27 | 2 | 13 | 51 |
| Shenyang     | Liaoning     | NEC | 31 | 2 | 20 | 49 | 35 | 2 | 27 | 48 | 44 | 2 | 25 | 63 |
| Tieling      | Liaoning     | NEC | 20 | 1 | 13 | 26 | 23 | 1 | 14 | 29 | 29 | 1 | 16 | 41 |
| Wafangdian   | Liaoning     | NEC | 17 | 1 | 11 | 24 | 21 | 1 | 15 | 33 | 31 | 1 | 18 | 46 |
| Yingkou      | Liaoning     | NEC | 16 | 1 | 8  | 27 | 22 | 1 | 15 | 33 | 30 | 2 | 16 | 61 |
| Baicheng     | Jilin        | NEC | 12 | 1 | 8  | 21 | 9  | 1 | 4  | 13 | 11 | 1 | 7  | 19 |
| Baishan      | Jilin        | NEC | 14 | 0 | 9  | 18 | 16 | 1 | 12 | 19 | 21 | 1 | 13 | 36 |
| Changchun    | Jilin        | NEC | 28 | 2 | 17 | 44 | 33 | 2 | 22 | 45 | 42 | 2 | 22 | 62 |
| Jilin        | Jilin        | NEC | 20 | 1 | 13 | 28 | 24 | 1 | 16 | 31 | 31 | 1 | 25 | 43 |
| Liaoyuan     | Jilin        | NEC | 15 | 2 | 3  | 30 | 15 | 1 | 8  | 24 | 26 | 1 | 11 | 37 |
| Siping       | Jilin        | NEC | 17 | 2 | 4  | 33 | 23 | 3 | 13 | 62 | 32 | 2 | 12 | 51 |
| Songyuan     | Jilin        | NEC | 16 | 1 | 9  | 24 | 14 | 1 | 6  | 22 | 26 | 2 | 10 | 42 |
| Daqing       | Heilongjiang | NEC | 16 | 1 | 12 | 23 | 16 | 1 | 11 | 24 | 21 | 1 | 10 | 35 |
| Daxinganling | Heilongjiang | NEC | 11 | 1 | 8  | 15 | 15 | 1 | 10 | 20 | 11 | 1 | 6  | 18 |
| Harbin       | Heilongjiang | NEC | 31 | 2 | 21 | 51 | 31 | 2 | 20 | 42 | 37 | 2 | 18 | 60 |
| Hegang       | Heilongjiang | NEC | 6  | 1 | 3  | 10 | 4  | 0 | 2  | 6  | 9  | 1 | 4  | 17 |
| Heihe        | Heilongjiang | NEC | 11 | 1 | 5  | 15 | 9  | 1 | 7  | 14 | 12 | 1 | 6  | 29 |
| Jixi         | Heilongjiang | NEC | 16 | 1 | 11 | 21 | 13 | 1 | 8  | 19 | 18 | 1 | 9  | 34 |
| Jiamusi      | Heilongjiang | NEC | 18 | 1 | 8  | 27 | 15 | 2 | 8  | 31 | 22 | 2 | 5  | 50 |
| Mudanjiang   | Heilongjiang | NEC | 24 | 1 | 16 | 33 | 19 | 1 | 12 | 25 | 20 | 1 | 13 | 33 |
| Qitaihe      | Heilongjiang | NEC | 12 | 0 | 10 | 16 | 11 | 1 | 7  | 15 | 13 | 1 | 5  | 19 |
| Qiqihar      | Heilongjiang | NEC | 15 | 1 | 8  | 19 | 11 | 1 | 7  | 16 | 18 | 1 | 10 | 28 |
| Shuangyashan | Heilongjiang | NEC | 15 | 0 | 12 | 19 | 15 | 1 | 9  | 18 | 18 | 1 | 13 | 28 |
| Suihua       | Heilongjiang | NEC | 20 | 2 | 10 | 41 | 15 | 1 | 10 | 24 | 15 | 1 | 7  | 30 |
| Ankang       | Shaanxi      | NEC | 6  | 1 | 3  | 11 | 7  | 1 | 3  | 11 | 10 | 1 | 5  | 18 |

|            |         |     |    |   |    |    |    |   |    |    |    |   |    |    |
|------------|---------|-----|----|---|----|----|----|---|----|----|----|---|----|----|
| Baoji      | Shaanxi | NEC | 23 | 1 | 16 | 34 | 28 | 1 | 16 | 33 | 28 | 1 | 17 | 39 |
| Hanzhong   | Shaanxi | NEC | 15 | 1 | 9  | 22 | 22 | 1 | 13 | 27 | 23 | 1 | 10 | 31 |
| Shangluo   | Shaanxi | NEC | 15 | 1 | 10 | 22 | 19 | 1 | 13 | 24 | 21 | 1 | 15 | 28 |
| Tongchuan  | Shaanxi | NEC | 24 | 2 | 15 | 47 | 26 | 1 | 17 | 32 | 27 | 1 | 15 | 41 |
| Weinan     | Shaanxi | NEC | 29 | 1 | 22 | 43 | 39 | 2 | 29 | 54 | 37 | 2 | 22 | 56 |
| Xi'an      | Shaanxi | NEC | 36 | 2 | 24 | 55 | 44 | 2 | 29 | 57 | 38 | 2 | 21 | 56 |
| Xianyang   | Shaanxi | NEC | 23 | 1 | 13 | 36 | 27 | 1 | 19 | 34 | 30 | 2 | 16 | 49 |
| Yan'an     | Shaanxi | NEC | 35 | 1 | 23 | 40 | 40 | 1 | 33 | 53 | 35 | 1 | 27 | 44 |
| Yulin      | Shaanxi | NEC | 27 | 2 | 12 | 43 | 33 | 3 | 14 | 56 | 26 | 2 | 15 | 48 |
| Baiying    | Gansu   | NEC | 25 | 2 | 12 | 40 | 28 | 3 | 4  | 42 | 22 | 2 | 6  | 50 |
| Dingxi     | Gansu   | NEC | 20 | 2 | 9  | 40 | 20 | 1 | 12 | 30 | 18 | 1 | 10 | 35 |
| Gannan     | Gansu   | NEC | 17 | 2 | 8  | 40 | 14 | 1 | 10 | 19 | 15 | 1 | 10 | 28 |
| Jiayuguan  | Gansu   | NEC | 25 | 1 | 13 | 37 | 19 | 1 | 13 | 29 | 28 | 1 | 15 | 42 |
| Jiuquan    | Gansu   | NEC | 23 | 2 | 8  | 37 | 25 | 2 | 12 | 38 | 26 | 1 | 14 | 42 |
| Lanzhou    | Gansu   | NEC | 38 | 2 | 20 | 53 | 42 | 3 | 25 | 59 | 42 | 2 | 23 | 72 |
| Linxia     | Gansu   | NEC | 26 | 2 | 12 | 49 | 31 | 2 | 20 | 49 | 25 | 2 | 7  | 40 |
| Pingliang  | Gansu   | NEC | 41 | 1 | 28 | 50 | 50 | 2 | 38 | 62 | 43 | 1 | 29 | 55 |
| Qingyang   | Gansu   | NEC | 10 | 1 | 5  | 16 | 14 | 1 | 9  | 20 | 14 | 1 | 7  | 21 |
| Tianshui   | Gansu   | NEC | 16 | 1 | 10 | 22 | 14 | 1 | 6  | 19 | 20 | 1 | 14 | 27 |
| Wuwei      | Gansu   | NEC | 22 | 1 | 13 | 36 | 23 | 2 | 14 | 35 | 21 | 2 | 11 | 46 |
| Zhangye    | Gansu   | NEC | 18 | 1 | 10 | 26 | 15 | 1 | 8  | 21 | 20 | 1 | 11 | 36 |
| Guyuan     | Ningxia | NEC | 18 | 2 | 9  | 30 | 22 | 2 | 11 | 31 | 17 | 1 | 9  | 28 |
| Shizuishan | Ningxia | NEC | 17 | 1 | 12 | 33 | 20 | 1 | 13 | 30 | 23 | 1 | 11 | 44 |
| Wuzhong    | Ningxia | NEC | 17 | 1 | 9  | 29 | 18 | 2 | 5  | 28 | 16 | 2 | 6  | 36 |
| Yinchuan   | Ningxia | NEC | 27 | 2 | 13 | 48 | 29 | 3 | 16 | 45 | 25 | 2 | 10 | 44 |
| Zhongwei   | Ningxia | NEC | 13 | 1 | 7  | 18 | 17 | 1 | 9  | 22 | 15 | 1 | 6  | 33 |

|           |          |     |    |   |    |    |    |   |    |    |    |   |    |    |
|-----------|----------|-----|----|---|----|----|----|---|----|----|----|---|----|----|
| Aksu      | Sinkiang | NEC | 23 | 2 | 12 | 42 | 21 | 2 | 11 | 38 | 22 | 2 | 8  | 40 |
| Hami      | Sinkiang | NEC | 11 | 1 | 4  | 21 | 9  | 1 | 4  | 19 | 12 | 1 | 5  | 29 |
| Hotan     | Sinkiang | NEC | 21 | 2 | 11 | 35 | 18 | 2 | 10 | 29 | 23 | 2 | 11 | 39 |
| Kashgar   | Sinkiang | NEC | 22 | 2 | 10 | 36 | 19 | 2 | 9  | 36 | 23 | 2 | 11 | 44 |
| Karamay   | Sinkiang | NEC | 15 | 1 | 5  | 28 | 14 | 1 | 6  | 28 | 14 | 1 | 6  | 36 |
| Kizilsu   | Sinkiang | NEC | 9  | 1 | 1  | 19 | 9  | 1 | 6  | 15 | 9  | 1 | 1  | 19 |
| Shihezi   | Sinkiang | NEC | 28 | 3 | 7  | 64 | 22 | 3 | 6  | 38 | 26 | 2 | 10 | 63 |
| Urumchi   | Sinkiang | NEC | 41 | 2 | 20 | 58 | 38 | 2 | 24 | 50 | 35 | 3 | 15 | 72 |
| Wujiaqu   | Sinkiang | NEC | 30 | 3 | 9  | 53 | 24 | 3 | 10 | 49 | 21 | 2 | 4  | 56 |
| Yili      | Sinkiang | NEC | 25 | 2 | 11 | 34 | 24 | 2 | 12 | 34 | 26 | 2 | 10 | 52 |
| Ezhou     | Hubei    | NEC | 13 | 1 | 8  | 24 | 19 | 1 | 11 | 30 | 21 | 1 | 10 | 37 |
| Huanggang | Hubei    | NEC | 14 | 2 | 4  | 23 | 14 | 1 | 6  | 26 | 20 | 2 | 8  | 43 |
| Jingmen   | Hubei    | NEC | 18 | 1 | 12 | 38 | 27 | 2 | 17 | 38 | 25 | 2 | 13 | 43 |
| Shiyan    | Hubei    | NEC | 12 | 1 | 8  | 19 | 13 | 0 | 10 | 16 | 15 | 1 | 8  | 21 |
| Wuhan     | Hubei    | NEC | 27 | 2 | 11 | 52 | 41 | 4 | 18 | 64 | 40 | 3 | 19 | 86 |
| Xianning  | Hubei    | NEC | 12 | 0 | 9  | 16 | 15 | 1 | 11 | 19 | 16 | 1 | 9  | 24 |
| Xiangyang | Hubei    | NEC | 17 | 1 | 10 | 34 | 23 | 1 | 16 | 31 | 30 | 2 | 16 | 60 |
| Xiaogan   | Hubei    | NEC | 5  | 1 | 2  | 12 | 9  | 1 | 4  | 20 | 17 | 2 | 6  | 41 |
| Yichang   | Hubei    | NEC | 24 | 1 | 19 | 32 | 26 | 1 | 23 | 32 | 33 | 1 | 23 | 46 |
| Anqing    | Anhui    | NEC | 21 | 2 | 12 | 37 | 21 | 2 | 14 | 46 | 21 | 1 | 14 | 35 |
| Bengbu    | Anhui    | NEC | 24 | 2 | 11 | 40 | 32 | 2 | 20 | 42 | 33 | 2 | 21 | 59 |
| Bozhou    | Anhui    | NEC | 33 | 1 | 24 | 45 | 46 | 2 | 35 | 72 | 41 | 2 | 27 | 80 |
| Chuzhou   | Anhui    | NEC | 29 | 2 | 18 | 41 | 22 | 1 | 11 | 30 | 22 | 2 | 12 | 38 |
| Fuyang    | Anhui    | NEC | 28 | 1 | 21 | 46 | 43 | 3 | 30 | 64 | 41 | 2 | 25 | 70 |
| Hefei     | Anhui    | NEC | 24 | 2 | 14 | 38 | 31 | 3 | 19 | 58 | 29 | 2 | 18 | 48 |
| Huaibei   | Anhui    | NEC | 19 | 1 | 14 | 25 | 24 | 1 | 18 | 32 | 28 | 2 | 18 | 54 |

|             |              |     |    |   |    |    |    |   |    |    |    |   |    |    |
|-------------|--------------|-----|----|---|----|----|----|---|----|----|----|---|----|----|
| Huainan     | Anhui        | NEC | 18 | 1 | 11 | 29 | 20 | 1 | 13 | 26 | 23 | 1 | 14 | 34 |
| Huangshan   | Anhui        | NEC | 9  | 0 | 8  | 10 | 9  | 0 | 8  | 10 | 10 | 0 | 8  | 12 |
| Lu'an       | Anhui        | NEC | 15 | 1 | 8  | 27 | 15 | 1 | 9  | 21 | 15 | 1 | 7  | 26 |
| Ma'anshan   | Anhui        | NEC | 20 | 1 | 10 | 30 | 21 | 1 | 15 | 28 | 19 | 1 | 6  | 42 |
| Suzhou      | Anhui        | NEC | 18 | 0 | 15 | 21 | 19 | 1 | 16 | 26 | 21 | 1 | 16 | 35 |
| Tongling    | Anhui        | NEC | 25 | 2 | 15 | 35 | 31 | 2 | 18 | 47 | 30 | 1 | 18 | 42 |
| Wuhu        | Anhui        | NEC | 38 | 1 | 30 | 51 | 38 | 2 | 29 | 49 | 40 | 2 | 24 | 79 |
| Changzhou   | Jiangsu      | NEC | 33 | 3 | 16 | 70 | 34 | 3 | 15 | 51 | 33 | 2 | 20 | 67 |
| Huaian      | Jiangsu      | NEC | 12 | 1 | 3  | 22 | 15 | 2 | 5  | 30 | 16 | 1 | 6  | 33 |
| Lianyungang | Jiangsu      | NEC | 17 | 1 | 9  | 27 | 24 | 1 | 16 | 32 | 25 | 2 | 10 | 39 |
| Nanjing     | Jiangsu      | NEC | 36 | 2 | 19 | 54 | 39 | 3 | 25 | 61 | 44 | 2 | 20 | 77 |
| Nantong     | Jiangsu      | NEC | 24 | 3 | 7  | 49 | 25 | 3 | 8  | 50 | 24 | 1 | 12 | 39 |
| Suzhou      | Jiangsu      | NEC | 31 | 2 | 18 | 46 | 42 | 2 | 32 | 57 | 42 | 2 | 27 | 59 |
| Suqian      | Jiangsu      | NEC | 26 | 2 | 8  | 38 | 27 | 1 | 20 | 39 | 30 | 2 | 10 | 57 |
| Taizhou     | Jiangsu      | NEC | 19 | 2 | 8  | 33 | 20 | 1 | 14 | 34 | 23 | 1 | 15 | 30 |
| Wuxi        | Jiangsu      | NEC | 27 | 2 | 15 | 51 | 34 | 1 | 27 | 48 | 31 | 1 | 18 | 42 |
| Xuzhou      | Jiangsu      | NEC | 26 | 2 | 12 | 43 | 33 | 2 | 21 | 48 | 35 | 2 | 18 | 74 |
| Yanchen     | Jiangsu      | NEC | 17 | 1 | 8  | 26 | 22 | 1 | 14 | 32 | 21 | 1 | 11 | 36 |
| Yangzhou    | Jiangsu      | NEC | 23 | 2 | 7  | 48 | 18 | 1 | 12 | 28 | 21 | 1 | 9  | 32 |
| Zhenjiang   | Jiangsu      | NEC | 27 | 2 | 16 | 44 | 35 | 2 | 18 | 49 | 29 | 1 | 18 | 41 |
| Shanghai    | Municipality | NEC | 21 | 2 | 9  | 33 | 36 | 3 | 19 | 54 | 29 | 1 | 17 | 44 |
| Hangzhou    | Zhejiang     | NEC | 29 | 2 | 11 | 48 | 33 | 2 | 20 | 45 | 40 | 2 | 20 | 73 |
| Huzhou      | Zhejiang     | NEC | 25 | 2 | 9  | 40 | 32 | 2 | 22 | 49 | 30 | 3 | 12 | 74 |
| Jiaxing     | Zhejiang     | NEC | 19 | 2 | 6  | 30 | 29 | 2 | 19 | 51 | 33 | 2 | 15 | 61 |
| Jinhua      | Zhejiang     | NEC | 20 | 1 | 9  | 31 | 25 | 2 | 8  | 38 | 32 | 2 | 14 | 50 |
| Lishui      | Zhejiang     | NEC | 14 | 1 | 5  | 20 | 14 | 1 | 10 | 19 | 20 | 1 | 10 | 36 |



|             |          |     |    |   |    |    |    |   |    |    |    |   |    |    |
|-------------|----------|-----|----|---|----|----|----|---|----|----|----|---|----|----|
| Ningbo      | Zhejiang | NEC | 21 | 2 | 8  | 38 | 29 | 2 | 14 | 42 | 36 | 3 | 13 | 66 |
| Quzhou      | Zhejiang | NEC | 20 | 1 | 9  | 31 | 26 | 2 | 8  | 41 | 28 | 1 | 16 | 45 |
| Shaoxing    | Zhejiang | NEC | 26 | 2 | 11 | 39 | 38 | 1 | 28 | 49 | 40 | 2 | 20 | 64 |
| Taizhou     | Zhejiang | NEC | 11 | 1 | 1  | 20 | 15 | 2 | 7  | 25 | 18 | 1 | 4  | 28 |
| Wenjiang    | Zhejiang | NEC | 25 | 3 | 2  | 44 | 29 | 3 | 10 | 45 | 34 | 2 | 12 | 55 |
| Zhoushan    | Zhejiang | NEC | 11 | 1 | 3  | 24 | 14 | 1 | 5  | 20 | 13 | 1 | 5  | 23 |
| Fuzhou      | Jiangxi  | NEC | 10 | 1 | 5  | 14 | 12 | 1 | 6  | 19 | 13 | 1 | 7  | 22 |
| Ganzhou     | Jiangxi  | NEC | 13 | 1 | 7  | 18 | 15 | 1 | 10 | 20 | 16 | 1 | 11 | 22 |
| Ji'an       | Jiangxi  | NEC | 9  | 1 | 5  | 18 | 14 | 1 | 8  | 22 | 15 | 1 | 7  | 27 |
| Jingdezhen  | Jiangxi  | NEC | 12 | 1 | 5  | 32 | 12 | 1 | 6  | 18 | 13 | 1 | 8  | 23 |
| Jiujiang    | Jiangxi  | NEC | 15 | 1 | 8  | 25 | 19 | 1 | 12 | 29 | 20 | 1 | 11 | 31 |
| Nanchang    | Jiangxi  | NEC | 20 | 2 | 8  | 35 | 21 | 2 | 14 | 40 | 19 | 1 | 12 | 27 |
| Pingxiang   | Jiangxi  | NEC | 10 | 1 | 5  | 15 | 15 | 1 | 10 | 18 | 14 | 1 | 7  | 21 |
| Shangrao    | Jiangxi  | NEC | 14 | 1 | 8  | 21 | 18 | 1 | 12 | 28 | 21 | 1 | 13 | 28 |
| Xinyu       | Jiangxi  | NEC | 11 | 1 | 5  | 16 | 12 | 1 | 7  | 18 | 14 | 1 | 9  | 22 |
| Yichun      | Jiangxi  | NEC | 13 | 0 | 9  | 17 | 14 | 1 | 10 | 19 | 16 | 1 | 10 | 23 |
| Yingtian    | Jiangxi  | NEC | 10 | 0 | 6  | 14 | 13 | 1 | 9  | 18 | 18 | 1 | 9  | 22 |
| Changsha    | Hunan    | NEC | 19 | 1 | 9  | 31 | 27 | 1 | 16 | 33 | 26 | 2 | 15 | 48 |
| Changde     | Hunan    | NEC | 13 | 1 | 6  | 24 | 11 | 1 | 8  | 16 | 13 | 1 | 7  | 22 |
| Chenzhou    | Hunan    | NEC | 18 | 1 | 9  | 26 | 20 | 1 | 12 | 25 | 23 | 1 | 13 | 36 |
| Huaihua     | Hunan    | NEC | 8  | 1 | 4  | 14 | 14 | 1 | 5  | 22 | 12 | 1 | 4  | 21 |
| Loudi       | Hunan    | NEC | 11 | 1 | 6  | 16 | 12 | 1 | 8  | 18 | 10 | 0 | 4  | 15 |
| Xiangtan    | Hunan    | NEC | 24 | 1 | 13 | 34 | 30 | 2 | 17 | 42 | 31 | 2 | 16 | 53 |
| Yiyang      | Hunan    | NEC | 15 | 1 | 9  | 22 | 18 | 1 | 12 | 27 | 19 | 1 | 10 | 34 |
| Yongzhou    | Hunan    | NEC | 19 | 1 | 14 | 25 | 21 | 1 | 14 | 28 | 24 | 1 | 13 | 32 |
| Zhangjiajie | Hunan    | NEC | 18 | 1 | 11 | 29 | 22 | 1 | 18 | 26 | 21 | 1 | 15 | 28 |

|           |           |     |    |   |    |    |    |   |    |    |    |   |    |    |
|-----------|-----------|-----|----|---|----|----|----|---|----|----|----|---|----|----|
| Zhuzhou   | Hunan     | NEC | 17 | 1 | 12 | 25 | 25 | 1 | 18 | 30 | 27 | 1 | 17 | 39 |
| Dongguan  | Guangdong | NEC | 31 | 2 | 20 | 45 | 31 | 2 | 24 | 49 | 28 | 2 | 4  | 46 |
| Foshan    | Guangdong | NEC | 32 | 2 | 20 | 44 | 41 | 1 | 33 | 49 | 29 | 1 | 18 | 44 |
| Guangzhou | Guangdong | NEC | 35 | 1 | 23 | 47 | 38 | 2 | 28 | 48 | 41 | 2 | 21 | 60 |
| Heyuan    | Guangdong | NEC | 18 | 1 | 10 | 27 | 19 | 1 | 11 | 26 | 20 | 1 | 13 | 39 |
| Huizhou   | Guangdong | NEC | 19 | 1 | 10 | 27 | 17 | 1 | 13 | 25 | 20 | 2 | 8  | 39 |
| Jiangmen  | Guangdong | NEC | 14 | 1 | 9  | 20 | 25 | 1 | 19 | 34 | 20 | 2 | 8  | 37 |
| Maoming   | Guangdong | NEC | 10 | 1 | 6  | 14 | 12 | 1 | 9  | 15 | 10 | 0 | 6  | 15 |
| Meizhou   | Guangdong | NEC | 15 | 1 | 10 | 19 | 16 | 1 | 11 | 25 | 19 | 1 | 12 | 28 |
| Qingyuan  | Guangdong | NEC | 33 | 1 | 22 | 44 | 24 | 2 | 14 | 40 | 24 | 1 | 13 | 40 |
| Shantou   | Guangdong | NEC | 16 | 1 | 10 | 26 | 16 | 1 | 12 | 19 | 13 | 1 | 7  | 22 |
| Shaoguan  | Guangdong | NEC | 19 | 1 | 12 | 25 | 15 | 1 | 10 | 18 | 18 | 1 | 9  | 34 |
| Shenzhen  | Guangdong | NEC | 34 | 2 | 22 | 47 | 33 | 2 | 24 | 48 | 30 | 1 | 21 | 45 |
| Zhujiang  | Guangdong | NEC | 14 | 1 | 6  | 20 | 16 | 1 | 8  | 22 | 13 | 1 | 6  | 23 |
| Zhaoqing  | Guangdong | NEC | 20 | 1 | 13 | 30 | 26 | 2 | 12 | 41 | 23 | 1 | 15 | 35 |
| Zhongshan | Guangdong | NEC | 15 | 1 | 8  | 31 | 24 | 2 | 14 | 33 | 19 | 1 | 9  | 31 |
| Zhuhai    | Guangdong | NEC | 17 | 1 | 10 | 28 | 25 | 1 | 19 | 31 | 19 | 1 | 10 | 28 |
| Fuzhou    | Fujian    | NEC | 21 | 1 | 4  | 30 | 22 | 2 | 8  | 36 | 24 | 2 | 9  | 47 |
| Longyan   | Fujian    | NEC | 17 | 1 | 9  | 28 | 17 | 1 | 13 | 20 | 20 | 1 | 10 | 31 |
| Nanping   | Fujian    | NEC | 10 | 1 | 7  | 15 | 9  | 1 | 6  | 13 | 10 | 0 | 6  | 14 |
| Ningde    | Fujian    | NEC | 13 | 1 | 3  | 22 | 14 | 1 | 8  | 19 | 17 | 1 | 7  | 31 |
| Putian    | Fujian    | NEC | 15 | 1 | 3  | 23 | 13 | 1 | 5  | 19 | 13 | 1 | 4  | 20 |
| Quanzhou  | Fujian    | NEC | 18 | 2 | 2  | 27 | 14 | 1 | 6  | 23 | 16 | 1 | 8  | 34 |
| Sanming   | Fujian    | NEC | 22 | 1 | 12 | 29 | 20 | 1 | 11 | 31 | 23 | 1 | 15 | 33 |
| Xiamen    | Fujian    | NEC | 26 | 1 | 15 | 41 | 22 | 1 | 17 | 28 | 19 | 1 | 11 | 34 |
| Zhangzhou | Fujian    | NEC | 18 | 1 | 10 | 22 | 19 | 1 | 16 | 24 | 22 | 1 | 13 | 38 |

|           |              |     |    |   |    |    |    |   |    |    |    |   |    |    |
|-----------|--------------|-----|----|---|----|----|----|---|----|----|----|---|----|----|
| Haikou    | Hainan       | NEC | 13 | 1 | 8  | 21 | 16 | 1 | 12 | 21 | 12 | 1 | 5  | 26 |
| Sanya     | Hainan       | NEC | 11 | 1 | 7  | 19 | 14 | 1 | 9  | 20 | 13 | 1 | 4  | 21 |
| Chongqing | Municipality | NEC | 29 | 2 | 20 | 48 | 46 | 2 | 35 | 57 | 37 | 1 | 22 | 52 |
| Bazhong   | Sichuan      | NEC | 18 | 1 | 11 | 23 | 22 | 1 | 17 | 27 | 21 | 1 | 15 | 35 |
| Chengdu   | Sichuan      | NEC | 39 | 3 | 15 | 63 | 54 | 4 | 25 | 81 | 43 | 2 | 26 | 73 |
| Dazhou    | Sichuan      | NEC | 31 | 1 | 21 | 38 | 35 | 1 | 26 | 45 | 34 | 1 | 24 | 42 |
| Deyang    | Sichuan      | NEC | 25 | 2 | 9  | 39 | 30 | 2 | 17 | 48 | 24 | 2 | 9  | 45 |
| Guangyuan | Sichuan      | NEC | 24 | 1 | 19 | 39 | 26 | 2 | 18 | 40 | 27 | 1 | 13 | 37 |
| Leshan    | Sichuan      | NEC | 23 | 1 | 15 | 35 | 28 | 2 | 17 | 42 | 24 | 1 | 17 | 37 |
| Luzhou    | Sichuan      | NEC | 20 | 1 | 11 | 30 | 28 | 2 | 12 | 41 | 23 | 1 | 10 | 34 |
| Meishan   | Sichuan      | NEC | 19 | 1 | 10 | 34 | 25 | 2 | 15 | 39 | 22 | 1 | 14 | 39 |
| Mianyang  | Sichuan      | NEC | 32 | 2 | 17 | 43 | 37 | 2 | 21 | 51 | 28 | 2 | 15 | 77 |
| Nanchong  | Sichuan      | NEC | 20 | 2 | 11 | 31 | 29 | 1 | 18 | 36 | 33 | 2 | 21 | 62 |
| Panzhihua | Sichuan      | NEC | 25 | 1 | 21 | 35 | 27 | 1 | 23 | 35 | 24 | 1 | 18 | 30 |
| Suining   | Sichuan      | NEC | 11 | 1 | 4  | 19 | 16 | 1 | 7  | 27 | 14 | 1 | 5  | 23 |
| Ya'an     | Sichuan      | NEC | 22 | 1 | 16 | 35 | 21 | 1 | 16 | 23 | 24 | 1 | 16 | 30 |
| Ziyang    | Sichuan      | NEC | 13 | 1 | 9  | 23 | 20 | 1 | 15 | 29 | 16 | 1 | 10 | 23 |
| Zigong    | Sichuan      | NEC | 22 | 1 | 15 | 34 | 28 | 2 | 16 | 38 | 23 | 1 | 17 | 44 |
| Baoshan   | Yunnan       | NEC | 14 | 0 | 10 | 18 | 15 | 1 | 10 | 19 | 16 | 1 | 11 | 23 |
| Chuxiong  | Yunnan       | NEC | 16 | 1 | 8  | 22 | 23 | 2 | 7  | 34 | 14 | 1 | 7  | 22 |
| Dali      | Yunnan       | NEC | 11 | 1 | 6  | 19 | 12 | 1 | 4  | 20 | 10 | 1 | 6  | 16 |
| Dehong    | Yunnan       | NEC | 10 | 0 | 7  | 13 | 10 | 0 | 8  | 13 | 14 | 0 | 9  | 18 |
| Honghe    | Yunnan       | NEC | 10 | 1 | 5  | 19 | 14 | 1 | 10 | 20 | 8  | 1 | 3  | 15 |
| Kunming   | Yunnan       | NEC | 20 | 1 | 13 | 27 | 28 | 2 | 16 | 39 | 23 | 1 | 16 | 32 |
| Lijiang   | Yunnan       | NEC | 11 | 0 | 8  | 15 | 13 | 0 | 11 | 17 | 11 | 1 | 5  | 15 |
| Lincang   | Yunnan       | NEC | 10 | 0 | 7  | 15 | 11 | 1 | 9  | 17 | 10 | 1 | 4  | 15 |

|               |         |     |    |   |    |    |    |   |    |    |    |   |    |    |
|---------------|---------|-----|----|---|----|----|----|---|----|----|----|---|----|----|
| Nujiang       | Yunnan  | NEC | 7  | 0 | 5  | 11 | 9  | 0 | 7  | 11 | 9  | 0 | 7  | 12 |
| Qujing        | Yunnan  | NEC | 17 | 1 | 11 | 24 | 20 | 1 | 15 | 31 | 17 | 1 | 11 | 26 |
| Wenshan       | Yunnan  | NEC | 12 | 1 | 7  | 19 | 17 | 1 | 11 | 25 | 11 | 0 | 7  | 17 |
| Xishuangbanna | Yunnan  | NEC | 9  | 0 | 7  | 14 | 11 | 1 | 7  | 14 | 12 | 1 | 6  | 18 |
| Tuxi          | Yunnan  | NEC | 15 | 1 | 8  | 21 | 19 | 1 | 14 | 25 | 14 | 1 | 9  | 20 |
| Zhaotong      | Yunnan  | NEC | 17 | 1 | 11 | 26 | 22 | 1 | 12 | 30 | 15 | 1 | 10 | 23 |
| Anshun        | Guizhou | NEC | 9  | 1 | 4  | 24 | 15 | 2 | 5  | 29 | 10 | 1 | 5  | 21 |
| Bijie         | Guizhou | NEC | 23 | 2 | 11 | 36 | 27 | 2 | 18 | 39 | 22 | 1 | 10 | 38 |
| Guiyang       | Guizhou | NEC | 20 | 1 | 13 | 32 | 29 | 2 | 16 | 44 | 22 | 1 | 15 | 40 |
| Liupanshui    | Guizhou | NEC | 23 | 1 | 16 | 40 | 31 | 2 | 19 | 49 | 23 | 1 | 18 | 35 |
| Tongren       | Guizhou | NEC | 14 | 1 | 9  | 18 | 18 | 1 | 13 | 21 | 18 | 1 | 10 | 26 |
| Zunyi         | Guizhou | NEC | 20 | 1 | 16 | 27 | 32 | 2 | 15 | 42 | 25 | 1 | 16 | 36 |
| Baise         | Guangxi | NEC | 12 | 1 | 8  | 19 | 9  | 1 | 3  | 18 | 10 | 1 | 5  | 16 |
| Beihai        | Guangxi | NEC | 10 | 1 | 6  | 16 | 9  | 1 | 6  | 14 | 10 | 1 | 6  | 18 |
| Chongzuo      | Guangxi | NEC | 13 | 1 | 6  | 24 | 16 | 1 | 8  | 25 | 12 | 1 | 5  | 24 |
| Fangchenggang | Guangxi | NEC | 11 | 0 | 7  | 14 | 12 | 1 | 8  | 16 | 12 | 0 | 7  | 17 |
| Guigang       | Guangxi | NEC | 20 | 1 | 13 | 25 | 20 | 1 | 12 | 27 | 18 | 1 | 9  | 29 |
| Guilin        | Guangxi | NEC | 15 | 1 | 10 | 20 | 17 | 1 | 13 | 22 | 17 | 1 | 10 | 24 |
| Hechi         | Guangxi | NEC | 13 | 1 | 9  | 21 | 15 | 1 | 9  | 21 | 20 | 1 | 13 | 34 |
| Hezhou        | Guangxi | NEC | 9  | 0 | 5  | 13 | 8  | 1 | 5  | 14 | 8  | 1 | 4  | 13 |
| Laibin        | Guangxi | NEC | 14 | 1 | 8  | 20 | 16 | 1 | 8  | 26 | 15 | 1 | 10 | 27 |
| Liuzhou       | Guangxi | NEC | 19 | 1 | 13 | 30 | 18 | 1 | 9  | 27 | 19 | 1 | 11 | 30 |
| Nanning       | Guangxi | NEC | 25 | 2 | 15 | 45 | 28 | 2 | 17 | 45 | 25 | 1 | 17 | 41 |
| Qinzhou       | Guangxi | NEC | 15 | 1 | 8  | 22 | 16 | 1 | 11 | 24 | 16 | 1 | 12 | 26 |
| Wuzhou        | Guangxi | NEC | 19 | 1 | 14 | 24 | 17 | 1 | 11 | 28 | 18 | 1 | 11 | 27 |
| Yulin         | Guangxi | NEC | 15 | 1 | 9  | 25 | 17 | 1 | 10 | 27 | 17 | 1 | 11 | 25 |

|          |         |     |    |   |    |    |    |   |    |    |    |   |    |    |
|----------|---------|-----|----|---|----|----|----|---|----|----|----|---|----|----|
| Golog    | Qinghai | NEC | 32 | 1 | 22 | 40 | 38 | 1 | 30 | 49 | 30 | 1 | 21 | 45 |
| Haidong  | Qinghai | NEC | 31 | 2 | 19 | 45 | 37 | 2 | 24 | 60 | 35 | 1 | 24 | 47 |
| Xining   | Qinghai | NEC | 28 | 1 | 17 | 38 | 28 | 1 | 20 | 42 | 31 | 1 | 19 | 47 |
| Ali      | Tibet   | NEC | 3  | 0 | 2  | 5  | 4  | 0 | 3  | 7  | 6  | 1 | 2  | 11 |
| Qamdo    | Tibet   | NEC | 16 | 1 | 11 | 32 | 14 | 1 | 10 | 24 | 16 | 1 | 6  | 27 |
| Lhasa    | Tibet   | NEC | 20 | 1 | 13 | 32 | 18 | 1 | 12 | 23 | 18 | 1 | 10 | 29 |
| Nyingchi | Tibet   | NEC | 6  | 0 | 3  | 8  | 6  | 0 | 4  | 8  | 6  | 0 | 3  | 14 |
| Naqu     | Tibet   | NEC | 12 | 0 | 9  | 16 | 14 | 1 | 10 | 19 | 15 | 1 | 10 | 26 |
| Shigatse | Tibet   | NEC | 15 | 3 | 7  | 52 | 11 | 0 | 9  | 14 | 10 | 1 | 5  | 18 |
| Lhoka    | Tibet   | NEC | 8  | 0 | 3  | 10 | 9  | 1 | 5  | 14 | 8  | 0 | 4  | 13 |

146 <sup>a</sup> EC and NEC denote emission control and non-emission control regions, respectively, of which the latter means regions without implementation  
147 of emission control measures.

148 <sup>b</sup> The pre-Parade Blue, Parade Blue, and post-Parade Blue periods indicate the periods of 1-19 August, 20 August-3 September, and 4-30  
149 September 2015, respectively.

150

151

152

153

154

155

156

157

158 **Table S5.** Summary of daily average SO<sub>2</sub> concentrations (µg m<sup>-3</sup>) during the pre-Parade Blue, Parade Blue and post-Parade Blue periods in the  
 159 291 cities across China.

| City         | Province     | Region <sup>a</sup> | Pre-Parade Blue period <sup>b</sup> |    |     |     | Parade Blue period <sup>b</sup> |    |     |     | Post-Parade Blue period <sup>b</sup> |    |     |     |
|--------------|--------------|---------------------|-------------------------------------|----|-----|-----|---------------------------------|----|-----|-----|--------------------------------------|----|-----|-----|
|              |              |                     | Mean                                | SE | Min | Max | Mean                            | SE | Min | Max | Mean                                 | SE | Min | Max |
| Beijing      | Municipality | EC                  | 3                                   | 0  | 2   | 7   | 2                               | 0  | 2   | 3   | 5                                    | 1  | 2   | 15  |
| Tianjing     | Municipality | EC                  | 10                                  | 1  | 4   | 16  | 10                              | 1  | 4   | 23  | 13                                   | 1  | 4   | 27  |
| Baoding      | Hebei        | EC                  | 17                                  | 1  | 11  | 25  | 10                              | 1  | 6   | 16  | 15                                   | 1  | 8   | 27  |
| Cangzhou     | Hebei        | EC                  | 3                                   | 0  | 2   | 7   | 2                               | 0  | 2   | 3   | 32                                   | 3  | 11  | 80  |
| Chengde      | Hebei        | EC                  | 9                                   | 1  | 5   | 18  | 6                               | 1  | 3   | 18  | 8                                    | 1  | 3   | 20  |
| Handan       | Hebei        | EC                  | 28                                  | 2  | 16  | 48  | 34                              | 5  | 9   | 62  | 25                                   | 2  | 8   | 58  |
| Hengshui     | Hebei        | EC                  | 17                                  | 1  | 10  | 23  | 12                              | 1  | 3   | 20  | 22                                   | 2  | 7   | 52  |
| Langfang     | Hebei        | EC                  | 9                                   | 1  | 4   | 19  | 4                               | 0  | 2   | 8   | 10                                   | 2  | 2   | 40  |
| Qinhuangdao  | Hebei        | EC                  | 32                                  | 3  | 17  | 48  | 18                              | 2  | 10  | 46  | 18                                   | 2  | 10  | 46  |
| Shijiazhuang | Hebei        | EC                  | 19                                  | 2  | 7   | 39  | 13                              | 1  | 6   | 19  | 30                                   | 3  | 7   | 52  |
| Tangshan     | Hebei        | EC                  | 29                                  | 3  | 12  | 64  | 29                              | 4  | 13  | 68  | 39                                   | 3  | 16  | 73  |
| Xingtai      | Hebei        | EC                  | 25                                  | 4  | 8   | 74  | 18                              | 4  | 3   | 45  | 32                                   | 4  | 4   | 71  |
| Zhangjiakou  | Hebei        | EC                  | 12                                  | 1  | 7   | 19  | 12                              | 1  | 9   | 22  | 12                                   | 1  | 5   | 24  |
| Changzhi     | Shanxi       | EC                  | 32                                  | 2  | 18  | 59  | 28                              | 3  | 10  | 50  | 25                                   | 2  | 9   | 51  |
| Datong       | Shanxi       | EC                  | 20                                  | 2  | 12  | 37  | 18                              | 1  | 12  | 28  | 22                                   | 2  | 9   | 58  |
| Jincheng     | Shanxi       | EC                  | 29                                  | 2  | 14  | 46  | 25                              | 2  | 12  | 38  | 31                                   | 3  | 9   | 65  |
| Jinzhong     | Shanxi       | EC                  | 13                                  | 3  | 3   | 37  | 16                              | 2  | 7   | 29  | 31                                   | 4  | 6   | 74  |
| Linfen       | Shanxi       | EC                  | 17                                  | 1  | 7   | 32  | 14                              | 1  | 8   | 23  | 16                                   | 2  | 3   | 37  |
| Lvliang      | Shanxi       | EC                  | 43                                  | 2  | 31  | 56  | 24                              | 2  | 13  | 42  | 33                                   | 3  | 11  | 75  |
| Shuozhou     | Shanxi       | EC                  | 39                                  | 3  | 18  | 60  | 37                              | 3  | 17  | 52  | 27                                   | 2  | 11  | 45  |
| Taiyuan      | Shanxi       | EC                  | 21                                  | 2  | 9   | 43  | 18                              | 1  | 11  | 24  | 25                                   | 2  | 10  | 55  |

|             |                |    |    |   |    |    |    |   |    |     |    |   |    |     |
|-------------|----------------|----|----|---|----|----|----|---|----|-----|----|---|----|-----|
| Xinzhou     | Shanxi         | EC | 41 | 3 | 23 | 58 | 32 | 1 | 21 | 39  | 36 | 3 | 13 | 69  |
| Yangquan    | Shanxi         | EC | 24 | 2 | 7  | 36 | 21 | 2 | 7  | 35  | 30 | 3 | 7  | 79  |
| Yuncheng    | Shanxi         | EC | 19 | 1 | 9  | 34 | 45 | 6 | 20 | 101 | 43 | 4 | 15 | 119 |
| Binzhou     | Shandong       | EC | 30 | 4 | 9  | 87 | 26 | 3 | 11 | 60  | 38 | 3 | 14 | 89  |
| Dezhou      | Shandong       | EC | 18 | 2 | 5  | 35 | 21 | 2 | 11 | 41  | 30 | 3 | 11 | 70  |
| Dongying    | Shandong       | EC | 45 | 3 | 21 | 81 | 31 | 3 | 16 | 57  | 33 | 3 | 10 | 69  |
| Jinan       | Shandong       | EC | 21 | 1 | 12 | 32 | 20 | 2 | 12 | 33  | 28 | 2 | 14 | 51  |
| Jining      | Shandong       | EC | 36 | 3 | 21 | 88 | 43 | 3 | 21 | 66  | 50 | 3 | 25 | 82  |
| Laiwu       | Shandong       | EC | 22 | 3 | 6  | 46 | 32 | 2 | 15 | 42  | 38 | 3 | 16 | 61  |
| Liaocheng   | Shandong       | EC | 20 | 2 | 7  | 36 | 21 | 2 | 12 | 45  | 34 | 2 | 15 | 53  |
| Linyi       | Shandong       | EC | 15 | 2 | 5  | 42 | 20 | 1 | 13 | 32  | 24 | 2 | 7  | 49  |
| Qingdao     | Shandong       | EC | 17 | 1 | 12 | 28 | 20 | 1 | 14 | 33  | 20 | 1 | 13 | 27  |
| Rizhao      | Shandong       | EC | 13 | 1 | 8  | 23 | 16 | 1 | 11 | 26  | 18 | 1 | 9  | 41  |
| Tai'an      | Shandong       | EC | 20 | 2 | 8  | 34 | 28 | 2 | 14 | 46  | 31 | 2 | 13 | 55  |
| Weihai      | Shandong       | EC | 10 | 1 | 3  | 20 | 13 | 1 | 8  | 18  | 14 | 1 | 6  | 29  |
| Weifang     | Shandong       | EC | 19 | 2 | 11 | 38 | 27 | 3 | 13 | 62  | 26 | 2 | 13 | 68  |
| Yantai      | Shandong       | EC | 11 | 1 | 5  | 18 | 12 | 1 | 7  | 15  | 13 | 1 | 8  | 23  |
| Zaozhuang   | Shandong       | EC | 36 | 3 | 14 | 57 | 60 | 3 | 43 | 82  | 53 | 5 | 10 | 136 |
| Zibo        | Shandong       | EC | 54 | 6 | 21 | 94 | 61 | 8 | 22 | 114 | 62 | 5 | 27 | 111 |
| Alxa League | Inner Mongolia | EC | 5  | 1 | 1  | 11 | 7  | 1 | 2  | 13  | 5  | 0 | 2  | 10  |
| Bayannur    | Inner Mongolia | EC | 12 | 1 | 5  | 21 | 18 | 1 | 10 | 27  | 13 | 1 | 4  | 30  |
| Baotou      | Inner Mongolia | EC | 25 | 2 | 11 | 37 | 20 | 2 | 9  | 29  | 23 | 2 | 8  | 41  |
| Chifeng     | Inner Mongolia | EC | 14 | 1 | 9  | 25 | 12 | 1 | 8  | 18  | 15 | 1 | 7  | 24  |
| Ordos       | Inner Mongolia | EC | 11 | 1 | 4  | 22 | 14 | 1 | 7  | 26  | 14 | 1 | 5  | 36  |
| Hohhot      | Inner Mongolia | EC | 12 | 1 | 9  | 18 | 8  | 0 | 5  | 12  | 12 | 1 | 5  | 24  |
| Hulun Buir  | Inner Mongolia | EC | 2  | 0 | 1  | 4  | 3  | 0 | 1  | 7   | 3  | 0 | 2  | 8   |

|                |                |     |    |   |    |     |    |   |    |     |    |    |    |     |
|----------------|----------------|-----|----|---|----|-----|----|---|----|-----|----|----|----|-----|
| Tongliao       | Inner Mongolia | EC  | 12 | 1 | 6  | 19  | 8  | 1 | 4  | 15  | 12 | 1  | 5  | 21  |
| Wuhai          | Inner Mongolia | EC  | 48 | 7 | 6  | 122 | 34 | 7 | 4  | 95  | 57 | 11 | 3  | 178 |
| Hinggan League | Inner Mongolia | EC  | 5  | 0 | 2  | 9   | 3  | 0 | 2  | 6   | 7  | 1  | 3  | 17  |
| Anyang         | Henan          | EC  | 14 | 2 | 5  | 31  | 26 | 3 | 13 | 40  | 32 | 2  | 10 | 59  |
| Hebi           | Henan          | EC  | 18 | 1 | 12 | 30  | 17 | 2 | 9  | 28  | 28 | 2  | 11 | 46  |
| Jiaozuo        | Henan          | EC  | 20 | 2 | 5  | 33  | 23 | 2 | 10 | 37  | 28 | 3  | 9  | 65  |
| Kaifeng        | Henan          | EC  | 13 | 1 | 10 | 19  | 16 | 1 | 10 | 28  | 18 | 1  | 7  | 32  |
| Luoyang        | Henan          | EC  | 24 | 3 | 7  | 50  | 20 | 2 | 8  | 30  | 25 | 1  | 7  | 37  |
| Luohe          | Henan          | EC  | 13 | 1 | 7  | 30  | 16 | 1 | 12 | 21  | 28 | 3  | 11 | 84  |
| Nanyang        | Henan          | EC  | 22 | 1 | 10 | 33  | 22 | 1 | 15 | 29  | 19 | 2  | 8  | 37  |
| Pingdingshan   | Henan          | EC  | 32 | 2 | 15 | 49  | 32 | 2 | 23 | 46  | 34 | 2  | 15 | 57  |
| Sanmenxia      | Henan          | EC  | 18 | 1 | 8  | 28  | 25 | 2 | 13 | 42  | 26 | 2  | 10 | 45  |
| Shangqiu       | Henan          | EC  | 10 | 1 | 5  | 15  | 18 | 1 | 13 | 22  | 20 | 1  | 11 | 34  |
| Xinyang        | Henan          | EC  | 17 | 1 | 9  | 25  | 16 | 1 | 11 | 21  | 17 | 1  | 8  | 26  |
| Zhengzhou      | Henan          | EC  | 5  | 1 | 2  | 12  | 9  | 1 | 5  | 15  | 16 | 1  | 5  | 32  |
| Zhoukou        | Henan          | EC  | 7  | 0 | 6  | 9   | 9  | 0 | 6  | 11  | 12 | 1  | 7  | 20  |
| Zhumadian      | Henan          | EC  | 26 | 2 | 7  | 45  | 45 | 8 | 16 | 141 | 28 | 2  | 10 | 61  |
| Anshan         | Liaoning       | NEC | 14 | 1 | 7  | 25  | 19 | 1 | 12 | 26  | 21 | 1  | 11 | 36  |
| Benxi          | Liaoning       | NEC | 7  | 0 | 6  | 12  | 12 | 1 | 7  | 18  | 18 | 1  | 10 | 28  |
| Chaoyang       | Liaoning       | NEC | 9  | 1 | 4  | 13  | 10 | 1 | 7  | 15  | 14 | 1  | 8  | 26  |
| Dalian         | Liaoning       | NEC | 8  | 1 | 3  | 16  | 10 | 1 | 6  | 16  | 11 | 1  | 6  | 19  |
| Dandong        | Liaoning       | NEC | 7  | 0 | 5  | 9   | 9  | 1 | 7  | 13  | 12 | 0  | 8  | 15  |
| Fushun         | Liaoning       | NEC | 7  | 1 | 3  | 12  | 8  | 1 | 5  | 13  | 14 | 1  | 5  | 25  |
| Fuxin          | Liaoning       | NEC | 29 | 3 | 12 | 64  | 30 | 2 | 22 | 49  | 32 | 2  | 15 | 60  |
| Huludao        | Liaoning       | NEC | 20 | 3 | 7  | 56  | 29 | 2 | 20 | 43  | 28 | 2  | 10 | 52  |
| Jinzhou        | Liaoning       | NEC | 25 | 1 | 18 | 39  | 17 | 1 | 12 | 27  | 27 | 2  | 14 | 42  |



|              |              |     |    |   |    |    |    |   |    |    |    |   |    |    |
|--------------|--------------|-----|----|---|----|----|----|---|----|----|----|---|----|----|
| Liaoyang     | Liaoning     | NEC | 8  | 1 | 4  | 13 | 13 | 1 | 8  | 22 | 18 | 1 | 7  | 35 |
| Panjin       | Liaoning     | NEC | 12 | 1 | 6  | 21 | 18 | 1 | 13 | 27 | 18 | 1 | 9  | 31 |
| Shenyang     | Liaoning     | NEC | 12 | 1 | 4  | 24 | 10 | 1 | 6  | 16 | 18 | 2 | 5  | 34 |
| Tieling      | Liaoning     | NEC | 10 | 1 | 5  | 19 | 10 | 1 | 6  | 13 | 13 | 1 | 5  | 23 |
| Wafangdian   | Liaoning     | NEC | 2  | 0 | 1  | 4  | 3  | 0 | 2  | 7  | 6  | 1 | 1  | 16 |
| Yingkou      | Liaoning     | NEC | 11 | 1 | 6  | 16 | 11 | 1 | 8  | 18 | 14 | 1 | 7  | 30 |
| Baicheng     | Jilin        | NEC | 6  | 0 | 4  | 12 | 6  | 0 | 2  | 9  | 11 | 1 | 5  | 17 |
| Baishan      | Jilin        | NEC | 10 | 1 | 5  | 23 | 8  | 1 | 4  | 12 | 16 | 2 | 4  | 36 |
| Changchun    | Jilin        | NEC | 6  | 0 | 3  | 8  | 6  | 1 | 4  | 10 | 8  | 0 | 3  | 14 |
| Jilin        | Jilin        | NEC | 10 | 1 | 7  | 19 | 14 | 1 | 9  | 26 | 17 | 2 | 9  | 41 |
| Liaoyuan     | Jilin        | NEC | 6  | 1 | 4  | 23 | 9  | 1 | 4  | 18 | 14 | 1 | 7  | 22 |
| Siping       | Jilin        | NEC | 10 | 2 | 3  | 43 | 6  | 1 | 1  | 12 | 11 | 1 | 3  | 23 |
| Songyuan     | Jilin        | NEC | 5  | 1 | 2  | 26 | 2  | 0 | 1  | 4  | 5  | 0 | 2  | 11 |
| Daqing       | Heilongjiang | NEC | 9  | 1 | 7  | 15 | 9  | 1 | 7  | 16 | 9  | 1 | 5  | 17 |
| Daxinganling | Heilongjiang | NEC | 15 | 1 | 10 | 24 | 14 | 0 | 12 | 17 | 18 | 1 | 12 | 38 |
| Harbin       | Heilongjiang | NEC | 5  | 0 | 3  | 7  | 5  | 0 | 4  | 6  | 7  | 0 | 4  | 11 |
| Hegang       | Heilongjiang | NEC | 2  | 0 | 1  | 3  | 2  | 0 | 1  | 5  | 4  | 0 | 1  | 8  |
| Heihe        | Heilongjiang | NEC | 10 | 0 | 8  | 12 | 12 | 1 | 8  | 24 | 11 | 0 | 7  | 14 |
| Jixi         | Heilongjiang | NEC | 8  | 1 | 4  | 14 | 15 | 0 | 13 | 20 | 13 | 1 | 7  | 22 |
| Jiamusi      | Heilongjiang | NEC | 7  | 1 | 3  | 23 | 5  | 0 | 3  | 7  | 5  | 0 | 3  | 9  |
| Mudanjiang   | Heilongjiang | NEC | 7  | 0 | 5  | 10 | 8  | 0 | 5  | 10 | 6  | 0 | 3  | 10 |
| Qitaihe      | Heilongjiang | NEC | 18 | 0 | 16 | 21 | 17 | 1 | 14 | 29 | 15 | 0 | 9  | 18 |
| Qiqihar      | Heilongjiang | NEC | 13 | 2 | 8  | 32 | 5  | 1 | 1  | 11 | 4  | 0 | 2  | 8  |
| Shuangyashan | Heilongjiang | NEC | 14 | 1 | 9  | 31 | 10 | 1 | 6  | 18 | 10 | 1 | 6  | 17 |
| Suihua       | Heilongjiang | NEC | 9  | 1 | 3  | 18 | 9  | 1 | 4  | 14 | 8  | 1 | 2  | 24 |
| Ankang       | Shaanxi      | NEC | 11 | 1 | 3  | 23 | 11 | 1 | 6  | 16 | 14 | 1 | 8  | 20 |

|            |         |     |    |   |    |    |    |    |    |     |    |   |    |     |
|------------|---------|-----|----|---|----|----|----|----|----|-----|----|---|----|-----|
| Baoji      | Shaanxi | NEC | 3  | 0 | 2  | 4  | 5  | 0  | 3  | 7   | 5  | 0 | 2  | 9   |
| Hanzhong   | Shaanxi | NEC | 7  | 0 | 3  | 10 | 10 | 1  | 3  | 13  | 7  | 0 | 3  | 11  |
| Shangluo   | Shaanxi | NEC | 21 | 4 | 4  | 61 | 19 | 3  | 5  | 44  | 21 | 3 | 5  | 55  |
| Tongchuan  | Shaanxi | NEC | 4  | 0 | 2  | 7  | 9  | 1  | 6  | 14  | 8  | 1 | 2  | 19  |
| Weinan     | Shaanxi | NEC | 10 | 1 | 4  | 15 | 13 | 1  | 6  | 23  | 10 | 1 | 4  | 15  |
| Xi'an      | Shaanxi | NEC | 7  | 0 | 2  | 10 | 13 | 1  | 8  | 18  | 12 | 1 | 5  | 19  |
| Xianyang   | Shaanxi | NEC | 11 | 0 | 8  | 16 | 14 | 1  | 7  | 20  | 11 | 1 | 4  | 17  |
| Yan'an     | Shaanxi | NEC | 7  | 0 | 6  | 9  | 10 | 0  | 8  | 12  | 8  | 0 | 6  | 10  |
| Yulin      | Shaanxi | NEC | 5  | 1 | 2  | 10 | 8  | 1  | 3  | 11  | 6  | 1 | 1  | 14  |
| Baiying    | Gansu   | NEC | 24 | 5 | 3  | 97 | 71 | 12 | 14 | 161 | 38 | 5 | 3  | 111 |
| Dingxi     | Gansu   | NEC | 8  | 2 | 3  | 33 | 7  | 1  | 3  | 10  | 5  | 0 | 3  | 8   |
| Gannan     | Gansu   | NEC | 9  | 2 | 3  | 33 | 7  | 0  | 5  | 9   | 7  | 0 | 3  | 12  |
| Jiayuguan  | Gansu   | NEC | 21 | 2 | 11 | 39 | 11 | 2  | 6  | 31  | 21 | 2 | 3  | 43  |
| Jiuquan    | Gansu   | NEC | 9  | 1 | 3  | 27 | 7  | 2  | 2  | 24  | 6  | 0 | 3  | 13  |
| Lanzhou    | Gansu   | NEC | 12 | 1 | 6  | 23 | 11 | 1  | 5  | 17  | 13 | 1 | 7  | 22  |
| Linxia     | Gansu   | NEC | 8  | 1 | 2  | 12 | 10 | 0  | 8  | 13  | 9  | 1 | 2  | 14  |
| Pingliang  | Gansu   | NEC | 9  | 1 | 3  | 23 | 9  | 1  | 1  | 15  | 11 | 2 | 3  | 50  |
| Qingyang   | Gansu   | NEC | 5  | 0 | 3  | 8  | 6  | 0  | 2  | 9   | 4  | 0 | 1  | 7   |
| Tianshui   | Gansu   | NEC | 8  | 0 | 5  | 14 | 6  | 0  | 4  | 9   | 5  | 0 | 3  | 7   |
| Wuwei      | Gansu   | NEC | 7  | 0 | 5  | 10 | 9  | 0  | 7  | 13  | 8  | 0 | 5  | 12  |
| Zhangye    | Gansu   | NEC | 13 | 0 | 10 | 16 | 15 | 1  | 11 | 20  | 14 | 1 | 6  | 25  |
| Guyuan     | Ningxia | NEC | 7  | 1 | 3  | 13 | 8  | 1  | 3  | 15  | 4  | 0 | 2  | 10  |
| Shizuishan | Ningxia | NEC | 55 | 4 | 27 | 90 | 37 | 4  | 12 | 62  | 33 | 3 | 13 | 81  |
| Wuzhong    | Ningxia | NEC | 11 | 2 | 2  | 24 | 18 | 2  | 3  | 30  | 8  | 1 | 2  | 21  |
| Yinchuan   | Ningxia | NEC | 15 | 2 | 3  | 29 | 21 | 2  | 5  | 30  | 16 | 2 | 4  | 43  |
| Zhongwei   | Ningxia | NEC | 11 | 2 | 5  | 27 | 18 | 2  | 2  | 29  | 8  | 1 | 3  | 17  |

|           |          |     |    |   |    |    |    |   |    |    |    |   |    |    |
|-----------|----------|-----|----|---|----|----|----|---|----|----|----|---|----|----|
| Aksu      | Sinkiang | NEC | 6  | 1 | 1  | 13 | 5  | 1 | 2  | 15 | 5  | 1 | 1  | 28 |
| Hami      | Sinkiang | NEC | 6  | 1 | 1  | 16 | 5  | 1 | 1  | 14 | 5  | 1 | 1  | 13 |
| Hotan     | Sinkiang | NEC | 38 | 4 | 9  | 74 | 27 | 4 | 8  | 55 | 31 | 3 | 8  | 69 |
| Kashgar   | Sinkiang | NEC | 10 | 1 | 5  | 16 | 9  | 1 | 6  | 14 | 12 | 1 | 6  | 26 |
| Karamay   | Sinkiang | NEC | 7  | 0 | 4  | 11 | 9  | 1 | 4  | 20 | 7  | 0 | 5  | 11 |
| Kizilsu   | Sinkiang | NEC | 5  | 2 | 0  | 27 | 6  | 1 | 2  | 16 | 2  | 0 | 1  | 4  |
| Shihezi   | Sinkiang | NEC | 9  | 1 | 2  | 25 | 8  | 1 | 2  | 14 | 9  | 1 | 3  | 18 |
| Urumchi   | Sinkiang | NEC | 10 | 1 | 2  | 18 | 9  | 1 | 2  | 15 | 10 | 1 | 3  | 23 |
| Wujiaqu   | Sinkiang | NEC | 9  | 3 | 1  | 56 | 13 | 3 | 4  | 44 | 7  | 1 | 2  | 21 |
| Yili      | Sinkiang | NEC | 7  | 0 | 4  | 9  | 7  | 0 | 4  | 10 | 7  | 1 | 2  | 20 |
| Ezhou     | Hubei    | NEC | 16 | 2 | 5  | 34 | 15 | 1 | 9  | 25 | 21 | 2 | 6  | 43 |
| Huanggang | Hubei    | NEC | 10 | 2 | 1  | 29 | 7  | 1 | 3  | 15 | 18 | 3 | 2  | 50 |
| Jingmen   | Hubei    | NEC | 14 | 1 | 7  | 27 | 17 | 1 | 10 | 21 | 19 | 2 | 6  | 51 |
| Shiyan    | Hubei    | NEC | 18 | 1 | 10 | 23 | 22 | 1 | 15 | 33 | 18 | 1 | 10 | 29 |
| Wuhan     | Hubei    | NEC | 12 | 1 | 8  | 18 | 14 | 1 | 9  | 18 | 17 | 1 | 11 | 29 |
| Xianning  | Hubei    | NEC | 14 | 1 | 9  | 22 | 14 | 1 | 10 | 19 | 12 | 1 | 5  | 22 |
| Xiangyang | Hubei    | NEC | 10 | 1 | 3  | 20 | 12 | 1 | 7  | 18 | 14 | 1 | 6  | 32 |
| Xiaogan   | Hubei    | NEC | 5  | 1 | 1  | 23 | 6  | 1 | 2  | 19 | 6  | 1 | 0  | 14 |
| Yichang   | Hubei    | NEC | 9  | 1 | 5  | 24 | 11 | 1 | 8  | 19 | 10 | 0 | 6  | 15 |
| Anqing    | Anhui    | NEC | 14 | 1 | 10 | 18 | 15 | 0 | 13 | 17 | 18 | 1 | 11 | 35 |
| Bengbu    | Anhui    | NEC | 14 | 1 | 5  | 23 | 18 | 1 | 14 | 23 | 22 | 1 | 13 | 34 |
| Bozhou    | Anhui    | NEC | 40 | 2 | 27 | 59 | 40 | 3 | 15 | 61 | 34 | 2 | 14 | 59 |
| Chuzhou   | Anhui    | NEC | 16 | 1 | 12 | 22 | 12 | 1 | 6  | 18 | 11 | 1 | 6  | 18 |
| Fuyang    | Anhui    | NEC | 16 | 1 | 13 | 23 | 19 | 1 | 14 | 34 | 20 | 1 | 15 | 27 |
| Hefei     | Anhui    | NEC | 8  | 1 | 6  | 14 | 7  | 0 | 4  | 9  | 9  | 1 | 5  | 14 |
| Huaibei   | Anhui    | NEC | 28 | 2 | 18 | 48 | 25 | 1 | 16 | 34 | 27 | 3 | 14 | 73 |

|             |              |     |    |   |    |    |    |   |    |    |    |   |    |    |
|-------------|--------------|-----|----|---|----|----|----|---|----|----|----|---|----|----|
| Huainan     | Anhui        | NEC | 9  | 1 | 5  | 16 | 9  | 0 | 6  | 12 | 11 | 0 | 6  | 15 |
| Huangshan   | Anhui        | NEC | 7  | 0 | 5  | 8  | 8  | 0 | 7  | 9  | 8  | 0 | 7  | 11 |
| Lu'an       | Anhui        | NEC | 21 | 5 | 5  | 68 | 10 | 0 | 9  | 13 | 12 | 0 | 9  | 16 |
| Ma'anshan   | Anhui        | NEC | 14 | 2 | 5  | 31 | 19 | 2 | 11 | 29 | 14 | 2 | 5  | 41 |
| Suzhou      | Anhui        | NEC | 9  | 1 | 5  | 14 | 11 | 1 | 7  | 18 | 14 | 1 | 9  | 22 |
| Tongling    | Anhui        | NEC | 29 | 3 | 10 | 69 | 36 | 3 | 18 | 64 | 28 | 1 | 12 | 42 |
| Wuhu        | Anhui        | NEC | 22 | 1 | 17 | 31 | 18 | 1 | 14 | 24 | 19 | 1 | 14 | 28 |
| Changzhou   | Jiangsu      | NEC | 22 | 2 | 10 | 36 | 23 | 2 | 10 | 36 | 24 | 2 | 12 | 47 |
| Huaian      | Jiangsu      | NEC | 20 | 2 | 8  | 41 | 13 | 1 | 8  | 18 | 14 | 1 | 5  | 27 |
| Lianyungang | Jiangsu      | NEC | 12 | 1 | 5  | 21 | 19 | 1 | 12 | 27 | 22 | 1 | 10 | 36 |
| Nanjing     | Jiangsu      | NEC | 14 | 2 | 5  | 26 | 12 | 1 | 7  | 18 | 14 | 1 | 8  | 25 |
| Nantong     | Jiangsu      | NEC | 25 | 2 | 12 | 43 | 25 | 3 | 9  | 46 | 23 | 1 | 14 | 44 |
| Suzhou      | Jiangsu      | NEC | 14 | 1 | 6  | 21 | 18 | 2 | 9  | 39 | 17 | 1 | 8  | 29 |
| Suqian      | Jiangsu      | NEC | 12 | 2 | 3  | 35 | 15 | 1 | 5  | 24 | 16 | 1 | 5  | 28 |
| Taizhou     | Jiangsu      | NEC | 17 | 1 | 11 | 28 | 18 | 1 | 12 | 24 | 19 | 1 | 12 | 29 |
| Wuxi        | Jiangsu      | NEC | 19 | 1 | 11 | 29 | 24 | 1 | 16 | 36 | 27 | 1 | 14 | 41 |
| Xuzhou      | Jiangsu      | NEC | 26 | 1 | 20 | 41 | 34 | 3 | 18 | 57 | 29 | 2 | 17 | 52 |
| Yanchen     | Jiangsu      | NEC | 14 | 2 | 5  | 27 | 14 | 1 | 10 | 18 | 17 | 1 | 7  | 26 |
| Yangzhou    | Jiangsu      | NEC | 25 | 3 | 8  | 58 | 19 | 1 | 13 | 23 | 17 | 1 | 8  | 28 |
| Zhenjiang   | Jiangsu      | NEC | 22 | 2 | 10 | 35 | 19 | 1 | 10 | 25 | 20 | 2 | 10 | 41 |
| Shanghai    | Municipality | NEC | 11 | 1 | 6  | 17 | 13 | 1 | 8  | 24 | 11 | 1 | 7  | 18 |
| Hangzhou    | Zhejiang     | NEC | 11 | 1 | 6  | 17 | 11 | 1 | 7  | 19 | 14 | 1 | 7  | 20 |
| Huzhou      | Zhejiang     | NEC | 10 | 1 | 4  | 18 | 14 | 2 | 4  | 31 | 12 | 1 | 4  | 20 |
| Jiaxing     | Zhejiang     | NEC | 11 | 1 | 3  | 19 | 18 | 2 | 8  | 34 | 16 | 1 | 3  | 32 |
| Jinhua      | Zhejiang     | NEC | 15 | 2 | 3  | 32 | 16 | 1 | 9  | 26 | 18 | 1 | 8  | 37 |
| Lishui      | Zhejiang     | NEC | 6  | 1 | 1  | 12 | 10 | 1 | 2  | 21 | 7  | 1 | 2  | 22 |

|             |          |     |    |   |    |    |    |   |    |    |    |   |    |    |
|-------------|----------|-----|----|---|----|----|----|---|----|----|----|---|----|----|
| Ningbo      | Zhejiang | NEC | 10 | 1 | 6  | 16 | 13 | 1 | 9  | 20 | 14 | 1 | 7  | 20 |
| Quzhou      | Zhejiang | NEC | 15 | 2 | 3  | 32 | 18 | 2 | 9  | 34 | 17 | 1 | 8  | 28 |
| Shaoxing    | Zhejiang | NEC | 13 | 1 | 6  | 24 | 23 | 2 | 14 | 37 | 28 | 2 | 14 | 43 |
| Taizhou     | Zhejiang | NEC | 6  | 1 | 1  | 11 | 6  | 1 | 3  | 11 | 7  | 0 | 3  | 12 |
| Wenjiang    | Zhejiang | NEC | 8  | 1 | 2  | 12 | 9  | 1 | 5  | 13 | 8  | 1 | 2  | 13 |
| Zhoushan    | Zhejiang | NEC | 5  | 1 | 2  | 15 | 6  | 0 | 3  | 9  | 7  | 0 | 5  | 14 |
| Fuzhou      | Jiangxi  | NEC | 14 | 1 | 3  | 23 | 18 | 3 | 6  | 37 | 18 | 2 | 7  | 40 |
| Ganzhou     | Jiangxi  | NEC | 17 | 2 | 10 | 33 | 20 | 2 | 10 | 37 | 26 | 2 | 13 | 48 |
| Ji'an       | Jiangxi  | NEC | 23 | 3 | 8  | 43 | 24 | 2 | 11 | 40 | 30 | 2 | 6  | 47 |
| Jingdezhen  | Jiangxi  | NEC | 7  | 1 | 2  | 17 | 10 | 1 | 2  | 20 | 8  | 0 | 4  | 12 |
| Jiujiang    | Jiangxi  | NEC | 40 | 1 | 27 | 52 | 39 | 2 | 29 | 49 | 37 | 1 | 26 | 48 |
| Nanchang    | Jiangxi  | NEC | 26 | 2 | 12 | 50 | 26 | 1 | 20 | 33 | 24 | 1 | 8  | 34 |
| Pingxiang   | Jiangxi  | NEC | 20 | 2 | 12 | 47 | 25 | 2 | 14 | 33 | 22 | 2 | 10 | 40 |
| Shangrao    | Jiangxi  | NEC | 44 | 4 | 10 | 72 | 44 | 5 | 20 | 99 | 33 | 2 | 14 | 54 |
| Xinyu       | Jiangxi  | NEC | 25 | 3 | 5  | 53 | 22 | 2 | 8  | 30 | 19 | 1 | 6  | 30 |
| Yichun      | Jiangxi  | NEC | 11 | 1 | 5  | 21 | 15 | 1 | 9  | 19 | 17 | 1 | 8  | 36 |
| Yingtian    | Jiangxi  | NEC | 21 | 2 | 13 | 41 | 26 | 3 | 15 | 48 | 37 | 3 | 14 | 85 |
| Changsha    | Hunan    | NEC | 14 | 1 | 8  | 20 | 14 | 1 | 7  | 20 | 13 | 1 | 4  | 24 |
| Changde     | Hunan    | NEC | 17 | 1 | 6  | 22 | 14 | 1 | 10 | 20 | 14 | 1 | 5  | 20 |
| Chenzhou    | Hunan    | NEC | 11 | 1 | 7  | 19 | 17 | 2 | 9  | 35 | 17 | 1 | 8  | 30 |
| Huaihua     | Hunan    | NEC | 11 | 1 | 4  | 24 | 13 | 1 | 6  | 22 | 13 | 1 | 3  | 29 |
| Loudi       | Hunan    | NEC | 29 | 1 | 16 | 37 | 33 | 1 | 26 | 42 | 29 | 1 | 15 | 40 |
| Xiangtan    | Hunan    | NEC | 14 | 1 | 6  | 22 | 16 | 1 | 9  | 29 | 20 | 2 | 7  | 44 |
| Yiyang      | Hunan    | NEC | 17 | 1 | 8  | 25 | 23 | 1 | 17 | 31 | 24 | 1 | 13 | 39 |
| Yongzhou    | Hunan    | NEC | 39 | 2 | 17 | 57 | 27 | 2 | 9  | 41 | 31 | 2 | 12 | 51 |
| Zhangjiajie | Hunan    | NEC | 6  | 0 | 4  | 9  | 6  | 0 | 4  | 7  | 6  | 0 | 2  | 9  |

|           |           |     |    |   |    |    |    |   |    |    |    |   |    |    |
|-----------|-----------|-----|----|---|----|----|----|---|----|----|----|---|----|----|
| Zhuzhou   | Hunan     | NEC | 17 | 2 | 8  | 36 | 18 | 1 | 7  | 27 | 19 | 1 | 10 | 28 |
| Dongguan  | Guangdong | NEC | 11 | 1 | 6  | 19 | 11 | 1 | 7  | 17 | 13 | 1 | 7  | 20 |
| Foshan    | Guangdong | NEC | 16 | 1 | 11 | 22 | 17 | 1 | 9  | 26 | 14 | 1 | 7  | 21 |
| Guangzhou | Guangdong | NEC | 12 | 0 | 8  | 17 | 11 | 1 | 6  | 17 | 10 | 1 | 5  | 16 |
| Heyuan    | Guangdong | NEC | 7  | 0 | 4  | 12 | 7  | 1 | 3  | 13 | 8  | 0 | 4  | 13 |
| Huizhou   | Guangdong | NEC | 10 | 1 | 7  | 14 | 9  | 1 | 7  | 16 | 9  | 0 | 6  | 15 |
| Jiangmen  | Guangdong | NEC | 12 | 1 | 9  | 17 | 18 | 1 | 8  | 28 | 15 | 1 | 10 | 24 |
| Maoming   | Guangdong | NEC | 12 | 2 | 5  | 33 | 16 | 2 | 9  | 30 | 10 | 1 | 2  | 20 |
| Meizhou   | Guangdong | NEC | 7  | 0 | 5  | 9  | 6  | 0 | 4  | 8  | 8  | 0 | 5  | 11 |
| Qingyuan  | Guangdong | NEC | 18 | 1 | 12 | 25 | 10 | 1 | 5  | 15 | 12 | 1 | 6  | 22 |
| Shantou   | Guangdong | NEC | 14 | 1 | 9  | 18 | 13 | 1 | 8  | 18 | 12 | 1 | 8  | 23 |
| Shaoguan  | Guangdong | NEC | 19 | 1 | 11 | 28 | 16 | 1 | 9  | 24 | 16 | 1 | 7  | 24 |
| Shenzhen  | Guangdong | NEC | 9  | 0 | 6  | 13 | 8  | 1 | 6  | 12 | 7  | 0 | 5  | 13 |
| Zhanjiang | Guangdong | NEC | 9  | 1 | 5  | 14 | 6  | 1 | 2  | 9  | 5  | 1 | 1  | 10 |
| Zhaoqing  | Guangdong | NEC | 19 | 1 | 10 | 28 | 17 | 2 | 9  | 28 | 21 | 1 | 12 | 34 |
| Zhongshan | Guangdong | NEC | 7  | 1 | 4  | 17 | 8  | 1 | 4  | 17 | 9  | 1 | 4  | 19 |
| Zhuhai    | Guangdong | NEC | 5  | 1 | 2  | 14 | 8  | 1 | 3  | 15 | 7  | 1 | 3  | 17 |
| Fuzhou    | Fujian    | NEC | 5  | 0 | 3  | 6  | 4  | 0 | 3  | 6  | 4  | 0 | 2  | 5  |
| Longyan   | Fujian    | NEC | 7  | 1 | 3  | 12 | 6  | 0 | 4  | 9  | 9  | 1 | 5  | 16 |
| Nanping   | Fujian    | NEC | 12 | 0 | 8  | 15 | 15 | 1 | 11 | 21 | 15 | 1 | 11 | 27 |
| Ningde    | Fujian    | NEC | 2  | 0 | 1  | 5  | 3  | 0 | 1  | 5  | 3  | 0 | 1  | 7  |
| Putian    | Fujian    | NEC | 5  | 1 | 2  | 11 | 4  | 0 | 2  | 7  | 5  | 0 | 3  | 8  |
| Quanzhou  | Fujian    | NEC | 13 | 1 | 3  | 25 | 9  | 1 | 6  | 17 | 9  | 1 | 4  | 24 |
| Sanming   | Fujian    | NEC | 13 | 1 | 4  | 19 | 10 | 1 | 4  | 19 | 12 | 1 | 6  | 23 |
| Xiamen    | Fujian    | NEC | 9  | 1 | 3  | 16 | 6  | 1 | 2  | 12 | 6  | 0 | 2  | 9  |
| Zhangzhou | Fujian    | NEC | 9  | 1 | 5  | 16 | 11 | 1 | 7  | 19 | 11 | 1 | 5  | 17 |

|           |              |     |    |   |    |    |    |   |    |    |    |   |    |    |
|-----------|--------------|-----|----|---|----|----|----|---|----|----|----|---|----|----|
| Haikou    | Hainan       | NEC | 5  | 0 | 3  | 10 | 5  | 0 | 3  | 8  | 4  | 0 | 2  | 8  |
| Sanya     | Hainan       | NEC | 3  | 0 | 2  | 7  | 2  | 0 | 2  | 3  | 3  | 0 | 2  | 4  |
| Chongqing | Municipality | NEC | 10 | 1 | 4  | 16 | 12 | 1 | 7  | 16 | 10 | 1 | 4  | 23 |
| Bazhong   | Sichuan      | NEC | 2  | 0 | 1  | 5  | 2  | 0 | 1  | 5  | 2  | 0 | 1  | 4  |
| Chengdu   | Sichuan      | NEC | 13 | 1 | 7  | 20 | 15 | 1 | 7  | 24 | 12 | 1 | 6  | 25 |
| Dazhou    | Sichuan      | NEC | 15 | 1 | 6  | 31 | 12 | 1 | 7  | 19 | 10 | 1 | 4  | 26 |
| Deyang    | Sichuan      | NEC | 17 | 1 | 7  | 30 | 14 | 1 | 4  | 23 | 8  | 1 | 2  | 22 |
| Guangyuan | Sichuan      | NEC | 17 | 1 | 12 | 22 | 16 | 1 | 13 | 23 | 12 | 0 | 7  | 17 |
| Leshan    | Sichuan      | NEC | 14 | 1 | 6  | 25 | 19 | 3 | 6  | 38 | 13 | 1 | 6  | 27 |
| Luzhou    | Sichuan      | NEC | 12 | 1 | 6  | 20 | 15 | 2 | 6  | 27 | 11 | 1 | 5  | 19 |
| Meishan   | Sichuan      | NEC | 15 | 1 | 8  | 26 | 13 | 2 | 2  | 30 | 8  | 1 | 2  | 20 |
| Mianyang  | Sichuan      | NEC | 10 | 1 | 4  | 21 | 11 | 1 | 5  | 18 | 10 | 1 | 5  | 23 |
| Nanchong  | Sichuan      | NEC | 12 | 1 | 5  | 18 | 10 | 1 | 5  | 22 | 9  | 1 | 5  | 22 |
| Panzhihua | Sichuan      | NEC | 23 | 2 | 12 | 44 | 30 | 2 | 19 | 44 | 35 | 2 | 16 | 76 |
| Suining   | Sichuan      | NEC | 10 | 1 | 3  | 19 | 7  | 1 | 4  | 17 | 7  | 1 | 3  | 17 |
| Ya'an     | Sichuan      | NEC | 14 | 2 | 6  | 56 | 8  | 0 | 6  | 10 | 10 | 0 | 6  | 14 |
| Ziyang    | Sichuan      | NEC | 21 | 2 | 12 | 36 | 22 | 1 | 17 | 30 | 16 | 1 | 9  | 28 |
| Zigong    | Sichuan      | NEC | 16 | 1 | 9  | 27 | 19 | 1 | 11 | 27 | 17 | 1 | 10 | 31 |
| Baoshan   | Yunnan       | NEC | 12 | 1 | 2  | 22 | 5  | 1 | 1  | 10 | 9  | 1 | 3  | 24 |
| Chuxiong  | Yunnan       | NEC | 23 | 2 | 12 | 42 | 27 | 3 | 12 | 56 | 19 | 2 | 10 | 44 |
| Dali      | Yunnan       | NEC | 6  | 0 | 4  | 9  | 6  | 1 | 3  | 10 | 5  | 0 | 3  | 7  |
| Dehong    | Yunnan       | NEC | 20 | 2 | 6  | 32 | 12 | 2 | 2  | 19 | 15 | 1 | 5  | 32 |
| Honghe    | Yunnan       | NEC | 19 | 4 | 4  | 66 | 31 | 7 | 9  | 97 | 22 | 4 | 6  | 96 |
| Kunming   | Yunnan       | NEC | 13 | 1 | 6  | 20 | 16 | 2 | 7  | 38 | 12 | 1 | 7  | 22 |
| Lijiang   | Yunnan       | NEC | 11 | 1 | 5  | 17 | 8  | 0 | 6  | 11 | 8  | 0 | 3  | 12 |
| Lincang   | Yunnan       | NEC | 17 | 3 | 4  | 50 | 18 | 3 | 3  | 43 | 22 | 2 | 11 | 48 |

|               |         |     |    |   |    |    |    |   |    |     |    |   |    |     |
|---------------|---------|-----|----|---|----|----|----|---|----|-----|----|---|----|-----|
| Nujiang       | Yunnan  | NEC | 8  | 1 | 4  | 13 | 7  | 0 | 5  | 9   | 7  | 1 | 3  | 16  |
| Qujing        | Yunnan  | NEC | 20 | 2 | 9  | 35 | 24 | 2 | 17 | 37  | 17 | 1 | 10 | 33  |
| Wenshan       | Yunnan  | NEC | 10 | 1 | 3  | 23 | 8  | 1 | 4  | 14  | 7  | 1 | 2  | 20  |
| Xishuangbanna | Yunnan  | NEC | 10 | 1 | 6  | 19 | 8  | 0 | 6  | 10  | 8  | 0 | 2  | 12  |
| Tuxi          | Yunnan  | NEC | 13 | 1 | 6  | 18 | 17 | 1 | 9  | 26  | 13 | 1 | 9  | 23  |
| Zhaotong      | Yunnan  | NEC | 32 | 5 | 4  | 60 | 47 | 7 | 15 | 103 | 27 | 2 | 11 | 52  |
| Anshun        | Guizhou | NEC | 25 | 2 | 13 | 51 | 32 | 4 | 18 | 69  | 20 | 2 | 11 | 43  |
| Bijie         | Guizhou | NEC | 10 | 1 | 3  | 17 | 11 | 1 | 7  | 16  | 10 | 0 | 4  | 15  |
| Guiyang       | Guizhou | NEC | 7  | 0 | 5  | 13 | 8  | 1 | 4  | 12  | 7  | 0 | 5  | 12  |
| Liupanshui    | Guizhou | NEC | 10 | 1 | 6  | 19 | 13 | 1 | 7  | 22  | 11 | 1 | 6  | 18  |
| Tongren       | Guizhou | NEC | 7  | 1 | 3  | 16 | 8  | 1 | 5  | 16  | 7  | 0 | 3  | 10  |
| Zunyi         | Guizhou | NEC | 7  | 1 | 2  | 15 | 6  | 1 | 2  | 9   | 6  | 0 | 2  | 10  |
| Baise         | Guangxi | NEC | 10 | 1 | 5  | 18 | 7  | 0 | 5  | 10  | 12 | 1 | 5  | 18  |
| Beihai        | Guangxi | NEC | 8  | 1 | 5  | 16 | 9  | 1 | 6  | 14  | 9  | 0 | 6  | 15  |
| Chongzuo      | Guangxi | NEC | 8  | 1 | 5  | 14 | 14 | 2 | 5  | 24  | 10 | 1 | 4  | 21  |
| Fangchenggang | Guangxi | NEC | 4  | 0 | 2  | 7  | 3  | 0 | 2  | 6   | 4  | 0 | 2  | 8   |
| Guigang       | Guangxi | NEC | 22 | 2 | 6  | 42 | 17 | 2 | 7  | 30  | 18 | 1 | 10 | 28  |
| Guilin        | Guangxi | NEC | 18 | 2 | 9  | 32 | 19 | 2 | 10 | 32  | 22 | 1 | 10 | 39  |
| Hechi         | Guangxi | NEC | 33 | 5 | 9  | 77 | 31 | 4 | 5  | 57  | 21 | 3 | 6  | 69  |
| Hezhou        | Guangxi | NEC | 15 | 1 | 11 | 22 | 20 | 1 | 13 | 30  | 16 | 1 | 8  | 23  |
| Laibin        | Guangxi | NEC | 25 | 4 | 6  | 68 | 14 | 2 | 5  | 32  | 20 | 2 | 7  | 54  |
| Liuzhou       | Guangxi | NEC | 20 | 2 | 10 | 36 | 26 | 2 | 12 | 37  | 24 | 2 | 10 | 41  |
| Nanning       | Guangxi | NEC | 11 | 1 | 8  | 18 | 13 | 1 | 8  | 21  | 11 | 0 | 8  | 17  |
| Qinzhou       | Guangxi | NEC | 13 | 1 | 8  | 18 | 14 | 1 | 8  | 21  | 14 | 1 | 9  | 24  |
| Wuzhou        | Guangxi | NEC | 16 | 1 | 9  | 22 | 15 | 1 | 7  | 23  | 13 | 1 | 8  | 23  |
| Yulin         | Guangxi | NEC | 15 | 2 | 6  | 36 | 15 | 2 | 6  | 34  | 22 | 4 | 4  | 107 |



|          |         |     |    |   |    |    |    |   |    |    |    |   |    |    |
|----------|---------|-----|----|---|----|----|----|---|----|----|----|---|----|----|
| Golog    | Qinghai | NEC | 23 | 1 | 18 | 26 | 16 | 1 | 12 | 26 | 25 | 1 | 15 | 33 |
| Haidong  | Qinghai | NEC | 21 | 2 | 7  | 44 | 34 | 2 | 25 | 51 | 33 | 3 | 13 | 69 |
| Xining   | Qinghai | NEC | 17 | 2 | 7  | 38 | 26 | 2 | 9  | 37 | 18 | 2 | 5  | 36 |
| Ali      | Tibet   | NEC | 13 | 0 | 7  | 15 | 9  | 0 | 8  | 11 | 8  | 0 | 2  | 11 |
| Qamdo    | Tibet   | NEC | 4  | 0 | 3  | 5  | 4  | 0 | 3  | 4  | 5  | 0 | 4  | 7  |
| Lhasa    | Tibet   | NEC | 7  | 0 | 5  | 9  | 7  | 0 | 5  | 9  | 10 | 0 | 8  | 14 |
| Nyingchi | Tibet   | NEC | 3  | 0 | 2  | 3  | 3  | 0 | 3  | 3  | 3  | 0 | 3  | 4  |
| Naqu     | Tibet   | NEC | 25 | 0 | 21 | 29 | 27 | 0 | 24 | 30 | 26 | 1 | 20 | 31 |
| Shigatse | Tibet   | NEC | 6  | 0 | 3  | 7  | 6  | 0 | 6  | 7  | 6  | 0 | 3  | 7  |
| Lhoka    | Tibet   | NEC | 4  | 0 | 3  | 5  | 3  | 0 | 3  | 4  | 3  | 0 | 3  | 5  |

160 <sup>a</sup> EC and NEC denote emission control and non-emission control regions, respectively, of which the latter means regions without implementation  
161 of emission control measures.

162 <sup>b</sup> The pre-Parade Blue, Parade Blue, and post-Parade Blue periods indicate the periods of 1-19 August, 20 August-3 September, and 4-30  
163 September 2015, respectively.

164

165

166

167

168

169

170

171

172 **Table S6.** Summary of daily average CO concentrations (mg m<sup>-3</sup>) during the pre-Parade Blue, Parade Blue and post-Parade Blue periods in the  
 173 291 cities across China.

| City         | Province     | Region <sup>a</sup> | Pre-Parade Blue period <sup>b</sup> |      |      |      | Parade Blue period <sup>b</sup> |      |      |      | Post-Parade Blue period <sup>b</sup> |      |      |      |
|--------------|--------------|---------------------|-------------------------------------|------|------|------|---------------------------------|------|------|------|--------------------------------------|------|------|------|
|              |              |                     | Mean                                | SE   | Min  | Max  | Mean                            | SE   | Min  | Max  | Mean                                 | SE   | Min  | Max  |
| Beijing      | Municipality | EC                  | 0.90                                | 0.06 | 0.51 | 1.42 | 0.56                            | 0.04 | 0.43 | 0.94 | 0.84                                 | 0.06 | 0.35 | 1.48 |
| Tianjing     | Municipality | EC                  | 0.97                                | 0.05 | 0.67 | 1.40 | 1.04                            | 0.08 | 0.61 | 1.79 | 0.89                                 | 0.06 | 0.39 | 1.88 |
| Baoding      | Hebei        | EC                  | 1.01                                | 0.07 | 0.51 | 1.74 | 0.64                            | 0.05 | 0.34 | 1.08 | 0.81                                 | 0.06 | 0.26 | 1.39 |
| Cangzhou     | Hebei        | EC                  | 0.90                                | 0.06 | 0.51 | 1.42 | 0.56                            | 0.04 | 0.43 | 0.94 | 0.94                                 | 0.07 | 0.39 | 1.98 |
| Chengde      | Hebei        | EC                  | 0.78                                | 0.04 | 0.48 | 1.04 | 0.49                            | 0.02 | 0.38 | 0.75 | 0.65                                 | 0.05 | 0.30 | 1.25 |
| Handan       | Hebei        | EC                  | 0.99                                | 0.07 | 0.48 | 1.51 | 1.51                            | 0.23 | 0.67 | 3.55 | 1.20                                 | 0.13 | 0.58 | 3.63 |
| Hengshui     | Hebei        | EC                  | 1.09                                | 0.03 | 0.85 | 1.33 | 1.00                            | 0.04 | 0.74 | 1.36 | 1.37                                 | 0.06 | 0.78 | 1.96 |
| Langfang     | Hebei        | EC                  | 1.13                                | 0.08 | 0.65 | 1.92 | 0.79                            | 0.10 | 0.38 | 1.81 | 1.08                                 | 0.08 | 0.25 | 1.74 |
| Qinhuangdao  | Hebei        | EC                  | 1.38                                | 0.15 | 0.38 | 2.46 | 0.63                            | 0.10 | 0.36 | 1.87 | 1.16                                 | 0.13 | 0.35 | 2.45 |
| Shijiazhuang | Hebei        | EC                  | 0.66                                | 0.05 | 0.36 | 1.17 | 0.57                            | 0.05 | 0.24 | 0.95 | 1.03                                 | 0.08 | 0.40 | 1.96 |
| Tangshan     | Hebei        | EC                  | 1.81                                | 0.21 | 0.84 | 4.53 | 1.89                            | 0.23 | 0.59 | 3.91 | 1.99                                 | 0.19 | 0.49 | 4.76 |
| Xingtai      | Hebei        | EC                  | 1.12                                | 0.12 | 0.51 | 2.40 | 0.93                            | 0.11 | 0.33 | 1.70 | 1.27                                 | 0.09 | 0.49 | 2.17 |
| Zhangjiakou  | Hebei        | EC                  | 0.51                                | 0.02 | 0.37 | 0.66 | 0.45                            | 0.02 | 0.37 | 0.58 | 0.63                                 | 0.03 | 0.33 | 1.03 |
| Changzhi     | Shanxi       | EC                  | 1.42                                | 0.08 | 1.01 | 2.06 | 1.57                            | 0.04 | 1.30 | 1.79 | 1.57                                 | 0.05 | 1.18 | 2.44 |
| Datong       | Shanxi       | EC                  | 0.79                                | 0.01 | 0.69 | 0.88 | 0.87                            | 0.02 | 0.77 | 1.00 | 1.14                                 | 0.04 | 0.79 | 1.49 |
| Jincheng     | Shanxi       | EC                  | 1.71                                | 0.19 | 0.59 | 3.97 | 1.64                            | 0.15 | 0.78 | 2.83 | 1.25                                 | 0.08 | 0.67 | 2.64 |
| Jinzhong     | Shanxi       | EC                  | 0.88                                | 0.05 | 0.61 | 1.31 | 0.59                            | 0.03 | 0.36 | 0.82 | 1.03                                 | 0.05 | 0.42 | 1.45 |
| Linfen       | Shanxi       | EC                  | 1.59                                | 0.07 | 1.13 | 2.32 | 1.64                            | 0.04 | 1.34 | 1.94 | 2.07                                 | 0.05 | 1.45 | 2.66 |
| Lvliang      | Shanxi       | EC                  | 1.73                                | 0.04 | 1.47 | 2.13 | 1.85                            | 0.03 | 1.63 | 2.00 | 2.48                                 | 0.05 | 1.97 | 2.90 |
| Shuozhou     | Shanxi       | EC                  | 1.26                                | 0.04 | 0.84 | 1.51 | 1.11                            | 0.02 | 1.01 | 1.27 | 1.24                                 | 0.04 | 0.88 | 1.76 |
| Taiyuan      | Shanxi       | EC                  | 0.85                                | 0.03 | 0.68 | 1.15 | 0.84                            | 0.03 | 0.71 | 1.08 | 1.17                                 | 0.03 | 0.71 | 1.51 |

|             |                |    |      |      |      |      |      |      |      |      |      |      |      |      |
|-------------|----------------|----|------|------|------|------|------|------|------|------|------|------|------|------|
| Xinzhou     | Shanxi         | EC | 1.00 | 0.03 | 0.70 | 1.31 | 1.84 | 0.43 | 0.84 | 7.71 | 1.21 | 0.05 | 0.82 | 1.73 |
| Yangquan    | Shanxi         | EC | 0.85 | 0.03 | 0.67 | 1.14 | 0.63 | 0.02 | 0.52 | 0.85 | 0.95 | 0.05 | 0.34 | 1.50 |
| Yuncheng    | Shanxi         | EC | 2.11 | 0.05 | 1.77 | 2.49 | 2.30 | 0.15 | 1.02 | 3.17 | 1.61 | 0.06 | 1.16 | 2.31 |
| Binzhou     | Shandong       | EC | 1.71 | 0.08 | 1.17 | 2.32 | 1.45 | 0.07 | 1.12 | 2.24 | 1.46 | 0.06 | 0.88 | 2.29 |
| Dezhou      | Shandong       | EC | 1.92 | 0.05 | 1.62 | 2.34 | 1.66 | 0.06 | 1.32 | 2.08 | 1.76 | 0.08 | 1.11 | 2.65 |
| Dongying    | Shandong       | EC | 1.00 | 0.07 | 0.61 | 1.50 | 0.87 | 0.05 | 0.60 | 1.12 | 0.94 | 0.05 | 0.50 | 1.31 |
| Jinan       | Shandong       | EC | 0.92 | 0.05 | 0.57 | 1.33 | 0.97 | 0.04 | 0.76 | 1.25 | 1.16 | 0.06 | 0.50 | 1.66 |
| Jining      | Shandong       | EC | 0.99 | 0.04 | 0.72 | 1.26 | 0.92 | 0.04 | 0.70 | 1.19 | 0.97 | 0.05 | 0.59 | 1.50 |
| Laiwu       | Shandong       | EC | 1.28 | 0.06 | 0.91 | 1.60 | 1.47 | 0.06 | 1.09 | 1.85 | 1.28 | 0.06 | 0.70 | 1.95 |
| Liaocheng   | Shandong       | EC | 1.39 | 0.04 | 1.16 | 1.72 | 1.18 | 0.05 | 0.86 | 1.50 | 1.50 | 0.06 | 0.92 | 2.30 |
| Linyi       | Shandong       | EC | 1.09 | 0.06 | 0.75 | 1.85 | 1.17 | 0.05 | 0.86 | 1.49 | 1.17 | 0.07 | 0.52 | 2.13 |
| Qingdao     | Shandong       | EC | 0.62 | 0.04 | 0.33 | 0.99 | 0.63 | 0.03 | 0.48 | 0.91 | 0.61 | 0.03 | 0.41 | 1.07 |
| Rizhao      | Shandong       | EC | 0.81 | 0.05 | 0.49 | 1.37 | 0.95 | 0.04 | 0.72 | 1.26 | 0.98 | 0.05 | 0.61 | 1.74 |
| Tai'an      | Shandong       | EC | 1.45 | 0.08 | 1.13 | 2.56 | 1.24 | 0.06 | 0.86 | 1.62 | 1.09 | 0.05 | 0.65 | 1.53 |
| Weihai      | Shandong       | EC | 0.68 | 0.05 | 0.39 | 1.37 | 0.54 | 0.02 | 0.37 | 0.67 | 0.47 | 0.02 | 0.24 | 0.73 |
| Weifang     | Shandong       | EC | 0.71 | 0.06 | 0.34 | 1.19 | 0.87 | 0.07 | 0.58 | 1.35 | 0.88 | 0.06 | 0.40 | 1.65 |
| Yantai      | Shandong       | EC | 0.70 | 0.05 | 0.41 | 1.28 | 0.49 | 0.02 | 0.34 | 0.62 | 0.56 | 0.03 | 0.35 | 0.87 |
| Zaozhuang   | Shandong       | EC | 0.71 | 0.05 | 0.37 | 1.00 | 0.86 | 0.02 | 0.75 | 1.04 | 0.87 | 0.04 | 0.46 | 1.55 |
| Zibo        | Shandong       | EC | 1.91 | 0.09 | 1.41 | 2.63 | 2.11 | 0.10 | 1.53 | 2.78 | 1.89 | 0.09 | 1.18 | 3.10 |
| Alxa League | Inner Mongolia | EC | 0.71 | 0.04 | 0.43 | 1.05 | 0.75 | 0.04 | 0.57 | 1.07 | 0.69 | 0.02 | 0.52 | 0.93 |
| Bayannur    | Inner Mongolia | EC | 0.47 | 0.06 | 0.19 | 1.18 | 0.36 | 0.02 | 0.27 | 0.54 | 0.41 | 0.03 | 0.19 | 0.89 |
| Baotou      | Inner Mongolia | EC | 1.01 | 0.06 | 0.60 | 1.54 | 0.98 | 0.06 | 0.60 | 1.39 | 0.99 | 0.04 | 0.58 | 1.62 |
| Chifeng     | Inner Mongolia | EC | 0.86 | 0.09 | 0.35 | 1.51 | 0.54 | 0.03 | 0.39 | 0.78 | 0.67 | 0.05 | 0.34 | 1.42 |
| Ordos       | Inner Mongolia | EC | 0.60 | 0.03 | 0.40 | 0.88 | 0.61 | 0.01 | 0.48 | 0.72 | 0.66 | 0.03 | 0.43 | 1.01 |
| Hohhot      | Inner Mongolia | EC | 0.63 | 0.03 | 0.46 | 0.98 | 0.63 | 0.02 | 0.49 | 0.74 | 0.68 | 0.03 | 0.43 | 1.08 |
| Hulun Buir  | Inner Mongolia | EC | 0.31 | 0.03 | 0.15 | 0.58 | 0.21 | 0.03 | 0.05 | 0.42 | 0.23 | 0.03 | 0.08 | 0.87 |

|                |                |     |      |      |      |       |      |      |      |      |      |      |      |      |
|----------------|----------------|-----|------|------|------|-------|------|------|------|------|------|------|------|------|
| Tongliao       | Inner Mongolia | EC  | 0.75 | 0.05 | 0.52 | 1.21  | 0.51 | 0.01 | 0.40 | 0.65 | 0.57 | 0.04 | 0.26 | 1.07 |
| Wuhai          | Inner Mongolia | EC  | 0.70 | 0.06 | 0.31 | 1.20  | 0.64 | 0.06 | 0.37 | 1.04 | 0.80 | 0.06 | 0.24 | 1.42 |
| Hinggan League | Inner Mongolia | EC  | 0.69 | 0.04 | 0.51 | 1.31  | 0.49 | 0.02 | 0.40 | 0.66 | 0.57 | 0.03 | 0.40 | 1.12 |
| Anyang         | Henan          | EC  | 1.41 | 0.08 | 0.75 | 2.10  | 1.63 | 0.10 | 1.24 | 2.44 | 1.77 | 0.14 | 0.91 | 4.78 |
| Hebi           | Henan          | EC  | 0.99 | 0.06 | 0.66 | 1.54  | 1.18 | 0.14 | 0.52 | 2.25 | 1.25 | 0.07 | 0.47 | 1.93 |
| Jiaozuo        | Henan          | EC  | 1.50 | 0.05 | 1.14 | 1.79  | 1.38 | 0.09 | 0.90 | 2.00 | 1.40 | 0.05 | 0.87 | 2.13 |
| Kaifeng        | Henan          | EC  | 1.14 | 0.05 | 0.77 | 1.58  | 1.30 | 0.04 | 1.02 | 1.76 | 1.38 | 0.06 | 0.89 | 1.95 |
| Luoyang        | Henan          | EC  | 1.67 | 0.06 | 1.19 | 2.25  | 1.36 | 0.04 | 1.12 | 1.57 | 1.75 | 0.05 | 1.18 | 2.45 |
| Luohe          | Henan          | EC  | 0.66 | 0.04 | 0.46 | 1.00  | 0.74 | 0.03 | 0.53 | 1.00 | 0.81 | 0.04 | 0.49 | 1.42 |
| Nanyang        | Henan          | EC  | 0.69 | 0.06 | 0.31 | 1.22  | 0.70 | 0.02 | 0.57 | 0.90 | 1.03 | 0.05 | 0.68 | 1.71 |
| Pingdingshan   | Henan          | EC  | 0.90 | 0.04 | 0.56 | 1.10  | 0.87 | 0.04 | 0.64 | 1.13 | 1.02 | 0.04 | 0.65 | 1.61 |
| Sanmenxia      | Henan          | EC  | 1.05 | 0.03 | 0.76 | 1.27  | 1.13 | 0.02 | 0.97 | 1.28 | 1.15 | 0.03 | 0.81 | 1.40 |
| Shangqiu       | Henan          | EC  | 0.59 | 0.05 | 0.28 | 1.14  | 0.64 | 0.03 | 0.47 | 0.88 | 0.69 | 0.04 | 0.34 | 1.33 |
| Xinyang        | Henan          | EC  | 0.86 | 0.03 | 0.54 | 1.04  | 0.76 | 0.02 | 0.59 | 0.89 | 0.85 | 0.03 | 0.56 | 1.15 |
| Zhengzhou      | Henan          | EC  | 1.05 | 0.04 | 0.77 | 1.43  | 1.12 | 0.04 | 0.87 | 1.42 | 1.30 | 0.05 | 0.83 | 1.95 |
| Zhoukou        | Henan          | EC  | 1.02 | 0.05 | 0.77 | 1.47  | 1.35 | 0.04 | 1.06 | 1.55 | 1.27 | 0.05 | 0.76 | 1.66 |
| Zhumadian      | Henan          | EC  | 0.50 | 0.04 | 0.26 | 0.87  | 0.65 | 0.03 | 0.46 | 0.83 | 0.68 | 0.04 | 0.34 | 1.17 |
| Anshan         | Liaoning       | NEC | 1.43 | 0.06 | 0.97 | 1.99  | 1.32 | 0.06 | 0.97 | 1.67 | 1.18 | 0.06 | 0.74 | 2.01 |
| Benxi          | Liaoning       | NEC | 1.10 | 0.04 | 0.84 | 1.42  | 1.01 | 0.07 | 0.60 | 1.72 | 1.04 | 0.07 | 0.52 | 1.83 |
| Chaoyang       | Liaoning       | NEC | 1.71 | 0.06 | 1.43 | 2.31  | 1.52 | 0.01 | 1.42 | 1.62 | 1.80 | 0.07 | 1.27 | 2.77 |
| Dalian         | Liaoning       | NEC | 0.78 | 0.04 | 0.46 | 1.06  | 0.72 | 0.04 | 0.51 | 1.16 | 0.71 | 0.03 | 0.45 | 1.04 |
| Dandong        | Liaoning       | NEC | 7.13 | 1.59 | 0.97 | 24.00 | 1.26 | 0.03 | 1.06 | 1.40 | 1.34 | 0.02 | 1.12 | 1.59 |
| Fushun         | Liaoning       | NEC | 1.05 | 0.04 | 0.77 | 1.46  | 0.94 | 0.03 | 0.71 | 1.15 | 0.98 | 0.05 | 0.51 | 1.57 |
| Fuxin          | Liaoning       | NEC | 0.86 | 0.08 | 0.45 | 1.51  | 0.55 | 0.03 | 0.44 | 0.88 | 0.80 | 0.05 | 0.41 | 1.46 |
| Huludao        | Liaoning       | NEC | 1.26 | 0.11 | 0.55 | 1.89  | 0.90 | 0.07 | 0.60 | 1.80 | 1.12 | 0.08 | 0.65 | 2.06 |
| Jinzhou        | Liaoning       | NEC | 1.17 | 0.09 | 0.68 | 1.95  | 0.65 | 0.04 | 0.47 | 1.08 | 0.94 | 0.05 | 0.55 | 1.69 |

|              |              |     |      |      |      |      |      |      |      |      |      |      |      |      |
|--------------|--------------|-----|------|------|------|------|------|------|------|------|------|------|------|------|
| Liaoyang     | Liaoning     | NEC | 1.07 | 0.04 | 0.75 | 1.44 | 1.14 | 0.05 | 0.89 | 1.59 | 1.06 | 0.06 | 0.54 | 1.50 |
| Panjin       | Liaoning     | NEC | 0.89 | 0.06 | 0.50 | 1.47 | 0.68 | 0.04 | 0.54 | 1.18 | 0.79 | 0.04 | 0.53 | 1.48 |
| Shenyang     | Liaoning     | NEC | 0.88 | 0.05 | 0.55 | 1.31 | 0.58 | 0.03 | 0.38 | 0.82 | 0.81 | 0.06 | 0.32 | 1.42 |
| Tieling      | Liaoning     | NEC | 0.72 | 0.06 | 0.38 | 1.13 | 0.71 | 0.03 | 0.55 | 0.97 | 0.68 | 0.04 | 0.39 | 1.02 |
| Wafangdian   | Liaoning     | NEC | 0.44 | 0.03 | 0.22 | 0.66 | 0.39 | 0.03 | 0.27 | 0.60 | 0.47 | 0.04 | 0.16 | 0.82 |
| Yingkou      | Liaoning     | NEC | 0.79 | 0.05 | 0.38 | 1.08 | 0.71 | 0.05 | 0.41 | 1.02 | 0.82 | 0.08 | 0.31 | 1.93 |
| Baicheng     | Jilin        | NEC | 0.39 | 0.02 | 0.26 | 0.56 | 0.39 | 0.03 | 0.20 | 0.62 | 0.41 | 0.03 | 0.24 | 1.16 |
| Baishan      | Jilin        | NEC | 0.83 | 0.07 | 0.54 | 1.50 | 0.72 | 0.03 | 0.51 | 0.89 | 0.90 | 0.04 | 0.61 | 1.34 |
| Changchun    | Jilin        | NEC | 0.68 | 0.03 | 0.52 | 1.08 | 0.64 | 0.04 | 0.48 | 0.91 | 0.70 | 0.04 | 0.40 | 1.10 |
| Jilin        | Jilin        | NEC | 0.63 | 0.02 | 0.49 | 0.79 | 0.64 | 0.03 | 0.45 | 0.76 | 0.68 | 0.03 | 0.42 | 0.98 |
| Liaoyuan     | Jilin        | NEC | 0.93 | 0.04 | 0.55 | 1.26 | 0.87 | 0.07 | 0.63 | 1.63 | 0.94 | 0.03 | 0.64 | 1.20 |
| Siping       | Jilin        | NEC | 0.74 | 0.08 | 0.16 | 1.65 | 0.40 | 0.05 | 0.11 | 0.84 | 0.88 | 0.09 | 0.01 | 2.17 |
| Songyuan     | Jilin        | NEC | 0.98 | 0.10 | 0.36 | 1.78 | 0.55 | 0.03 | 0.39 | 0.70 | 1.13 | 0.11 | 0.51 | 2.16 |
| Daqing       | Heilongjiang | NEC | 0.55 | 0.02 | 0.40 | 0.66 | 0.40 | 0.02 | 0.27 | 0.58 | 0.43 | 0.02 | 0.28 | 0.70 |
| Daxinganling | Heilongjiang | NEC | 0.68 | 0.05 | 0.47 | 1.30 | 0.77 | 0.03 | 0.64 | 1.19 | 0.85 | 0.05 | 0.65 | 1.68 |
| Harbin       | Heilongjiang | NEC | 0.86 | 0.02 | 0.70 | 1.05 | 0.70 | 0.04 | 0.47 | 0.95 | 0.82 | 0.02 | 0.58 | 1.05 |
| Hegang       | Heilongjiang | NEC | 1.15 | 0.11 | 0.49 | 2.09 | 0.59 | 0.03 | 0.39 | 0.79 | 0.73 | 0.04 | 0.46 | 1.18 |
| Heihe        | Heilongjiang | NEC | 0.40 | 0.02 | 0.32 | 0.68 | 0.34 | 0.02 | 0.20 | 0.49 | 0.30 | 0.02 | 0.17 | 0.54 |
| Jixi         | Heilongjiang | NEC | 0.51 | 0.02 | 0.39 | 0.73 | 0.52 | 0.04 | 0.25 | 0.86 | 0.57 | 0.04 | 0.21 | 0.97 |
| Jiamusi      | Heilongjiang | NEC | 0.81 | 0.02 | 0.70 | 0.96 | 0.67 | 0.03 | 0.53 | 0.93 | 0.79 | 0.03 | 0.57 | 1.27 |
| Mudanjiang   | Heilongjiang | NEC | 0.45 | 0.01 | 0.36 | 0.54 | 0.42 | 0.02 | 0.30 | 0.55 | 0.46 | 0.02 | 0.32 | 0.74 |
| Qitaihe      | Heilongjiang | NEC | 0.41 | 0.01 | 0.28 | 0.56 | 0.42 | 0.02 | 0.27 | 0.60 | 0.33 | 0.02 | 0.15 | 0.58 |
| Qiqihar      | Heilongjiang | NEC | 0.61 | 0.03 | 0.37 | 0.92 | 0.44 | 0.02 | 0.35 | 0.64 | 0.54 | 0.02 | 0.35 | 0.81 |
| Shuangyashan | Heilongjiang | NEC | 0.72 | 0.05 | 0.36 | 1.34 | 0.54 | 0.06 | 0.28 | 1.00 | 0.56 | 0.03 | 0.34 | 0.89 |
| Suihua       | Heilongjiang | NEC | 0.36 | 0.03 | 0.18 | 0.60 | 0.32 | 0.02 | 0.24 | 0.46 | 0.37 | 0.03 | 0.17 | 0.75 |
| Ankang       | Shaanxi      | NEC | 0.56 | 0.02 | 0.39 | 0.77 | 0.63 | 0.01 | 0.57 | 0.75 | 0.76 | 0.02 | 0.51 | 0.97 |

|            |         |     |      |      |      |      |      |      |      |      |      |      |      |      |
|------------|---------|-----|------|------|------|------|------|------|------|------|------|------|------|------|
| Baoji      | Shaanxi | NEC | 0.89 | 0.03 | 0.63 | 1.14 | 0.90 | 0.04 | 0.65 | 1.12 | 0.80 | 0.03 | 0.51 | 1.11 |
| Hanzhong   | Shaanxi | NEC | 1.10 | 0.04 | 0.78 | 1.43 | 1.53 | 0.03 | 1.30 | 1.72 | 0.97 | 0.06 | 0.57 | 1.85 |
| Shangluo   | Shaanxi | NEC | 1.06 | 0.04 | 0.80 | 1.43 | 1.51 | 0.06 | 1.17 | 1.93 | 2.09 | 0.05 | 1.61 | 2.69 |
| Tongchuan  | Shaanxi | NEC | 0.74 | 0.04 | 0.44 | 1.05 | 0.71 | 0.02 | 0.55 | 0.82 | 0.86 | 0.04 | 0.48 | 1.27 |
| Weinan     | Shaanxi | NEC | 0.61 | 0.02 | 0.49 | 0.73 | 0.70 | 0.03 | 0.53 | 0.86 | 1.01 | 0.05 | 0.64 | 1.53 |
| Xi'an      | Shaanxi | NEC | 1.00 | 0.02 | 0.83 | 1.19 | 1.16 | 0.03 | 0.96 | 1.45 | 1.18 | 0.04 | 0.82 | 1.65 |
| Xianyang   | Shaanxi | NEC | 0.84 | 0.03 | 0.56 | 0.99 | 0.89 | 0.03 | 0.60 | 1.08 | 0.94 | 0.04 | 0.68 | 1.31 |
| Yan'an     | Shaanxi | NEC | 1.15 | 0.06 | 0.69 | 1.48 | 1.05 | 0.03 | 0.89 | 1.37 | 1.19 | 0.04 | 0.94 | 1.60 |
| Yulin      | Shaanxi | NEC | 0.94 | 0.07 | 0.40 | 1.31 | 0.68 | 0.03 | 0.49 | 0.90 | 0.82 | 0.03 | 0.48 | 1.18 |
| Baiying    | Gansu   | NEC | 0.76 | 0.04 | 0.48 | 1.06 | 0.71 | 0.02 | 0.59 | 0.83 | 0.91 | 0.04 | 0.73 | 1.38 |
| Dingxi     | Gansu   | NEC | 0.53 | 0.04 | 0.30 | 1.02 | 0.43 | 0.03 | 0.30 | 0.64 | 0.41 | 0.02 | 0.31 | 0.67 |
| Gannan     | Gansu   | NEC | 0.64 | 0.05 | 0.10 | 1.02 | 0.62 | 0.04 | 0.34 | 0.91 | 0.82 | 0.05 | 0.11 | 1.52 |
| Jiayuguan  | Gansu   | NEC | 0.67 | 0.04 | 0.37 | 1.01 | 0.60 | 0.03 | 0.44 | 0.88 | 0.52 | 0.03 | 0.28 | 0.89 |
| Jiuquan    | Gansu   | NEC | 0.55 | 0.03 | 0.23 | 0.80 | 0.56 | 0.04 | 0.31 | 0.94 | 0.60 | 0.03 | 0.40 | 1.08 |
| Lanzhou    | Gansu   | NEC | 0.89 | 0.04 | 0.56 | 1.18 | 1.05 | 0.04 | 0.81 | 1.26 | 1.03 | 0.04 | 0.76 | 1.50 |
| Linxia     | Gansu   | NEC | 0.76 | 0.01 | 0.67 | 0.92 | 0.82 | 0.03 | 0.71 | 0.99 | 0.84 | 0.03 | 0.61 | 1.11 |
| Pingliang  | Gansu   | NEC | 0.71 | 0.06 | 0.36 | 1.64 | 0.80 | 0.03 | 0.65 | 0.97 | 0.64 | 0.03 | 0.31 | 0.96 |
| Qingyang   | Gansu   | NEC | 0.78 | 0.02 | 0.65 | 0.97 | 0.87 | 0.03 | 0.75 | 1.07 | 0.85 | 0.03 | 0.59 | 1.18 |
| Tianshui   | Gansu   | NEC | 0.46 | 0.01 | 0.38 | 0.62 | 0.51 | 0.02 | 0.37 | 0.69 | 0.57 | 0.03 | 0.34 | 0.90 |
| Wuwei      | Gansu   | NEC | 2.68 | 0.04 | 2.37 | 3.02 | 2.56 | 0.11 | 2.16 | 3.22 | 1.20 | 0.17 | 0.33 | 2.51 |
| Zhangye    | Gansu   | NEC | 0.42 | 0.03 | 0.28 | 0.82 | 0.41 | 0.02 | 0.29 | 0.51 | 0.57 | 0.08 | 0.26 | 2.30 |
| Guyuan     | Ningxia | NEC | 0.60 | 0.02 | 0.48 | 0.81 | 0.59 | 0.04 | 0.39 | 0.85 | 0.49 | 0.02 | 0.29 | 0.72 |
| Shizuishan | Ningxia | NEC | 0.52 | 0.04 | 0.26 | 1.02 | 0.59 | 0.04 | 0.38 | 0.85 | 0.66 | 0.05 | 0.29 | 1.36 |
| Wuzhong    | Ningxia | NEC | 0.93 | 0.05 | 0.73 | 1.59 | 0.89 | 0.02 | 0.73 | 1.07 | 0.66 | 0.03 | 0.39 | 1.10 |
| Yinchuan   | Ningxia | NEC | 0.83 | 0.04 | 0.52 | 1.12 | 0.87 | 0.03 | 0.69 | 1.10 | 0.87 | 0.04 | 0.53 | 1.31 |
| Zhongwei   | Ningxia | NEC | 1.02 | 0.01 | 0.95 | 1.19 | 1.07 | 0.04 | 0.84 | 1.34 | 0.77 | 0.07 | 0.30 | 1.41 |

|           |          |     |      |      |      |      |      |      |      |      |      |      |      |      |
|-----------|----------|-----|------|------|------|------|------|------|------|------|------|------|------|------|
| Aksu      | Sinkiang | NEC | 0.80 | 0.10 | 0.37 | 1.76 | 1.32 | 0.14 | 0.36 | 2.35 | 0.88 | 0.14 | 0.00 | 2.49 |
| Hami      | Sinkiang | NEC | 0.97 | 0.06 | 0.58 | 1.42 | 0.71 | 0.05 | 0.40 | 1.02 | 0.88 | 0.07 | 0.36 | 1.82 |
| Hotan     | Sinkiang | NEC | 0.60 | 0.05 | 0.24 | 1.08 | 0.99 | 0.06 | 0.65 | 1.40 | 0.68 | 0.05 | 0.24 | 1.23 |
| Kashgar   | Sinkiang | NEC | 0.57 | 0.03 | 0.30 | 0.87 | 0.55 | 0.04 | 0.35 | 0.85 | 0.66 | 0.05 | 0.28 | 1.14 |
| Karamay   | Sinkiang | NEC | 1.12 | 0.03 | 0.88 | 1.36 | 1.21 | 0.03 | 1.06 | 1.36 | 1.28 | 0.04 | 0.98 | 1.65 |
| Kizilsu   | Sinkiang | NEC | 1.06 | 0.06 | 0.61 | 1.56 | 1.23 | 0.12 | 0.59 | 1.79 | 1.14 | 0.10 | 0.12 | 1.85 |
| Shihezi   | Sinkiang | NEC | 0.67 | 0.05 | 0.44 | 1.27 | 0.84 | 0.04 | 0.61 | 1.11 | 0.71 | 0.04 | 0.38 | 1.07 |
| Urumchi   | Sinkiang | NEC | 0.74 | 0.03 | 0.51 | 1.03 | 0.66 | 0.03 | 0.47 | 0.93 | 0.72 | 0.04 | 0.45 | 1.37 |
| Wujiaqu   | Sinkiang | NEC | 0.63 | 0.04 | 0.29 | 0.97 | 0.52 | 0.06 | 0.20 | 0.86 | 0.63 | 0.05 | 0.30 | 1.48 |
| Yili      | Sinkiang | NEC | 1.16 | 0.03 | 0.87 | 1.39 | 1.34 | 0.06 | 0.89 | 1.74 | 0.94 | 0.06 | 0.52 | 1.71 |
| Ezhou     | Hubei    | NEC | 1.03 | 0.06 | 0.77 | 1.79 | 1.10 | 0.03 | 0.95 | 1.29 | 1.20 | 0.04 | 0.89 | 1.58 |
| Huanggang | Hubei    | NEC | 0.87 | 0.05 | 0.36 | 1.18 | 1.05 | 0.03 | 0.75 | 1.15 | 1.28 | 0.03 | 0.99 | 1.65 |
| Jingmen   | Hubei    | NEC | 0.65 | 0.04 | 0.44 | 1.07 | 0.82 | 0.02 | 0.65 | 0.96 | 0.79 | 0.03 | 0.47 | 1.05 |
| Shiyan    | Hubei    | NEC | 0.94 | 0.04 | 0.65 | 1.39 | 0.86 | 0.05 | 0.53 | 1.30 | 1.26 | 0.05 | 0.87 | 1.94 |
| Wuhan     | Hubei    | NEC | 0.66 | 0.05 | 0.42 | 1.07 | 0.93 | 0.05 | 0.54 | 1.16 | 0.93 | 0.02 | 0.61 | 1.14 |
| Xianning  | Hubei    | NEC | 1.10 | 0.05 | 0.74 | 1.48 | 1.44 | 0.03 | 1.11 | 1.63 | 1.30 | 0.03 | 1.07 | 1.60 |
| Xiangyang | Hubei    | NEC | 0.75 | 0.04 | 0.60 | 1.14 | 0.87 | 0.03 | 0.72 | 1.13 | 0.97 | 0.03 | 0.72 | 1.44 |
| Xiaogan   | Hubei    | NEC | 1.40 | 0.06 | 1.11 | 1.92 | 1.72 | 0.05 | 1.40 | 2.14 | 1.41 | 0.10 | 0.54 | 2.81 |
| Yichang   | Hubei    | NEC | 0.82 | 0.04 | 0.54 | 1.13 | 0.97 | 0.02 | 0.86 | 1.17 | 1.07 | 0.03 | 0.69 | 1.45 |
| Anqing    | Anhui    | NEC | 0.45 | 0.05 | 0.16 | 0.78 | 0.62 | 0.03 | 0.43 | 0.81 | 0.65 | 0.03 | 0.39 | 0.93 |
| Bengbu    | Anhui    | NEC | 0.65 | 0.04 | 0.30 | 0.92 | 0.85 | 0.03 | 0.69 | 1.10 | 0.76 | 0.04 | 0.49 | 1.36 |
| Bozhou    | Anhui    | NEC | 0.48 | 0.04 | 0.25 | 0.78 | 0.88 | 0.04 | 0.60 | 1.15 | 0.93 | 0.04 | 0.54 | 1.45 |
| Chuzhou   | Anhui    | NEC | 0.54 | 0.06 | 0.28 | 1.00 | 0.74 | 0.04 | 0.48 | 0.96 | 0.72 | 0.03 | 0.49 | 1.09 |
| Fuyang    | Anhui    | NEC | 0.53 | 0.07 | 0.18 | 1.13 | 0.72 | 0.04 | 0.50 | 1.02 | 0.64 | 0.05 | 0.34 | 1.36 |
| Hefei     | Anhui    | NEC | 0.75 | 0.04 | 0.45 | 1.06 | 0.85 | 0.04 | 0.66 | 1.15 | 0.86 | 0.02 | 0.68 | 1.15 |
| Huaibei   | Anhui    | NEC | 0.85 | 0.05 | 0.57 | 1.24 | 1.20 | 0.03 | 1.01 | 1.44 | 0.99 | 0.05 | 0.58 | 1.53 |

|             |              |     |      |      |      |      |      |      |      |      |      |      |      |      |
|-------------|--------------|-----|------|------|------|------|------|------|------|------|------|------|------|------|
| Huainan     | Anhui        | NEC | 0.64 | 0.06 | 0.24 | 1.07 | 0.89 | 0.03 | 0.67 | 1.16 | 0.81 | 0.04 | 0.44 | 1.39 |
| Huangshan   | Anhui        | NEC | 0.12 | 0.01 | 0.07 | 0.18 | 0.17 | 0.02 | 0.11 | 0.36 | 0.13 | 0.01 | 0.08 | 0.18 |
| Lu'an       | Anhui        | NEC | 0.68 | 0.04 | 0.36 | 1.07 | 0.56 | 0.03 | 0.39 | 0.76 | 0.53 | 0.02 | 0.39 | 0.77 |
| Ma'anshan   | Anhui        | NEC | 1.10 | 0.03 | 0.84 | 1.36 | 1.34 | 0.05 | 1.02 | 1.58 | 1.33 | 0.05 | 0.94 | 2.00 |
| Suzhou      | Anhui        | NEC | 0.57 | 0.07 | 0.23 | 1.14 | 0.97 | 0.06 | 0.71 | 1.41 | 0.93 | 0.08 | 0.46 | 2.09 |
| Tongling    | Anhui        | NEC | 0.82 | 0.05 | 0.53 | 1.23 | 1.05 | 0.06 | 0.76 | 1.53 | 0.97 | 0.03 | 0.67 | 1.25 |
| Wuhu        | Anhui        | NEC | 0.65 | 0.05 | 0.33 | 1.00 | 0.81 | 0.04 | 0.63 | 1.19 | 0.72 | 0.03 | 0.50 | 1.08 |
| Changzhou   | Jiangsu      | NEC | 0.80 | 0.03 | 0.59 | 1.15 | 0.85 | 0.06 | 0.43 | 1.18 | 0.71 | 0.03 | 0.46 | 1.19 |
| Huaian      | Jiangsu      | NEC | 0.69 | 0.05 | 0.32 | 1.07 | 0.89 | 0.06 | 0.46 | 1.29 | 0.69 | 0.03 | 0.50 | 0.95 |
| Lianyungang | Jiangsu      | NEC | 0.62 | 0.04 | 0.30 | 0.96 | 0.87 | 0.05 | 0.52 | 1.24 | 0.71 | 0.04 | 0.32 | 1.11 |
| Nanjing     | Jiangsu      | NEC | 0.69 | 0.04 | 0.40 | 0.98 | 0.84 | 0.05 | 0.50 | 1.19 | 0.73 | 0.03 | 0.55 | 1.09 |
| Nantong     | Jiangsu      | NEC | 0.54 | 0.05 | 0.32 | 1.18 | 0.72 | 0.06 | 0.43 | 1.37 | 0.54 | 0.03 | 0.36 | 0.93 |
| Suzhou      | Jiangsu      | NEC | 0.69 | 0.03 | 0.43 | 0.85 | 0.94 | 0.05 | 0.60 | 1.32 | 0.75 | 0.03 | 0.57 | 1.04 |
| Suqian      | Jiangsu      | NEC | 0.64 | 0.04 | 0.33 | 0.97 | 1.01 | 0.05 | 0.68 | 1.46 | 0.90 | 0.05 | 0.46 | 1.73 |
| Taizhou     | Jiangsu      | NEC | 0.84 | 0.05 | 0.52 | 1.30 | 0.92 | 0.04 | 0.66 | 1.16 | 0.87 | 0.03 | 0.67 | 1.25 |
| Wuxi        | Jiangsu      | NEC | 0.84 | 0.03 | 0.66 | 1.32 | 1.18 | 0.05 | 0.96 | 1.65 | 1.07 | 0.02 | 0.83 | 1.31 |
| Xuzhou      | Jiangsu      | NEC | 0.98 | 0.05 | 0.66 | 1.33 | 1.31 | 0.06 | 1.00 | 1.75 | 1.14 | 0.06 | 0.71 | 2.36 |
| Yanchen     | Jiangsu      | NEC | 0.59 | 0.04 | 0.33 | 1.06 | 0.68 | 0.04 | 0.44 | 0.93 | 0.57 | 0.02 | 0.41 | 0.89 |
| Yangzhou    | Jiangsu      | NEC | 0.62 | 0.05 | 0.26 | 1.01 | 0.60 | 0.03 | 0.39 | 0.74 | 0.70 | 0.03 | 0.35 | 0.94 |
| Zhenjiang   | Jiangsu      | NEC | 0.74 | 0.03 | 0.47 | 1.05 | 0.80 | 0.04 | 0.52 | 1.00 | 0.66 | 0.03 | 0.50 | 1.05 |
| Shanghai    | Municipality | NEC | 0.65 | 0.02 | 0.50 | 0.76 | 0.89 | 0.05 | 0.67 | 1.26 | 0.67 | 0.03 | 0.48 | 1.00 |
| Hangzhou    | Zhejiang     | NEC | 0.68 | 0.03 | 0.44 | 0.87 | 0.90 | 0.03 | 0.68 | 1.16 | 0.78 | 0.02 | 0.54 | 1.01 |
| Huzhou      | Zhejiang     | NEC | 0.63 | 0.03 | 0.43 | 0.86 | 0.87 | 0.03 | 0.69 | 1.05 | 0.74 | 0.02 | 0.55 | 1.09 |
| Jiaxing     | Zhejiang     | NEC | 0.56 | 0.02 | 0.39 | 0.74 | 0.76 | 0.04 | 0.47 | 1.02 | 0.56 | 0.03 | 0.30 | 0.95 |
| Jinhua      | Zhejiang     | NEC | 0.67 | 0.03 | 0.47 | 0.85 | 0.85 | 0.07 | 0.63 | 1.45 | 0.80 | 0.02 | 0.53 | 0.99 |
| Lishui      | Zhejiang     | NEC | 0.52 | 0.02 | 0.39 | 0.66 | 0.58 | 0.02 | 0.44 | 0.71 | 0.62 | 0.02 | 0.44 | 0.85 |



|             |          |     |      |      |      |      |      |      |      |      |      |      |      |      |
|-------------|----------|-----|------|------|------|------|------|------|------|------|------|------|------|------|
| Ningbo      | Zhejiang | NEC | 0.71 | 0.02 | 0.58 | 0.88 | 0.87 | 0.04 | 0.67 | 1.14 | 0.83 | 0.02 | 0.67 | 1.05 |
| Quzhou      | Zhejiang | NEC | 0.67 | 0.03 | 0.47 | 0.85 | 0.87 | 0.06 | 0.63 | 1.45 | 0.76 | 0.02 | 0.57 | 0.97 |
| Shaoxing    | Zhejiang | NEC | 0.64 | 0.04 | 0.42 | 0.92 | 0.86 | 0.05 | 0.54 | 1.23 | 0.79 | 0.03 | 0.53 | 1.09 |
| Taizhou     | Zhejiang | NEC | 0.61 | 0.02 | 0.41 | 0.82 | 0.70 | 0.04 | 0.46 | 0.88 | 0.72 | 0.02 | 0.54 | 0.94 |
| Wenjiang    | Zhejiang | NEC | 0.71 | 0.03 | 0.52 | 0.92 | 0.72 | 0.03 | 0.53 | 0.92 | 0.69 | 0.02 | 0.52 | 0.95 |
| Zhoushan    | Zhejiang | NEC | 0.50 | 0.03 | 0.34 | 0.82 | 0.64 | 0.04 | 0.42 | 0.93 | 0.55 | 0.03 | 0.38 | 0.92 |
| Fuzhou      | Jiangxi  | NEC | 0.75 | 0.02 | 0.65 | 0.88 | 0.83 | 0.03 | 0.59 | 0.96 | 1.00 | 0.03 | 0.65 | 1.24 |
| Ganzhou     | Jiangxi  | NEC | 1.22 | 0.02 | 1.06 | 1.32 | 1.29 | 0.04 | 1.09 | 1.53 | 1.26 | 0.02 | 1.11 | 1.57 |
| Ji'an       | Jiangxi  | NEC | 0.69 | 0.02 | 0.52 | 0.82 | 0.89 | 0.02 | 0.75 | 1.05 | 0.90 | 0.02 | 0.70 | 1.18 |
| Jingdezhen  | Jiangxi  | NEC | 0.59 | 0.02 | 0.41 | 0.75 | 0.75 | 0.04 | 0.52 | 1.09 | 0.62 | 0.01 | 0.46 | 0.83 |
| Jiujiang    | Jiangxi  | NEC | 0.61 | 0.02 | 0.40 | 0.82 | 0.69 | 0.03 | 0.48 | 0.86 | 0.65 | 0.01 | 0.56 | 0.79 |
| Nanchang    | Jiangxi  | NEC | 0.81 | 0.02 | 0.69 | 1.00 | 0.89 | 0.04 | 0.67 | 1.06 | 0.69 | 0.02 | 0.51 | 0.89 |
| Pingxiang   | Jiangxi  | NEC | 0.60 | 0.04 | 0.40 | 1.10 | 0.95 | 0.07 | 0.58 | 1.76 | 0.77 | 0.03 | 0.55 | 1.04 |
| Shangrao    | Jiangxi  | NEC | 0.49 | 0.04 | 0.31 | 0.74 | 0.48 | 0.04 | 0.33 | 0.81 | 0.39 | 0.02 | 0.31 | 0.69 |
| Xinyu       | Jiangxi  | NEC | 1.38 | 0.05 | 1.01 | 1.96 | 1.36 | 0.05 | 1.07 | 1.67 | 1.27 | 0.02 | 1.10 | 1.71 |
| Yichun      | Jiangxi  | NEC | 0.87 | 0.03 | 0.62 | 1.08 | 0.94 | 0.03 | 0.67 | 1.13 | 0.86 | 0.02 | 0.66 | 1.06 |
| Yingtian    | Jiangxi  | NEC | 0.55 | 0.02 | 0.41 | 0.73 | 0.70 | 0.02 | 0.60 | 0.81 | 0.70 | 0.02 | 0.48 | 0.89 |
| Changsha    | Hunan    | NEC | 0.64 | 0.02 | 0.53 | 0.78 | 0.82 | 0.03 | 0.63 | 1.02 | 0.80 | 0.02 | 0.60 | 1.00 |
| Changde     | Hunan    | NEC | 1.15 | 0.05 | 0.60 | 1.52 | 1.16 | 0.04 | 0.87 | 1.42 | 1.26 | 0.04 | 0.91 | 1.75 |
| Chenzhou    | Hunan    | NEC | 0.82 | 0.04 | 0.54 | 1.18 | 1.10 | 0.05 | 0.86 | 1.44 | 1.08 | 0.03 | 0.79 | 1.41 |
| Huaihua     | Hunan    | NEC | 1.33 | 0.03 | 1.08 | 1.54 | 1.36 | 0.03 | 1.05 | 1.54 | 1.19 | 0.03 | 0.94 | 1.55 |
| Loudi       | Hunan    | NEC | 1.20 | 0.08 | 0.65 | 1.75 | 1.76 | 0.05 | 1.49 | 2.09 | 1.28 | 0.05 | 0.70 | 1.61 |
| Xiangtan    | Hunan    | NEC | 1.01 | 0.03 | 0.72 | 1.18 | 1.06 | 0.04 | 0.80 | 1.31 | 0.96 | 0.03 | 0.73 | 1.24 |
| Yiyang      | Hunan    | NEC | 0.53 | 0.05 | 0.24 | 0.90 | 0.85 | 0.03 | 0.65 | 1.06 | 0.89 | 0.02 | 0.66 | 1.06 |
| Yongzhou    | Hunan    | NEC | 0.46 | 0.02 | 0.33 | 0.62 | 0.63 | 0.03 | 0.37 | 0.74 | 0.67 | 0.03 | 0.36 | 0.96 |
| Zhangjiajie | Hunan    | NEC | 1.23 | 0.05 | 0.76 | 1.58 | 1.58 | 0.06 | 1.27 | 2.02 | 1.88 | 0.08 | 1.11 | 2.55 |

|           |           |     |      |      |      |      |      |      |      |      |      |      |      |      |
|-----------|-----------|-----|------|------|------|------|------|------|------|------|------|------|------|------|
| Zhuzhou   | Hunan     | NEC | 0.60 | 0.03 | 0.45 | 0.79 | 0.85 | 0.04 | 0.62 | 1.10 | 0.76 | 0.02 | 0.56 | 1.00 |
| Dongguan  | Guangdong | NEC | 0.68 | 0.02 | 0.55 | 0.95 | 0.82 | 0.01 | 0.72 | 0.94 | 0.72 | 0.02 | 0.59 | 1.02 |
| Foshan    | Guangdong | NEC | 0.75 | 0.02 | 0.63 | 0.96 | 0.86 | 0.02 | 0.72 | 1.00 | 0.86 | 0.02 | 0.65 | 1.07 |
| Guangzhou | Guangdong | NEC | 0.83 | 0.02 | 0.62 | 0.98 | 0.90 | 0.02 | 0.75 | 0.98 | 0.88 | 0.02 | 0.66 | 1.04 |
| Heyuan    | Guangdong | NEC | 0.77 | 0.02 | 0.56 | 0.94 | 0.83 | 0.01 | 0.77 | 0.93 | 0.93 | 0.02 | 0.76 | 1.13 |
| Huizhou   | Guangdong | NEC | 0.72 | 0.02 | 0.60 | 0.86 | 0.78 | 0.03 | 0.62 | 0.97 | 0.56 | 0.02 | 0.42 | 0.77 |
| Jiangmen  | Guangdong | NEC | 0.78 | 0.02 | 0.62 | 0.98 | 0.99 | 0.04 | 0.80 | 1.26 | 0.89 | 0.03 | 0.66 | 1.13 |
| Maoming   | Guangdong | NEC | 0.79 | 0.02 | 0.67 | 0.96 | 0.93 | 0.04 | 0.73 | 1.18 | 0.77 | 0.02 | 0.55 | 1.03 |
| Meizhou   | Guangdong | NEC | 0.72 | 0.02 | 0.58 | 0.91 | 0.88 | 0.01 | 0.79 | 0.97 | 1.00 | 0.02 | 0.79 | 1.17 |
| Qingyuan  | Guangdong | NEC | 0.87 | 0.03 | 0.60 | 1.11 | 0.93 | 0.02 | 0.83 | 1.07 | 0.96 | 0.02 | 0.75 | 1.29 |
| Shantou   | Guangdong | NEC | 0.85 | 0.03 | 0.67 | 1.15 | 0.86 | 0.02 | 0.74 | 1.09 | 0.85 | 0.02 | 0.68 | 1.24 |
| Shaoguan  | Guangdong | NEC | 0.89 | 0.02 | 0.73 | 1.00 | 0.81 | 0.03 | 0.61 | 0.97 | 1.04 | 0.03 | 0.86 | 1.32 |
| Shenzhen  | Guangdong | NEC | 0.83 | 0.02 | 0.69 | 0.95 | 0.82 | 0.03 | 0.67 | 1.01 | 0.76 | 0.02 | 0.62 | 0.96 |
| Zhujiang  | Guangdong | NEC | 0.74 | 0.03 | 0.44 | 0.90 | 0.70 | 0.02 | 0.55 | 0.84 | 0.71 | 0.02 | 0.57 | 0.94 |
| Zhaoqing  | Guangdong | NEC | 0.62 | 0.02 | 0.50 | 0.81 | 0.84 | 0.04 | 0.55 | 1.11 | 0.87 | 0.02 | 0.66 | 1.18 |
| Zhongshan | Guangdong | NEC | 0.88 | 0.03 | 0.59 | 1.11 | 1.00 | 0.07 | 0.59 | 1.28 | 0.87 | 0.03 | 0.56 | 1.20 |
| Zhuhai    | Guangdong | NEC | 0.72 | 0.02 | 0.53 | 0.87 | 0.83 | 0.04 | 0.60 | 1.00 | 0.74 | 0.02 | 0.56 | 0.99 |
| Fuzhou    | Fujian    | NEC | 0.57 | 0.02 | 0.43 | 0.80 | 0.62 | 0.03 | 0.41 | 0.79 | 0.69 | 0.02 | 0.50 | 1.06 |
| Longyan   | Fujian    | NEC | 0.68 | 0.02 | 0.47 | 0.84 | 0.71 | 0.03 | 0.54 | 0.88 | 0.85 | 0.02 | 0.65 | 1.14 |
| Nanping   | Fujian    | NEC | 0.78 | 0.02 | 0.60 | 0.92 | 0.77 | 0.01 | 0.67 | 0.84 | 0.81 | 0.02 | 0.67 | 1.02 |
| Ningde    | Fujian    | NEC | 0.65 | 0.04 | 0.27 | 1.08 | 0.60 | 0.05 | 0.34 | 0.85 | 0.70 | 0.03 | 0.49 | 1.22 |
| Putian    | Fujian    | NEC | 0.63 | 0.03 | 0.46 | 0.97 | 0.59 | 0.03 | 0.38 | 0.75 | 0.61 | 0.03 | 0.38 | 1.01 |
| Quanzhou  | Fujian    | NEC | 0.55 | 0.02 | 0.36 | 0.70 | 0.59 | 0.02 | 0.44 | 0.72 | 0.59 | 0.02 | 0.43 | 0.95 |
| Sanming   | Fujian    | NEC | 1.17 | 0.05 | 0.82 | 1.46 | 1.04 | 0.06 | 0.74 | 1.41 | 1.09 | 0.04 | 0.80 | 1.52 |
| Xiamen    | Fujian    | NEC | 0.44 | 0.02 | 0.31 | 0.64 | 0.56 | 0.03 | 0.33 | 0.72 | 0.60 | 0.02 | 0.45 | 0.80 |
| Zhangzhou | Fujian    | NEC | 0.55 | 0.02 | 0.37 | 0.71 | 0.57 | 0.02 | 0.45 | 0.64 | 0.60 | 0.02 | 0.44 | 0.85 |

|           |              |     |      |      |      |      |      |      |      |      |      |      |      |      |
|-----------|--------------|-----|------|------|------|------|------|------|------|------|------|------|------|------|
| Haikou    | Hainan       | NEC | 0.52 | 0.02 | 0.35 | 0.72 | 0.63 | 0.03 | 0.48 | 0.79 | 0.58 | 0.02 | 0.40 | 0.87 |
| Sanya     | Hainan       | NEC | 0.57 | 0.02 | 0.44 | 0.75 | 0.64 | 0.04 | 0.46 | 0.89 | 0.71 | 0.02 | 0.59 | 0.88 |
| Chongqing | Municipality | NEC | 0.84 | 0.04 | 0.57 | 1.12 | 1.11 | 0.03 | 0.86 | 1.28 | 1.11 | 0.02 | 0.77 | 1.35 |
| Bazhong   | Sichuan      | NEC | 0.67 | 0.02 | 0.55 | 0.79 | 0.82 | 0.02 | 0.64 | 0.93 | 0.81 | 0.02 | 0.56 | 1.02 |
| Chengdu   | Sichuan      | NEC | 0.84 | 0.03 | 0.52 | 1.06 | 1.07 | 0.05 | 0.79 | 1.44 | 0.96 | 0.03 | 0.77 | 1.32 |
| Dazhou    | Sichuan      | NEC | 0.66 | 0.05 | 0.40 | 1.06 | 0.96 | 0.05 | 0.60 | 1.23 | 0.82 | 0.03 | 0.52 | 1.18 |
| Deyang    | Sichuan      | NEC | 0.90 | 0.03 | 0.67 | 1.08 | 1.24 | 0.04 | 0.94 | 1.51 | 0.90 | 0.03 | 0.66 | 1.26 |
| Guangyuan | Sichuan      | NEC | 0.26 | 0.01 | 0.18 | 0.37 | 0.37 | 0.02 | 0.26 | 0.45 | 0.43 | 0.01 | 0.28 | 0.59 |
| Leshan    | Sichuan      | NEC | 0.81 | 0.03 | 0.64 | 1.03 | 1.03 | 0.06 | 0.70 | 1.45 | 0.92 | 0.02 | 0.71 | 1.37 |
| Luzhou    | Sichuan      | NEC | 0.52 | 0.03 | 0.32 | 0.82 | 0.66 | 0.03 | 0.42 | 0.90 | 0.47 | 0.03 | 0.18 | 0.83 |
| Meishan   | Sichuan      | NEC | 0.46 | 0.02 | 0.29 | 0.63 | 0.67 | 0.03 | 0.43 | 0.90 | 0.55 | 0.03 | 0.34 | 0.92 |
| Mianyang  | Sichuan      | NEC | 0.80 | 0.03 | 0.60 | 1.00 | 0.90 | 0.03 | 0.73 | 1.12 | 0.79 | 0.02 | 0.57 | 0.99 |
| Nanchong  | Sichuan      | NEC | 0.64 | 0.03 | 0.48 | 0.92 | 0.73 | 0.02 | 0.59 | 0.88 | 0.61 | 0.02 | 0.44 | 0.81 |
| Panzhihua | Sichuan      | NEC | 1.43 | 0.05 | 1.12 | 1.83 | 1.47 | 0.06 | 1.13 | 1.93 | 1.34 | 0.03 | 1.02 | 1.67 |
| Suining   | Sichuan      | NEC | 0.82 | 0.02 | 0.69 | 1.02 | 0.78 | 0.02 | 0.69 | 0.91 | 0.92 | 0.02 | 0.80 | 1.17 |
| Ya'an     | Sichuan      | NEC | 0.65 | 0.03 | 0.50 | 0.98 | 0.74 | 0.02 | 0.56 | 0.89 | 0.77 | 0.03 | 0.53 | 1.04 |
| Ziyang    | Sichuan      | NEC | 0.50 | 0.02 | 0.38 | 0.72 | 0.62 | 0.02 | 0.44 | 0.75 | 0.62 | 0.02 | 0.43 | 0.80 |
| Zigong    | Sichuan      | NEC | 0.51 | 0.04 | 0.29 | 0.85 | 0.78 | 0.04 | 0.52 | 1.07 | 0.68 | 0.03 | 0.37 | 0.90 |
| Baoshan   | Yunnan       | NEC | 0.71 | 0.02 | 0.59 | 0.94 | 0.88 | 0.04 | 0.67 | 1.16 | 0.61 | 0.04 | 0.27 | 1.03 |
| Chuxiong  | Yunnan       | NEC | 0.70 | 0.03 | 0.53 | 0.94 | 0.83 | 0.04 | 0.57 | 1.13 | 0.70 | 0.02 | 0.55 | 0.84 |
| Dali      | Yunnan       | NEC | 0.41 | 0.02 | 0.27 | 0.58 | 0.45 | 0.04 | 0.25 | 0.79 | 0.30 | 0.01 | 0.21 | 0.40 |
| Dehong    | Yunnan       | NEC | 0.49 | 0.02 | 0.35 | 0.67 | 0.63 | 0.02 | 0.53 | 0.75 | 0.66 | 0.02 | 0.41 | 0.86 |
| Honghe    | Yunnan       | NEC | 0.46 | 0.04 | 0.28 | 0.95 | 0.54 | 0.05 | 0.31 | 0.86 | 0.46 | 0.02 | 0.29 | 0.79 |
| Kunming   | Yunnan       | NEC | 0.77 | 0.04 | 0.47 | 1.05 | 0.85 | 0.03 | 0.64 | 1.04 | 0.84 | 0.03 | 0.65 | 1.19 |
| Lijiang   | Yunnan       | NEC | 0.98 | 0.03 | 0.71 | 1.17 | 0.84 | 0.02 | 0.72 | 0.97 | 0.75 | 0.03 | 0.41 | 1.07 |
| Lincang   | Yunnan       | NEC | 0.30 | 0.04 | 0.11 | 0.91 | 0.49 | 0.02 | 0.36 | 0.63 | 0.58 | 0.03 | 0.39 | 1.12 |

|               |         |     |      |      |      |      |      |      |      |      |      |      |      |      |
|---------------|---------|-----|------|------|------|------|------|------|------|------|------|------|------|------|
| Nujiang       | Yunnan  | NEC | 0.62 | 0.04 | 0.30 | 0.95 | 0.54 | 0.02 | 0.43 | 0.66 | 0.64 | 0.02 | 0.44 | 0.77 |
| Qujing        | Yunnan  | NEC | 0.76 | 0.03 | 0.56 | 1.10 | 1.06 | 0.04 | 0.81 | 1.38 | 0.92 | 0.03 | 0.62 | 1.22 |
| Wenshan       | Yunnan  | NEC | 0.57 | 0.02 | 0.40 | 0.82 | 0.58 | 0.02 | 0.49 | 0.73 | 0.50 | 0.02 | 0.31 | 0.63 |
| Xishuangbanna | Yunnan  | NEC | 0.59 | 0.02 | 0.47 | 0.82 | 0.64 | 0.02 | 0.54 | 0.79 | 0.64 | 0.02 | 0.47 | 0.79 |
| Tuxi          | Yunnan  | NEC | 0.97 | 0.07 | 0.68 | 1.97 | 1.29 | 0.06 | 0.99 | 1.70 | 1.12 | 0.06 | 0.80 | 1.99 |
| Zhaotong      | Yunnan  | NEC | 0.71 | 0.04 | 0.40 | 1.08 | 0.98 | 0.04 | 0.74 | 1.23 | 0.96 | 0.04 | 0.60 | 1.35 |
| Anshun        | Guizhou | NEC | 0.31 | 0.02 | 0.20 | 0.47 | 0.49 | 0.03 | 0.37 | 0.70 | 0.41 | 0.02 | 0.23 | 0.69 |
| Bijie         | Guizhou | NEC | 0.80 | 0.05 | 0.45 | 1.21 | 1.10 | 0.05 | 0.77 | 1.42 | 0.91 | 0.03 | 0.61 | 1.19 |
| Guiyang       | Guizhou | NEC | 0.53 | 0.02 | 0.39 | 0.73 | 0.71 | 0.02 | 0.63 | 0.89 | 0.62 | 0.02 | 0.41 | 0.84 |
| Liupanshui    | Guizhou | NEC | 0.46 | 0.06 | 0.14 | 1.30 | 0.61 | 0.04 | 0.41 | 0.98 | 0.52 | 0.03 | 0.29 | 0.85 |
| Tongren       | Guizhou | NEC | 0.48 | 0.02 | 0.33 | 0.68 | 0.67 | 0.01 | 0.60 | 0.72 | 0.51 | 0.02 | 0.20 | 0.73 |
| Zunyi         | Guizhou | NEC | 0.63 | 0.02 | 0.50 | 0.80 | 0.80 | 0.03 | 0.56 | 1.00 | 0.84 | 0.02 | 0.54 | 1.11 |
| Baise         | Guangxi | NEC | 1.00 | 0.03 | 0.75 | 1.20 | 0.48 | 0.03 | 0.31 | 0.78 | 0.60 | 0.02 | 0.37 | 0.88 |
| Beihai        | Guangxi | NEC | 0.81 | 0.03 | 0.63 | 0.99 | 1.08 | 0.03 | 0.87 | 1.25 | 1.04 | 0.02 | 0.85 | 1.23 |
| Chongzuo      | Guangxi | NEC | 0.76 | 0.02 | 0.62 | 0.93 | 0.87 | 0.03 | 0.68 | 1.04 | 0.90 | 0.03 | 0.67 | 1.15 |
| Fangchenggang | Guangxi | NEC | 0.65 | 0.01 | 0.60 | 0.72 | 0.85 | 0.03 | 0.65 | 1.03 | 0.77 | 0.03 | 0.48 | 1.13 |
| Guigang       | Guangxi | NEC | 0.79 | 0.02 | 0.65 | 1.03 | 0.92 | 0.04 | 0.66 | 1.21 | 1.00 | 0.03 | 0.73 | 1.47 |
| Guilin        | Guangxi | NEC | 0.77 | 0.01 | 0.68 | 0.85 | 0.83 | 0.02 | 0.69 | 0.99 | 1.04 | 0.02 | 0.83 | 1.25 |
| Hechi         | Guangxi | NEC | 1.10 | 0.05 | 0.76 | 1.60 | 1.09 | 0.06 | 0.71 | 1.50 | 1.19 | 0.06 | 0.65 | 2.18 |
| Hezhou        | Guangxi | NEC | 1.06 | 0.09 | 0.60 | 2.33 | 0.84 | 0.04 | 0.43 | 1.09 | 0.94 | 0.05 | 0.56 | 1.32 |
| Laibin        | Guangxi | NEC | 0.82 | 0.02 | 0.65 | 0.98 | 0.94 | 0.04 | 0.76 | 1.17 | 0.93 | 0.03 | 0.67 | 1.24 |
| Liuzhou       | Guangxi | NEC | 0.91 | 0.02 | 0.77 | 1.11 | 0.98 | 0.03 | 0.75 | 1.15 | 1.02 | 0.03 | 0.73 | 1.36 |
| Nanning       | Guangxi | NEC | 0.77 | 0.02 | 0.58 | 0.96 | 0.89 | 0.03 | 0.71 | 1.02 | 0.92 | 0.02 | 0.73 | 1.13 |
| Qinzhou       | Guangxi | NEC | 1.16 | 0.04 | 0.87 | 1.57 | 1.11 | 0.03 | 0.90 | 1.39 | 1.01 | 0.02 | 0.75 | 1.22 |
| Wuzhou        | Guangxi | NEC | 0.75 | 0.02 | 0.66 | 0.94 | 0.88 | 0.06 | 0.63 | 1.33 | 0.94 | 0.03 | 0.71 | 1.26 |
| Yulin         | Guangxi | NEC | 0.90 | 0.04 | 0.61 | 1.23 | 0.76 | 0.02 | 0.57 | 0.89 | 0.98 | 0.03 | 0.76 | 1.29 |

|          |         |     |      |      |      |      |      |      |      |      |      |      |      |      |
|----------|---------|-----|------|------|------|------|------|------|------|------|------|------|------|------|
| Golog    | Qinghai | NEC | 0.55 | 0.01 | 0.42 | 0.63 | 0.64 | 0.03 | 0.47 | 0.92 | 0.78 | 0.08 | 0.44 | 1.89 |
| Haidong  | Qinghai | NEC | 0.82 | 0.04 | 0.56 | 1.22 | 0.90 | 0.04 | 0.66 | 1.15 | 0.93 | 0.04 | 0.63 | 1.51 |
| Xining   | Qinghai | NEC | 1.08 | 0.04 | 0.82 | 1.54 | 1.09 | 0.05 | 0.80 | 1.46 | 1.16 | 0.05 | 0.80 | 1.82 |
| Ali      | Tibet   | NEC | 0.35 | 0.01 | 0.23 | 0.42 | 0.20 | 0.03 | 0.13 | 0.63 | 0.33 | 0.02 | 0.20 | 0.57 |
| Qamdo    | Tibet   | NEC | 0.80 | 0.03 | 0.53 | 1.03 | 1.13 | 0.03 | 0.92 | 1.31 | 1.39 | 0.05 | 0.95 | 2.15 |
| Lhasa    | Tibet   | NEC | 0.57 | 0.01 | 0.46 | 0.68 | 0.50 | 0.02 | 0.41 | 0.61 | 0.64 | 0.02 | 0.44 | 0.77 |
| Nyingchi | Tibet   | NEC | 0.41 | 0.01 | 0.34 | 0.50 | 0.44 | 0.01 | 0.39 | 0.53 | 0.47 | 0.02 | 0.32 | 0.61 |
| Naqu     | Tibet   | NEC | 0.96 | 0.04 | 0.60 | 1.22 | 1.41 | 0.02 | 1.30 | 1.56 | 1.20 | 0.05 | 0.76 | 1.76 |
| Shigatse | Tibet   | NEC | 0.40 | 0.02 | 0.27 | 0.55 | 0.34 | 0.01 | 0.29 | 0.41 | 0.38 | 0.01 | 0.23 | 0.51 |
| Lhoka    | Tibet   | NEC | 0.48 | 0.02 | 0.31 | 0.66 | 0.64 | 0.02 | 0.49 | 0.76 | 0.40 | 0.03 | 0.27 | 0.86 |

174 <sup>a</sup> EC and NEC denote emission control and non-emission control regions, respectively, of which the latter means regions without implementation  
175 of emission control measures.

176 <sup>b</sup> The pre-Parade Blue, Parade Blue, and post-Parade Blue periods indicate the periods of 1-19 August, 20 August-3 September, and 4-30  
177 September 2015, respectively.

178
